# Supplementary material for: The 3D genome of plasma cells in multiple myeloma
Source: Research Square preprint supplement (doi:10.21203/rs.3.rs-5663072/v1), 2025-04-10
Supplement: Supplementary file 1 [file 1b1ad19d050723cedf5a3cff.xlsx]

## Sheet: Table S1 
Table S1. The basic information of five patients
	Sample
Basic information	Mmc1	Mmc2	Mmc4	Mmc5	Mmc6	Control
Age	67	57	80	58	61	44
sex	male	famale	male	male	famale	male
Treatment	bortezomib+thalidomide+dexamethaone	pomalidomide+dexamethaone	bortezomib+dexamethaone	bortezomib+lenalidomide+dexamethaone	pomalidomide+bortezomib+dexamethaone+daletumab+seliniso	Normal
Time of diagnosis	2018.8	2020.8	2022.4	2022.4	2023.7	Normal
FISH	17p-	NA	1q21 amplification, del(13/13q)	1q21 amplification, del(13/13q)	1q21 amplification, del(13/13q), t(4:14)	Normal
Karyotype	Normal	Normal	76-77（3n），X,-X,-Y,-1，+2，-4，+5，del(6)(q21),+del(6)(q21)*2,+7,+9,-10,+11,-13,+15,+15,der(16)t(1;16)(q21,q22),+der(16)t(1;16)(q21,q22),+19,+19,+20,+21,+21,-22(cp17)/46,XY(3)	43,X,-Y,-1,der(5)t(1;5)(q21;q35),der(6)t(1;6)(q21;q27),-13,der(18)t(1;18)(q21;q23)[8]/	43,X,-X,add(1)(p11),+del(1)(p22p13),add(4)(p16),del(6)(q13),-8,del(12)(p11.2),-13,del( 16)(q22),-22[12]/43,idem,del(2)(p11.2)[3]/43,X,-X,del(1)(p22p13),dic(1;1)(p36.1;p13), del(2)(p11.2),add(4)(p16),del(6)(q13),del(12)(p11.2),-13,del(16)(q22),-22[4]/46,XX[1]	Normal

## Sheet: Table S2 
Table S2 Sample statistics for Hi-C sequencing
Sample name	Library ID	Reads number	Base number (bp)	Clean data (Gb)	GC(%)	Q20(%)	Q30(%)	Total read	Mapped read	Mapped read (%)	Unique Mapped_Read	Unique Mapped Read(%)	Unique Paired Alignments	Unique Paired Alignments(%)	Valid Interaction Pairs	Valid Interaction Pairs(%)	Dangling End Pairs	Dangling End Pairs(%)	Re-ligation Pairs	Re-ligation Pairs(%)	Self-cycle Pairs	Self-cycle Pairs(%)	Dumped Pairs	Dumped Pairs(%)	PCR Duplicate	PCR Duplicate(%)	Cis	Cis-close	Cis-far	Trans	Cis/Trans	Cis ratio (%)	Cis-close ratio (%)	Cis-far ratio (%)	TAD_number	TAD_mean_length	sub_TAD_number	sub_TAD_mean_length	Resolution (bp)	Loop_number	Loop_mean_length
control	control	572626674	170467764908	170.468	42.8	97.94	94.36	1231772756	1055622075	85.7	681574504	55.33	340787252	100	257096510	75.44	15558628	4.57	3642052	1.07	215039	0.06	77560	0.02	60452345	17.74	161610799	21576472	140034327	95485711	1.69	62.86	13.3509	86.6491	3197	715996	1348	508486	9500	5147	601210
MMC1	MMC1	607914031	181045413758	181.045	42.68	97.34	93.04	1362475028	1176478779	86.35	770787102	56.57	385393551	100	275304084	71.43	28221690	7.32	5831777	1.51	482658	0.13	52959	0.01	70979728	18.42	154421281	25387072	129034209	120882803	1.28	56.0912	16.4401	83.5599	3988	657332	1700	510799	8150	6929	566612
MMC2	MMC2	672470442	199709482496	199.709	43.44	96.61	91.57	1146600796	983422776	85.77	632053170	55.12	316026585	100	188569693	59.67	22580788	7.15	2769500	0.88	104185	0.03	279336	0.09	97149179	30.74	114335293	12313356	102021937	74234400	1.54	60.6329	10.7695	89.2305	3470	705337	1522	525518	13100	6240	543823
MMC4	MMC4	564069766	167780116990	167.78	42.06	97.88	94.26	1384075460	1218256360	88.02	812113962	58.68	406056981	100	250331263	61.65	26678814	6.57	1998143	0.49	169228	0.04	40384	0.01	113718196	28.01	131150098	12437755	118712343	119181165	1.1	52.3906	9.4836	90.5164	3701	697433	1562	525658	8650	4113	422697
MMC5	MMC5	678912953	202725190398	202.725	42.19	98.14	94.68	1097676736	959811614	87.44	631505234	57.53	315752617	100	237519178	75.22	26210730	8.3	1605510	0.51	247400	0.08	38907	0.01	39640184	12.55	105830469	9602167	96228302	131688709	0.8	44.5566	9.07316	90.9268	3201	742943	1277	564510	10800	1872	536967
MMC6	MMC6	538608344	160466701250	160.467	43.03	97.04	92.41	1155577922	988727790	85.56	644936458	55.81	322468229	100	244829314	75.92	16713598	5.18	2618465	0.81	177115	0.05	55394	0.02	54591111	16.93	162940795	24783664	138157131	81888519	1.99	66.5528	15.2102	84.7898	3774	695686	1559	556099	8650	1069	602480

## Sheet: Table S3  
Table S3 Sample statistics for genome resequencing
Sample name	Clean reads	Clean base (bp)	Clean data (Gb)	Q20(%)	Q30(%)	GC(%)	Mapped(%)	Properly_mapped(%)	Ave_depth	Cov_ratio_1X(%)	Cov_ratio_5X(%)	Cov_ratio_10X(%)	SNP number	Transition	Transversion	Ti/Tv	Heterozygosity	Homozygosity	Het-ratio
MMC1	632946220	94165304982	94.1653	97.63	93.51	40.02	99.71	91.49	30	99.56	98.69	95.73	3349150	2261954	1087196	2.08	1784934	1564216	0.5329
MMC2	634757446	94820131864	94.8201	97.85	94.31	39.95	99.52	82.01	30	99.03	97.8	92.62	3671896	2451978	1219918	2	2155175	1516721	0.5869
MMC4	917201878	136839235092	136.839	99.64	97.22	41.18	99.9	84.65	44	99.75	99.06	97.34	3370180	2275980	1094200	2.08	1786513	1583667	0.53
MMC5	1206570988	180333611178	180.334	99.76	98.65	40.26	99.9	91.72	58	99.71	98.79	97.99	3418343	2308734	1109609	2.08	1877632	1540711	0.5492
MMC6	694380194	103805370438	103.805	99.75	98.64	40.24	99.9	93.43	33	98.97	97.99	95.79	3346289	2263504	1082785	2.09	1748066	1598223	0.5223
control	631296342	94066524666	94.0665	98.18	94.68	40.51	99.63	92.66	30	99.65	98.83	96.55	3446561	2328960	1117601	2.08	1948232	1498329	0.5652
Total													6578337	4402156	2176181	2.02	-	-	-

## Sheet: Table S4  
Table S4 SNP annotated statistics.
Region	Type	All	MMC1	MMC2	MMC4	MMC5	MMC6	control
--	INTERGENIC	3636606	1873386	2036608	1882119	1915841	1874162	1928491
--	INTRAGENIC	34492	17948	18862	17595	17618	17274	18029
--	INTRON	2527412	1267168	1408602	1276939	1288718	1264129	1301125
--	UPSTREAM	136799	69840	75797	71495	72397	70096	71820
--	DOWNSTREAM	136074	68030	75595	68950	70011	68044	71001
--	UTR_5_PRIME	8213	4273	4278	4286	4364	4248	4291
--	UTR_3_PRIME	48921	24676	26662	24723	24918	24372	25922
--	SPLICE_SITE_ACCEPTOR	158	65	99	67	65	72	67
--	SPLICE_SITE_DONOR	215	94	115	104	96	94	93
--	SPLICE_SITE_REGION	3413	1731	1892	1756	1755	1753	1796
--	START_GAINED	596	312	295	292	280	281	291
CDS	START_LOST	67	33	35	28	36	34	32
CDS	SYNONYMOUS_START	0	0	0	0	0	0	0
CDS	NON_SYNONYMOUS_START	0	0	0	0	0	0	0
CDS	SYNONYMOUS_CODING	22371	10840	11233	11023	11170	10952	12453
CDS	NON_SYNONYMOUS_CODING	22547	10595	11574	10647	10893	10612	10981
CDS	SYNONYMOUS_STOP	30	14	14	11	15	16	17
CDS	STOP_GAINED	348	107	194	108	125	113	113
CDS	STOP_LOST	75	38	41	37	41	37	39
--	Other	0	0	0	0	0	0	0

## Sheet: Table S5
Table S5 Small InDel annotated statistics.
Region	Type	All	MMC1	MMC2	MMC4	MMC5	MMC6	Control
--	INTERGENIC	614911	286572	334549	289517	307234	281311	273004
--	INTRAGENIC	6442	3119	3499	3147	3274	2956	2774
--	INTRON	505353	229032	269608	238994	253636	228051	212356
--	UPSTREAM	29752	14025	15759	14607	15607	13704	12681
--	DOWNSTREAM	29793	13701	15853	14450	15212	13484	12756
--	UTR_5_PRIME	1249	618	627	626	629	619	575
--	UTR_3_PRIME	11024	5055	5827	5349	5631	5161	5080
--	SPLICE_SITE_ACCEPTOR	73	14	30	18	16	14	27
--	SPLICE_SITE_DONOR	91	33	37	31	31	27	52
--	SPLICE_SITE_REGION	771	360	395	424	418	372	340
CDS	START_LOST	8	4	3	4	4	2	2
CDS	FRAME_SHIFT	1248	336	694	254	278	254	384
CDS	CODON_DELETION	290	123	112	105	117	104	119
CDS	EXON_DELETED	0	0	0	0	0	0	0
CDS	CODON_INSERTION	272	118	142	129	134	117	136
CDS	CODON_CHANGE_PLUS_CODON_DELETION	194	75	94	74	72	82	75
CDS	CODON_CHANGE_PLUS_CODON_INSERTION	87	22	53	26	24	24	25
CDS	STOP_GAINED	46	5	39	4	3	3	4
CDS	STOP_LOST	9	2	3	3	3	2	5
--	Other	0	0	0	0	0	0	0

## Sheet: Table S6
Table S6. Number of structural variations (SV) and CNVs in each sample.
Sample	SV total	INS	DEL	INV	DUP	TRA	CNV
MMC1	5540	596	2555	107	688	1594	5895
MMC2	69169	799	2187	65308	441	434	6253
MMC4	6528	898	3446	137	1631	416	5555
MMC5	9559	1424	4414	229	2766	726	2704
MMC6	7736	1082	3740	186	2222	506	4031
Control	5984	770	3150	125	1285	654	1067
Note: INS: insertion; DEL: deletion; INV: inversion; DUP: repeat; TRA:chromosomal translocation; CNV: copy number variation.

## Sheet: Table S7
Table S7. Number of genes with different kinds of variations.
Sample	Genes with Non-synonymous SNP	Genes with InDel	Genes with SV	Total
MMC1	6752	927	1211	7765
MMC2	7334	1314	8572	12497
MMC4	6779	890	1625	7957
MMC5	6872	931	2225	8366
MMC6	6768	845	1814	8034
control	6922	952	1551	8087

## Sheet: Table S8
Table S8 Sample statistics for bulk RNA sequencing
Sample name	Clean reads	Clean bases (bp)	Clean data (Gb)	GC Content	%≥Q30	Mapped Reads	Uniq Mapped Reads	Multiple Map Reads	Reads Map to '+'	Reads Map to '-'
MMC1	23018100	6841540786	6.84154	0.5335	0.9554	40,084,239 (95.41%)	38,803,217 (92.36%)	1,281,022 (3.05%)	21,037,487 (50.08%)	21,054,035 (50.12%)
MMC2	21203846	6343479832	6.34348	0.5351	0.9498	41,225,041 (89.55%)	38,124,403 (82.81%)	3,100,638 (6.74%)	22,526,195 (48.93%)	23,587,321 (51.24%)
MMC4	26892990	8051073040	8.05107	0.5312	0.9419	34,698,964 (81.82%)	29,396,846 (69.32%)	5,302,118 (12.50%)	23,267,801 (54.87%)	20,947,655 (49.40%)
MMC6	21759612	6508598720	6.5086	0.5276	0.9375	46,178,472 (85.86%)	40,867,102 (75.98%)	5,311,370 (9.88%)	27,445,885 (51.03%)	27,674,917 (51.45%)
control	21005391	6265899276	6.2659	0.5014	0.9424	38,362,808 (88.15%)	35,675,342 (81.98%)	2,687,466 (6.18%)	21,542,159 (49.50%)	20,901,166 (48.03%)

## Sheet: Table S9
Table S9. CNVs related to genes detected in all MM samples
Chr	Start	End	Type_of_alteration	GeneID	COG_class	COG_class_annotation	GO_annotation	KEGG_annotation	KEGG_pathway_annotation	KEGG_pathway_annotation	KOG_class	KOG_class_annotation	Pfam_annotation	Swissprot_annotation	eggNOG_class	eggNOG_class_annotation	nr_annotation
1	144150000	146150000	gain	ENSG00000271567	[O]	Posttranslational modification, protein turnover, chaperones	--	K12738|1.03908e-126|ptr:100612002|K12738 peptidylprolyl cis-trans isomerase A-like 4 [EC:5.2.1.8] | (RefSeq) peptidyl-prolyl cis-trans isomerase A-like 4A	--		[O]	Posttranslational modification, protein turnover, chaperones	Cyclophilin type peptidyl-prolyl cis-trans isomerase/CLD	Peptidyl-prolyl cis-trans isomerase A-like 4F OS=Homo sapiens OX=9606 GN=PPIAL4F PE=3 SV=1	O	Posttranslational modification, protein turnover, chaperones	peptidyl-prolyl cis-trans isomerase A-like 4E [Homo sapiens]
1	0	150000	gain	ENSG00000186092	--	--	Molecular Function: G-protein coupled receptor activity (GO:0004930);; Molecular Function: olfactory receptor activity (GO:0004984);; Cellular Component: plasma membrane (GO:0005886);; Biological Process: G-protein coupled receptor signaling pathway (GO:0007186);; Cellular Component: integral component of membrane (GO:0016021);; Biological Process: detection of chemical stimulus involved in senso…	K04257|0|hsa:79501|K04257 olfactory receptor | (RefSeq) OR4F5; olfactory receptor family 4 subfamily F member 5	Olfactory transduction (ko04740)	ko04740:Olfactory transduction	--	--	Olfactory receptor;; 7 transmembrane receptor (rhodopsin family);; Serpentine type 7TM GPCR chemoreceptor Srsx	Olfactory receptor 4F5 OS=Homo sapiens OX=9606 GN=OR4F5 PE=3 SV=1	U	Intracellular trafficking, secretion, and vesicular transport	olfactory receptor 4F5 [Homo sapiens]
1	143300000	144100000	gain	ENSG00000203818	--	--	Biological Process: negative regulation of transcription from RNA polymerase II promoter (GO:0000122);; Biological Process: chromatin silencing at rDNA (GO:0000183);; Cellular Component: nuclear chromosome, telomeric region (GO:0000784);; Cellular Component: nuclear nucleosome (GO:0000788);; Biological Process: positive regulation of defense response to virus by host (GO:0002230);; Cellular Compo…	K11253|3.9597e-90|xtr:549390|K11253 histone H3 | (RefSeq) hist2h3c, h3.2, h3/m, h3f2, h3fm, hist1h3g; histone cluster 2, H3c	Systemic lupus erythematosus (ko05322);; Transcriptional misregulation in cancer (ko05202);; Alcoholism (ko05034)	ko05202:Transcriptional misregulation in cancer;ko05322:Systemic lupus erythematosus;ko05034:Alcoholism	[B]	Chromatin structure and dynamics	Core histone H2A/H2B/H3/H4	Histone H3.2 OS=Homo sapiens OX=9606 GN=HIST2H3A PE=1 SV=3	B	Chromatin structure and dynamics	histone cluster 2 H3 pseudogene 2 [Homo sapiens]
1	16550000	16650000	gain	ENSG00000219481	--	--	Molecular Function: calcium ion binding (GO:0005509);; Cellular Component: cytoplasm (GO:0005737);; Cellular Component: integral component of membrane (GO:0016021);; Molecular Function: RNA binding (GO:0044822);;	--	--	--	--	--	Repeat of unknown function (DUF1220)	Neuroblastoma breakpoint family member 1 OS=Homo sapiens OX=9606 GN=NBPF1 PE=2 SV=2	S	Function unknown	neuroblastoma breakpoint family member 1 [Homo sapiens]
1	143300000	144100000	gain	ENSG00000263513	--	--	Molecular Function: protein binding (GO:0005515);; Cellular Component: mitochondrion (GO:0005739);;	--	--	--	--	--	FAM72 protein	Protein FAM72C OS=Homo sapiens OX=9606 GN=FAM72C PE=3 SV=2	S	Function unknown	protein FAM72C isoform 1 [Homo sapiens]
1	144150000	146150000	gain	ENSG00000266338	--	--	Cellular Component: cytoplasm (GO:0005737);; Cellular Component: integral component of membrane (GO:0016021);; Molecular Function: RNA binding (GO:0044822);;	--	--	--	--	--	Repeat of unknown function (DUF1220)	Neuroblastoma breakpoint family member 15 OS=Homo sapiens OX=9606 GN=NBPF15 PE=2 SV=2	S	Function unknown	neuroblastoma breakpoint family member 15 [Homo sapiens]
1	144150000	146150000	gain	ENSG00000279782	[O]	Posttranslational modification, protein turnover, chaperones	Biological Process: protein peptidyl-prolyl isomerization (GO:0000413);; Cellular Component: P-body (GO:0000932);; Molecular Function: IgM binding (GO:0001791);; Biological Process: pattern recognition receptor signaling pathway (GO:0002221);; Biological Process: immunoglobulin transcytosis in epithelial cells (GO:0002414);; Molecular Function: peptidyl-prolyl cis-trans isomerase activity (GO:000…	K12738|2.11611e-127|ptr:100612002|K12738 peptidylprolyl cis-trans isomerase A-like 4 [EC:5.2.1.8] | (RefSeq) peptidyl-prolyl cis-trans isomerase A-like 4A	--		[O]	Posttranslational modification, protein turnover, chaperones	Cyclophilin type peptidyl-prolyl cis-trans isomerase/CLD	Peptidyl-prolyl cis-trans isomerase A-like 4F OS=Homo sapiens OX=9606 GN=PPIAL4F PE=3 SV=1	O	Posttranslational modification, protein turnover, chaperones	peptidyl-prolyl cis-trans isomerase A-like 4E [Homo sapiens]
1	144150000	146150000	gain	ENSG00000196369	--	--	--	--	--	--	[Z]	Cytoskeleton	Fes/CIP4, and EFC/F-BAR homology domain	SLIT-ROBO Rho GTPase-activating protein 2B OS=Homo sapiens OX=9606 GN=SRGAP2B PE=3 SV=1	Z	Cytoskeleton	SLIT-ROBO Rho GTPase-activating protein 2B isoform 1 [Homo sapiens]
3	75650000	75700000	gain	ENSG00000172969	--	--	Cellular Component: nucleus (GO:0005634);;	--	--	--	--	--	Facioscapulohumeral muscular dystrophy candidate 2	Protein FRG2-like-2 OS=Homo sapiens OX=9606 GN=FRG2C PE=3 SV=1	S	Function unknown	protein FRG2-like-2 [Homo sapiens]
3	75750000	75800000	gain	ENSG00000227124	[R]	General function prediction only	Molecular Function: DNA binding (GO:0003677);; Molecular Function: transcription factor activity, sequence-specific DNA binding (GO:0003700);; Cellular Component: nucleus (GO:0005634);; Biological Process: regulation of transcription, DNA-templated (GO:0006355);; Molecular Function: metal ion binding (GO:0046872);;	K09228|0|hsa:100131827|K09228 KRAB domain-containing zinc finger protein | (RefSeq) ZNF717, X17, ZNF838; zinc finger protein 717	--		[R]	General function prediction only	Zinc-finger double domain;; Zinc finger, C2H2 type;; C2H2-type zinc finger;; C2H2-type zinc finger;; XPA protein N-terminal;; Zinc-finger double-stranded RNA-binding;; Zinc-finger double domain;; Zinc finger, C2H2 type;; C2H2-type zinc finger;; C2H2-type zinc finger	Zinc finger protein 717 OS=Homo sapiens OX=9606 GN=ZNF717 PE=2 SV=2	S	Function unknown	PREDICTED: zinc finger protein 717 isoform X1 [Homo sapiens]
4	190000000	190214555	gain	ENSG00000205097	--	--	Cellular Component: nucleus (GO:0005634);;	--	--	--	--	--	Facioscapulohumeral muscular dystrophy candidate 2	Protein FRG2 OS=Homo sapiens OX=9606 GN=FRG2 PE=2 SV=1	S	Function unknown	protein FRG2 isoform 1 [Homo sapiens]
4	190000000	190214555	gain	ENSG00000260596	--	--	Molecular Function: transcription regulatory region sequence-specific DNA binding (GO:0000976);; Molecular Function: protein binding (GO:0005515);; Cellular Component: nucleoplasm (GO:0005654);; Biological Process: apoptotic process (GO:0006915);; Biological Process: negative regulation of cell proliferation (GO:0008285);; Cellular Component: nuclear membrane (GO:0031965);; Biological Process: po…	--	--	--	[K]	Transcription	Homeobox domain;; Homeobox KN domain	Double homeobox protein 4 OS=Homo sapiens OX=9606 GN=DUX4 PE=1 SV=2	K	Transcription	double homeobox protein 4 [Homo sapiens]
8	43200000	43250000	gain	ENSG00000165102	[R]	General function prediction only	--	K10532|0|hsa:138050|K10532 heparan-alpha-glucosaminide N-acetyltransferase [EC:2.3.1.78] | (RefSeq) HGSNAT, HGNAT, MPS3C, RP73, TMEM76; heparan-alpha-glucosaminide N-acetyltransferase	Glycosaminoglycan degradation (ko00531);; Lysosome (ko04142)	ko04142:Lysosome;ko00531:Glycosaminoglycan degradation	[S]	Function unknown	Protein of unknown function (DUF1624);; Domain of unknown function (DUF5009)	Heparan-alpha-glucosaminide N-acetyltransferase OS=Homo sapiens OX=9606 GN=HGSNAT PE=1 SV=2	S	Function unknown	RecName: Full=Heparan-alpha-glucosaminide N-acetyltransferase; AltName: Full=Transmembrane protein 76
14	18600000	19950000	gain	ENSG00000187537	[T]	Signal transduction mechanisms	Biological Process: retina homeostasis (GO:0001895);; Molecular Function: ATP binding (GO:0005524);; Cellular Component: plasma membrane (GO:0005886);; Cellular Component: integral component of membrane (GO:0016021);; Biological Process: substantia nigra development (GO:0021762);; Cellular Component: extracellular exosome (GO:0070062);; Cellular Component: blood microparticle (GO:0072562);;	K17299|0|hsa:404785|K17299 POTE ankyrin domain family protein | (RefSeq) POTEG, A26C2, ACTBL1, CT104.4, POTE-14, POTE14, POTE14alpha, POTE22; POTE ankyrin domain family member G	--		[Z]	Cytoskeleton	Ankyrin repeats (3 copies);; Ankyrin repeat;; Ankyrin repeats (many copies);; Ankyrin repeats (many copies);; Ankyrin repeat;; Actin;; CCDC144C protein coiled-coil region	POTE ankyrin domain family member G OS=Homo sapiens OX=9606 GN=POTEG PE=2 SV=5	S	Function unknown	POTE ankyrin domain family member G [Homo sapiens]
14	18600000	19950000	gain	ENSG00000222036	[D]	Cell cycle control, cell division, chromosome partitioning	Biological Process: retina homeostasis (GO:0001895);; Molecular Function: ATP binding (GO:0005524);; Cellular Component: integral component of membrane (GO:0016021);; Biological Process: substantia nigra development (GO:0021762);; Cellular Component: extracellular exosome (GO:0070062);; Cellular Component: blood microparticle (GO:0072562);;	K17299|0|hsa:641455|K17299 POTE ankyrin domain family protein | (RefSeq) POTEM, ACT, P704P, POTE14beta; POTE ankyrin domain family member M	--		[Z]	Cytoskeleton	Ankyrin repeats (many copies);; Ankyrin repeats (3 copies);; Ankyrin repeat;; Ankyrin repeats (many copies);; Ankyrin repeat;; Ankyrin repeats (3 copies);; Ankyrin repeat;; Ankyrin repeats (many copies);; Ankyrin repeats (many copies);; Ankyrin repeat;; CCDC144C protein coiled-coil region	Putative POTE ankyrin domain family member M OS=Homo sapiens OX=9606 GN=POTEM PE=3 SV=2	S	Function unknown	POTE14B [Homo sapiens]
15	20450000	21500000	gain	ENSG00000277322	--	--	--	--	--	--	[S]	Function unknown	--	Golgin subfamily A member 6-like protein 6 OS=Homo sapiens OX=9606 GN=GOLGA6L6 PE=3 SV=4	S	Function unknown	LOC283767 protein, partial [Homo sapiens]
17	21650000	21850000	gain	ENSG00000260458	[G]	Carbohydrate transport and metabolism	Cellular Component: integral component of plasma membrane (GO:0005887);; Biological Process: muscle contraction (GO:0006936);; Biological Process: potassium ion import (GO:0010107);; Molecular Function: G-protein activated inward rectifier potassium channel activity (GO:0015467);; Molecular Function: PDZ domain binding (GO:0030165);; Cellular Component: T-tubule (GO:0030315);; Cellular Component:…	K05005|0|ptr:746628|K05005 potassium inwardly-rectifying channel subfamily J member 12 | (RefSeq) ATP-sensitive inward rectifier potassium channel 12	Oxytocin signaling pathway (ko04921);; Cholinergic synapse (ko04725)	ko04921:Oxytocin signaling pathway;ko04725:Cholinergic synapse	[P]	Inorganic ion transport and metabolism	Inward rectifier potassium channel;; Inward rectifier potassium channel N-terminal	Inward rectifier potassium channel 18 OS=Homo sapiens OX=9606 GN=KCNJ18 PE=1 SV=3	U	Intracellular trafficking, secretion, and vesicular transport	PREDICTED: inward rectifier potassium channel 18 isoform X1 [Homo sapiens]
21	10500000	10650000	gain	ENSG00000274391	--	--	--	K18079|0|hsa:7179|K18079 PTEN homologous phosphatase | (RefSeq) TPTE, CT44, PTEN2; transmembrane phosphatase with tensin homology	--		[TR]	--	C2 domain of PTEN tumour-suppressor protein;; Dual specificity phosphatase, catalytic domain	Putative tyrosine-protein phosphatase TPTE OS=Homo sapiens OX=9606 GN=TPTE PE=2 SV=3	T	Signal transduction mechanisms	putative tyrosine-protein phosphatase TPTE isoform beta [Homo sapiens]
4	68500000	68600000	loss	ENSG00000197888	[G]	Carbohydrate transport and metabolism	Molecular Function: retinoic acid binding (GO:0001972);; Cellular Component: endoplasmic reticulum membrane (GO:0005789);; Biological Process: xenobiotic metabolic process (GO:0006805);; Biological Process: steroid metabolic process (GO:0008202);; Biological Process: flavonoid biosynthetic process (GO:0009813);; Molecular Function: glucuronosyltransferase activity (GO:0015020);; Cellular Componen…	K00699|0|hsa:7367|K00699 glucuronosyltransferase [EC:2.4.1.17] | (RefSeq) UGT2B17, BMND12, UDPGT2B17; UDP glucuronosyltransferase family 2 member B17	Pentose and glucuronate interconversions (ko00040);; Drug metabolism - other enzymes (ko00983);; Bile secretion (ko04976);; Ascorbate and aldarate metabolism (ko00053);; Chemical carcinogenesis (ko05204);; Retinol metabolism (ko00830);; Porphyrin and chlorophyll metabolism (ko00860);; Starch and sucrose metabolism (ko00500);; Steroid hormone biosynthesis (ko00140);; Drug metabolism - cytochrome P…	ko00040:Pentose and glucuronate interconversions;ko00053:Ascorbate and aldarate metabolism;ko00500:Starch and sucrose metabolism;ko00860:Porphyrin and chlorophyll metabolism;ko00980:Metabolism of xenobiotics by cytochrome P450;ko00830:Retinol metabolism;ko05204:Chemical carcinogenesis;ko04976:Bile secretion;ko00140:Steroid hormone biosynthesis;ko00982:Drug metabolism - cytochrome P450;ko00983:Dru…	[GC]	--	UDP-glucoronosyl and UDP-glucosyl transferase;; Glycosyltransferase family 28 C-terminal domain	UDP-glucuronosyltransferase 2B17 OS=Homo sapiens OX=9606 GN=UGT2B17 PE=1 SV=1	S	Function unknown	UDP-glucuronosyltransferase 2B17 precursor [Homo sapiens]
8	8200000	12400000	loss	ENSG00000233050	--	--	Cellular Component: extracellular region (GO:0005576);; Biological Process: defense response to bacterium (GO:0042742);;	--	--	--	--	--	Beta defensin	Beta-defensin 130B OS=Homo sapiens OX=9606 GN=DEFB130B PE=2 SV=1	S	Function unknown	beta-defensin 130A precursor [Homo sapiens]
8	7950000	8000000	loss	ENSG00000225327	--	--	Molecular Function: thiol-dependent ubiquitin-specific protease activity (GO:0004843);; Molecular Function: protein binding (GO:0005515);; Cellular Component: nucleolus (GO:0005730);; Cellular Component: endoplasmic reticulum membrane (GO:0005789);; Biological Process: ubiquitin-dependent protein catabolic process (GO:0006511);; Biological Process: mitotic cell cycle checkpoint (GO:0007093);; Bio…	--	--	--	[O]	Posttranslational modification, protein turnover, chaperones	Ubiquitin carboxyl-terminal hydrolase;; Ubiquitin carboxyl-terminal hydrolase	Ubiquitin carboxyl-terminal hydrolase 17-like protein 3 OS=Homo sapiens OX=9606 GN=USP17L3 PE=3 SV=1	O	Posttranslational modification, protein turnover, chaperones	ubiquitin carboxyl-terminal hydrolase 17-like protein 3 [Homo sapiens]
8	7950000	8000000	loss	ENSG00000237038	--	--	Molecular Function: thiol-dependent ubiquitin-specific protease activity (GO:0004843);; Molecular Function: protein binding (GO:0005515);; Cellular Component: nucleolus (GO:0005730);; Cellular Component: endoplasmic reticulum membrane (GO:0005789);; Biological Process: ubiquitin-dependent protein catabolic process (GO:0006511);; Biological Process: mitotic cell cycle checkpoint (GO:0007093);; Bio…	--	--	--	[O]	Posttranslational modification, protein turnover, chaperones	Ubiquitin carboxyl-terminal hydrolase;; Ubiquitin carboxyl-terminal hydrolase	Inactive ubiquitin carboxyl-terminal hydrolase 17-like protein 8 OS=Homo sapiens OX=9606 GN=USP17L8 PE=3 SV=1	O	Posttranslational modification, protein turnover, chaperones	inactive ubiquitin carboxyl-terminal hydrolase 17-like protein 8 [Homo sapiens]
8	7950000	8000000	loss	ENSG00000215356	--	--	Molecular Function: DNA binding (GO:0003677);; Cellular Component: nucleus (GO:0005634);; Biological Process: regulation of transcription, DNA-templated (GO:0006355);; Molecular Function: metal ion binding (GO:0046872);;	--	--	--	[R]	General function prediction only	Zinc-finger double domain;; KRAB box;; Zinc finger, C2H2 type;; C2H2-type zinc finger	Putative zinc finger protein 705B OS=Homo sapiens OX=9606 GN=ZNF705B PE=5 SV=1	S	Function unknown	zinc finger protein 705B [Homo sapiens]
8	8200000	12400000	loss	ENSG00000232948	--	--	Cellular Component: extracellular region (GO:0005576);; Biological Process: defense response to bacterium (GO:0042742);;	--	--	--	--	--	Beta defensin	Beta-defensin 130B OS=Homo sapiens OX=9606 GN=DEFB130B PE=2 SV=1	S	Function unknown	beta-defensin 130A precursor [Homo sapiens]
13	18450000	63050000	loss	ENSG00000204977	--	--	Molecular Function: ubiquitin-protein transferase activity (GO:0004842);; Molecular Function: signal transducer activity (GO:0004871);; Molecular Function: protein binding (GO:0005515);; Cellular Component: endoplasmic reticulum membrane (GO:0005789);; Molecular Function: zinc ion binding (GO:0008270);; Biological Process: anatomical structure morphogenesis (GO:0009653);; Biological Process: resp…	K12003|0|hsa:10206|K12003 tripartite motif-containing protein 13 [EC:2.3.2.27] | (RefSeq) TRIM13, CAR, DLEU5, LEU5, RFP2, RNF77; tripartite motif containing 13	--		[O]	Posttranslational modification, protein turnover, chaperones	RING-type zinc-finger;; Zinc finger, C3HC4 type (RING finger);; B-box zinc finger;; Zinc finger, C3HC4 type (RING finger);; Ring finger domain;; BTB/POZ domain	E3 ubiquitin-protein ligase TRIM13 OS=Homo sapiens OX=9606 GN=TRIM13 PE=1 SV=2	O	Posttranslational modification, protein turnover, chaperones	E3 ubiquitin-protein ligase TRIM13 isoform 2 [Homo sapiens]
13	63100000	114364328	loss	ENSG00000175820	--	--	--	--	--	--	--	--	Coiled-coil domain-containing protein 168	Coiled-coil domain-containing protein 168 OS=Homo sapiens OX=9606 GN=CCDC168 PE=2 SV=2	S	Function unknown	coiled-coil domain-containing protein 168 [Homo sapiens]
13	18450000	63050000	loss	ENSG00000165416	[T]	Signal transduction mechanisms	--	K12795|0|pon:100455328|K12795 suppressor of G2 allele of SKP1 | (RefSeq) SUGT1; SGT1 homolog, MIS12 kinetochore complex assembly cochaperone	NOD-like receptor signaling pathway (ko04621)	ko04621:NOD-like receptor signaling pathway	[T]	Signal transduction mechanisms	SGS domain;; CS domain;; Tetratricopeptide repeat;; Tetratricopeptide repeat;; Tetratricopeptide repeat;; Tetratricopeptide repeat	Protein SGT1 homolog OS=Homo sapiens OX=9606 GN=SUGT1 PE=1 SV=3	S	Function unknown	protein SGT1 homolog isoform A [Homo sapiens]
13	18450000	63050000	loss	ENSG00000150907	--	--	--	K07201|0|ptr:467352|K07201 forkhead box protein O1 | (RefSeq) FOXO1, FOXO1A; forkhead box O1	Pathways in cancer (ko05200);; Longevity regulating pathway - multiple species (ko04213);; Insulin resistance (ko04931);; AMPK signaling pathway (ko04152);; Insulin signaling pathway (ko04910);; Thyroid hormone signaling pathway (ko04919);; AGE-RAGE signaling pathway in diabetic complications (ko04933);; Longevity regulating pathway (ko04211);; Prostate cancer (ko05215);; Glucagon signaling pathw…	ko04211:Longevity regulating pathway;ko05215:Prostate cancer;ko04152:AMPK signaling pathway;ko05202:Transcriptional misregulation in cancer;ko04068:FoxO signaling pathway;ko04933:AGE-RAGE signaling pathway in diabetic complications;ko04919:Thyroid hormone signaling pathway;ko04213:Longevity regulating pathway - multiple species;ko04922:Glucagon signaling pathway;ko04910:Insulin signaling pathway;…	[K]	Transcription	KIX-binding domain of forkhead box O, CR2;; Forkhead domain;; Transactivation domain of FOXO protein family	Forkhead box protein O1 OS=Homo sapiens OX=9606 GN=FOXO1 PE=1 SV=2	K	Transcription	forkhead box protein O1 [Homo sapiens]
13	18450000	63050000	loss	ENSG00000120675	[K]	Transcription	Molecular Function: protein binding (GO:0005515);; Cellular Component: mitochondrial inner membrane (GO:0005743);; Biological Process: cellular response to starvation (GO:0009267);; Biological Process: protein transport (GO:0015031);; Cellular Component: integral component of membrane (GO:0016021);; Biological Process: regulation of lipid metabolic process (GO:0019216);; Biological Process: negat…	K09535|1.34066e-82|hsa:29103|K09535 DnaJ homolog subfamily C member 15 | (RefSeq) DNAJC15, DNAJD1, HSD18, MCJ; DnaJ heat shock protein family (Hsp40) member C15	--		[O]	Posttranslational modification, protein turnover, chaperones	--	DnaJ homolog subfamily C member 15 OS=Homo sapiens OX=9606 GN=DNAJC15 PE=1 SV=2	O	Posttranslational modification, protein turnover, chaperones	dnaJ homolog subfamily C member 15 [Homo sapiens]
13	18450000	63050000	loss	ENSG00000122033	--	--	--	K02520|0|hsa:219402|K02520 translation initiation factor IF-3 | (RefSeq) MTIF3, IF3mt; mitochondrial translational initiation factor 3	--		--	--	Translation initiation factor IF-3, C-terminal domain;; Translation initiation factor IF-3, N-terminal domain	Translation initiation factor IF-3, mitochondrial OS=Homo sapiens OX=9606 GN=MTIF3 PE=1 SV=4	J	Translation, ribosomal structure and biogenesis	translation initiation factor IF-3, mitochondrial [Homo sapiens]
13	18450000	63050000	loss	ENSG00000180332	--	--	Biological Process: protein homooligomerization (GO:0051260);;	--	--	--	[R]	General function prediction only	BTB/POZ domain	BTB/POZ domain-containing protein KCTD4 OS=Homo sapiens OX=9606 GN=KCTD4 PE=1 SV=2	S	Function unknown	BTB/POZ domain-containing protein KCTD4 [Homo sapiens]
13	63100000	114364328	loss	ENSG00000174405	[L]	Replication, recombination and repair	Biological Process: single strand break repair (GO:0000012);; Cellular Component: nuclear chromosome, telomeric region (GO:0000784);; Cellular Component: condensed chromosome (GO:0000793);; Biological Process: in utero embryonic development (GO:0001701);; Biological Process: pro-B cell differentiation (GO:0002328);; Molecular Function: DNA binding (GO:0003677);; Molecular Function: DNA ligase (AT…	K10777|0|hsa:3981|K10777 DNA ligase 4 [EC:6.5.1.1] | (RefSeq) LIG4, LIG4S; DNA ligase 4	Non-homologous end-joining (ko03450)	ko03450:Non-homologous end-joining	[L]	Replication, recombination and repair	ATP dependent DNA ligase domain;; DNA ligase N terminus;; BRCA1 C Terminus (BRCT) domain;; DNA ligase IV;; ATP dependent DNA ligase C terminal region;; BRCT domain, a BRCA1 C-terminus domain;; RNA ligase	DNA ligase 4 OS=Homo sapiens OX=9606 GN=LIG4 PE=1 SV=2	L	Replication, recombination and repair	DNA ligase 4 isoform 1 [Homo sapiens]
13	18450000	63050000	loss	ENSG00000136143	[C]	Energy production and conversion	--	K01900|0|hsa:8803|K01900 succinyl-CoA synthetase beta subunit [EC:6.2.1.4 6.2.1.5] | (RefSeq) SUCLA2, A-BETA, A-SCS, MTDPS5, SCS-betaA; succinate-CoA ligase ADP-forming beta subunit	Propanoate metabolism (ko00640);; Carbon metabolism (ko01200);; Citrate cycle (TCA cycle) (ko00020)	ko01200:Carbon metabolism;ko00640:Propanoate metabolism;ko00020:Citrate cycle (TCA cycle)	[C]	Energy production and conversion	ATP-grasp domain;; CoA-ligase;; ATP-grasp domain	Succinate--CoA ligase [ADP-forming] subunit beta, mitochondrial OS=Homo sapiens OX=9606 GN=SUCLA2 PE=1 SV=3	C	Energy production and conversion	hypothetical protein, partial [Homo sapiens]
13	18450000	63050000	loss	ENSG00000136156	--	--	--	K18264|1.27622e-141|rro:104662762|K18264 integral membrane protein 2B | (RefSeq) ITM2B; integral membrane protein 2B	--		[S]	Function unknown	BRICHOS domain	Integral membrane protein 2B OS=Homo sapiens OX=9606 GN=ITM2B PE=1 SV=1	S	Function unknown	E3-16 [Homo sapiens]
13	18450000	63050000	loss	ENSG00000152484	--	--	--	K11842|0|acs:100552678|K11842 ubiquitin carboxyl-terminal hydrolase 12/46 [EC:3.4.19.12] | (RefSeq) usp12; ubiquitin specific peptidase 12	--		[O]	Posttranslational modification, protein turnover, chaperones	Ubiquitin carboxyl-terminal hydrolase;; Ubiquitin carboxyl-terminal hydrolase	Ubiquitin carboxyl-terminal hydrolase 12 OS=Homo sapiens OX=9606 GN=USP12 PE=1 SV=2	O	Posttranslational modification, protein turnover, chaperones	ubiquitin carboxyl-terminal hydrolase 12 [Homo sapiens]
13	63100000	114364328	loss	ENSG00000178695	--	--	Cellular Component: cell junction (GO:0030054);; Cellular Component: presynaptic membrane (GO:0042734);; Molecular Function: RNA binding (GO:0044822);; Cellular Component: postsynaptic membrane (GO:0045211);; Biological Process: protein homooligomerization (GO:0051260);; Cellular Component: extracellular exosome (GO:0070062);;	--	--	--	[R]	General function prediction only	BTB/POZ domain	BTB/POZ domain-containing protein KCTD12 OS=Homo sapiens OX=9606 GN=KCTD12 PE=1 SV=1	S	Function unknown	BTB/POZ domain-containing protein KCTD12 [Homo sapiens]
13	18450000	63050000	loss	ENSG00000102531	[X]	Mobilome: prophages, transposons	Cellular Component: Golgi membrane (GO:0000139);; Cellular Component: acrosomal vesicle (GO:0001669);; Cellular Component: cytosol (GO:0005829);; Biological Process: spermatid development (GO:0007286);; Biological Process: fertilization (GO:0009566);; Cellular Component: vesicle membrane (GO:0012506);; Cellular Component: integral component of membrane (GO:0016021);; Biological Process: single or…	--	--	--	--	--	Fibronectin type III domain;; Purple acid Phosphatase, N-terminal domain;; Uncharacterised conserved protein (DUF2369);; Interferon-alpha/beta receptor, fibronectin type III	Fibronectin type-III domain-containing protein 3A OS=Homo sapiens OX=9606 GN=FNDC3A PE=1 SV=4	S	Function unknown	fibronectin type-III domain-containing protein 3A isoform 1 [Homo sapiens]
13	18450000	63050000	loss	ENSG00000133111	--	--	Molecular Function: DNA binding (GO:0003677);; Molecular Function: transcription factor activity, sequence-specific DNA binding (GO:0003700);; Molecular Function: transcription coactivator activity (GO:0003713);; Cellular Component: nucleus (GO:0005634);; Biological Process: regulation of transcription, DNA-templated (GO:0006355);;	K08063|1.05065e-100|cjc:100393775|K08063 regulatory factor X-associated protein | (RefSeq) RFXAP; regulatory factor X associated protein	Tuberculosis (ko05152);; Antigen processing and presentation (ko04612);; Primary immunodeficiency (ko05340)	ko05152:Tuberculosis;ko05340:Primary immunodeficiency;ko04612:Antigen processing and presentation	--	--	Regulatory factor X-associated C-terminal binding domain	Regulatory factor X-associated protein OS=Homo sapiens OX=9606 GN=RFXAP PE=1 SV=1	K	Transcription	PREDICTED: regulatory factor X-associated protein [Callithrix jacchus]
13	18450000	63050000	loss	ENSG00000102547	--	--	Molecular Function: protein binding (GO:0005515);; Cellular Component: cytosol (GO:0005829);; Biological Process: cell cycle arrest (GO:0007050);; Cellular Component: extracellular exosome (GO:0070062);;	K08272|0|ptr:452718|K08272 calcium binding protein 39 | (RefSeq) CAB39L; calcium binding protein 39 like	AMPK signaling pathway (ko04152);; mTOR signaling pathway (ko04150)	ko04152:AMPK signaling pathway;ko04150:mTOR signaling pathway	[S]	Function unknown	Mo25-like	Calcium-binding protein 39-like OS=Homo sapiens OX=9606 GN=CAB39L PE=1 SV=3	S	Function unknown	PREDICTED: calcium-binding protein 39-like isoform X1 [Cercocebus atys]
13	18450000	63050000	loss	ENSG00000150893	[S]	Function unknown	--	--	--	--	[R]	General function prediction only	Cadherin-like;; Calx-beta domain	FRAS1-related extracellular matrix protein 2 OS=Homo sapiens OX=9606 GN=FREM2 PE=1 SV=2	S	Function unknown	FRAS1 related extracellular matrix protein 2, isoform CRA_b [Homo sapiens]
13	63100000	114364328	loss	ENSG00000118939	--	--	--	K05609|3.0334e-154|umr:103659168|K05609 ubiquitin carboxyl-terminal hydrolase L3 [EC:3.4.19.12] | (RefSeq) UCHL3; ubiquitin C-terminal hydrolase L3	--		[O]	Posttranslational modification, protein turnover, chaperones	Ubiquitin carboxyl-terminal hydrolase, family 1	Ubiquitin carboxyl-terminal hydrolase isozyme L3 OS=Homo sapiens OX=9606 GN=UCHL3 PE=1 SV=1	O	Posttranslational modification, protein turnover, chaperones	ubiquitin carboxyl-terminal hydrolase isozyme L3 isoform X2 [Aotus nancymaae]
13	18450000	63050000	loss	ENSG00000122042	--	--	--	--	--	--	--	--	Ubiquitin-2 like Rad60 SUMO-like	Ubiquitin-like protein 3 OS=Homo sapiens OX=9606 GN=UBL3 PE=1 SV=1	S	Function unknown	PREDICTED: ubiquitin-like protein 3 isoform X2 [Callithrix jacchus]
13	18450000	63050000	loss	ENSG00000102786	--	--	Molecular Function: transmembrane signaling receptor activity (GO:0004888);; Molecular Function: protein binding (GO:0005515);; Biological Process: signal transduction (GO:0007165);; Cellular Component: actin cytoskeleton (GO:0015629);; Biological Process: snRNA processing (GO:0016180);; Cellular Component: integrator complex (GO:0032039);; Biological Process: snRNA transcription from RNA polymer…	K13143|8.23633e-61|rno:361057|K13143 integrator complex subunit 6 | (RefSeq) Ints6, Ddx26, LRRGT00024; integrator complex subunit 6	--		[R]	General function prediction only	von Willebrand factor type A domain;; von Willebrand factor type A domain	Integrator complex subunit 6 OS=Homo sapiens OX=9606 GN=INTS6 PE=1 SV=1	S	Function unknown	integrator complex subunit 6 isoform c [Homo sapiens]
13	18450000	63050000	loss	ENSG00000226792	--	--	--	--	--	--	--	--	--	Uncharacterized protein C13orf42 OS=Homo sapiens OX=9606 GN=C13orf42 PE=4 SV=1	S	Function unknown	uncharacterized protein C13orf42 [Homo sapiens]
13	18450000	63050000	loss	ENSG00000133116	[G]	Carbohydrate transport and metabolism	Molecular Function: beta-glucuronidase activity (GO:0004566);; Molecular Function: signal transducer activity (GO:0004871);; Molecular Function: Ras guanyl-nucleotide exchange factor activity (GO:0005088);; Molecular Function: fibroblast growth factor receptor binding (GO:0005104);; Molecular Function: hormone activity (GO:0005179);; Molecular Function: vitamin D binding (GO:0005499);; Cellular C…	K14756|0|hsa:9365|K14756 klotho [EC:3.2.1.31] | (RefSeq) KL; klotho	Longevity regulating pathway (ko04211);; Starch and sucrose metabolism (ko00500);; Endocrine and other factor-regulated calcium reabsorption (ko04961);; Pentose and glucuronate interconversions (ko00040)	ko00500:Starch and sucrose metabolism;ko04961:Endocrine and other factor-regulated calcium reabsorption;ko04211:Longevity regulating pathway;ko00040:Pentose and glucuronate interconversions	[G]	Carbohydrate transport and metabolism	Glycosyl hydrolase family 1	Klotho OS=Homo sapiens OX=9606 GN=KL PE=1 SV=2	G	Carbohydrate transport and metabolism	Klotho protein (KL) [Homo sapiens]
13	63100000	114364328	loss	ENSG00000102794	[G]	Carbohydrate transport and metabolism	Biological Process: positive regulation of antimicrobial humoral response (GO:0002760);; Cellular Component: mitochondrion (GO:0005739);; Biological Process: embryo implantation (GO:0007566);; Biological Process: negative regulation of NF-kappaB transcription factor activity (GO:0032088);; Biological Process: negative regulation of type I interferon production (GO:0032480);; Biological Process: n…	K17724|0|hsa:730249|K17724 aconitate decarboxylase [EC:4.1.1.6] | (RefSeq) ACOD1, CAD, IRG1; aconitate decarboxylase 1	--		--	--	MmgE/PrpD family	Cis-aconitate decarboxylase OS=Homo sapiens OX=9606 GN=ACOD1 PE=1 SV=1	S	Function unknown	cis-aconitate decarboxylase [Homo sapiens]
13	18450000	63050000	loss	ENSG00000180440	--	--	Cellular Component: integral component of membrane (GO:0016021);;	--	--	--	--	--	Serine-rich and transmembrane domain-containing protein 1	Serine-rich and transmembrane domain-containing protein 1 OS=Homo sapiens OX=9606 GN=SERTM1 PE=4 SV=1	S	Function unknown	Chromosome 13 open reading frame 36 [Homo sapiens]
13	18450000	63050000	loss	ENSG00000151773	--	--	--	--	--	--	--	--	--	Coiled-coil domain-containing protein 122 OS=Homo sapiens OX=9606 GN=CCDC122 PE=2 SV=1	S	Function unknown	coiled-coil domain-containing protein 122 isoform X1 [Aotus nancymaae]
13	63100000	114364328	loss	ENSG00000179399	--	--	Biological Process: retinoid metabolic process (GO:0001523);; Cellular Component: proteinaceous extracellular matrix (GO:0005578);; Cellular Component: extracellular space (GO:0005615);; Cellular Component: Golgi lumen (GO:0005796);; Cellular Component: integral component of plasma membrane (GO:0005887);; Biological Process: glycosaminoglycan biosynthetic process (GO:0006024);; Biological Process…	K08111|0|hsa:2262|K08111 glypican 5 | (RefSeq) GPC5; glypican 5	--		[T]	Signal transduction mechanisms	Glypican	Glypican-5 OS=Homo sapiens OX=9606 GN=GPC5 PE=2 SV=1	O	Posttranslational modification, protein turnover, chaperones	glypican-5 precursor [Homo sapiens]
13	18450000	63050000	loss	ENSG00000102468	--	--	Molecular Function: virus receptor activity (GO:0001618);; Biological Process: temperature homeostasis (GO:0001659);; Molecular Function: G-protein alpha-subunit binding (GO:0001965);; Molecular Function: G-protein coupled serotonin receptor activity (GO:0004993);; Cellular Component: cytosol (GO:0005829);; Cellular Component: integral component of plasma membrane (GO:0005887);; Cellular Componen…	K04157|0|hsa:3356|K04157 5-hydroxytryptamine receptor 2 | (RefSeq) HTR2A, 5-HT2A, HTR2; 5-hydroxytryptamine receptor 2A	Inflammatory mediator regulation of TRP channels (ko04750);; Gap junction (ko04540);; Calcium signaling pathway (ko04020);; Neuroactive ligand-receptor interaction (ko04080);; Serotonergic synapse (ko04726)	ko04020:Calcium signaling pathway;ko04540:Gap junction;ko04080:Neuroactive ligand-receptor interaction;ko04750:Inflammatory mediator regulation of TRP channels;ko04726:Serotonergic synapse	[R]	General function prediction only	7 transmembrane receptor (rhodopsin family);; Serpentine type 7TM GPCR chemoreceptor Srsx;; Olfactory receptor	5-hydroxytryptamine receptor 2A OS=Homo sapiens OX=9606 GN=HTR2A PE=1 SV=2	U	Intracellular trafficking, secretion, and vesicular transport	5-hydroxytryptamine receptor 2A isoform 1 [Homo sapiens]
13	18450000	63050000	loss	ENSG00000120697	[N]	Cell motility	Molecular Function: dolichyl-phosphate-mannose-protein mannosyltransferase activity (GO:0004169);; Molecular Function: oligosaccharyl transferase activity (GO:0004576);; Molecular Function: dolichyl-phosphate beta-glucosyltransferase activity (GO:0004581);; Molecular Function: dolichyl-phosphate beta-D-mannosyltransferase activity (GO:0004582);; Cellular Component: endoplasmic reticulum membrane …	K00729|0|hsa:29880|K00729 dolichyl-phosphate beta-glucosyltransferase [EC:2.4.1.117] | (RefSeq) ALG5, bA421P11.2; ALG5, dolichyl-phosphate beta-glucosyltransferase	N-Glycan biosynthesis (ko00510)	ko00510:N-Glycan biosynthesis	[R]	General function prediction only	Glycosyl transferase family 2;; Glycosyltransferase like family 2	Dolichyl-phosphate beta-glucosyltransferase OS=Homo sapiens OX=9606 GN=ALG5 PE=1 SV=1	M	Cell wall/membrane/envelope biogenesis	PREDICTED: dolichyl-phosphate beta-glucosyltransferase isoform X1 [Chlorocebus sabaeus]
13	18450000	63050000	loss	ENSG00000136100	--	--	--	K12190|0|hsa:51028|K12190 ESCRT-II complex subunit VPS36 | (RefSeq) VPS36, C13orf9, CGI-145, EAP45; vacuolar protein sorting 36 homolog	Endocytosis (ko04144)	ko04144:Endocytosis	[U]	Intracellular trafficking, secretion, and vesicular transport	EAP30/Vps36 family;; Vacuolar protein sorting protein 36 Vps36	Vacuolar protein-sorting-associated protein 36 OS=Homo sapiens OX=9606 GN=VPS36 PE=1 SV=1	U	Intracellular trafficking, secretion, and vesicular transport	PREDICTED: vacuolar protein-sorting-associated protein 36 [Saimiri boliviensis boliviensis]
13	63100000	114364328	loss	ENSG00000065150	--	--	Biological Process: obsolete protein import into nucleus, docking (GO:0000059);; Biological Process: protein import into nucleus, translocation (GO:0000060);; Molecular Function: GTPase inhibitor activity (GO:0005095);; Cellular Component: nuclear pore (GO:0005643);; Cellular Component: nucleoplasm (GO:0005654);; Cellular Component: nucleolus (GO:0005730);; Cellular Component: Golgi apparatus (GO…	K20222|0|rno:306182|K20222 importin-5 | (RefSeq) Ipo5, Kpnb3, Ranbp5; importin 5	--		[YU]	--	HEAT repeats;; HEAT repeat;; HEAT-like repeat;; Vacuolar 14 Fab1-binding region;; Domain of unknown function (DUF3385);; non-SMC mitotic condensation complex subunit 1;; Importin-beta N-terminal domain;; Armadillo/beta-catenin-like repeat	Importin-5 OS=Homo sapiens OX=9606 GN=IPO5 PE=1 SV=4	U	Intracellular trafficking, secretion, and vesicular transport	importin-5 [Homo sapiens]
13	18450000	63050000	loss	ENSG00000139597	[R]	General function prediction only	--	--	--	--	[L]	Replication, recombination and repair	AAA domain;; Zeta toxin	NEDD4-binding protein 2-like 1 OS=Homo sapiens OX=9606 GN=N4BP2L1 PE=2 SV=1	S	Function unknown	PREDICTED: NEDD4-binding protein 2-like 1 isoform X1 [Gorilla gorilla gorilla]
13	18450000	63050000	loss	ENSG00000173988	[K]	Transcription	--	--	--	--	--	--	Leucine rich repeat;; Leucine Rich repeats (2 copies);; Leucine Rich Repeat	Leucine-rich repeat-containing protein 63 OS=Homo sapiens OX=9606 GN=LRRC63 PE=2 SV=2	S	Function unknown	leucine-rich repeat-containing protein 63 [Homo sapiens]
13	63100000	114364328	loss	ENSG00000204899	--	--	Molecular Function: protein binding (GO:0005515);; Cellular Component: centrosome (GO:0005813);; Cellular Component: spindle (GO:0005819);; Cellular Component: gamma-tubulin ring complex (GO:0008274);; Biological Process: gamma-tubulin complex localization (GO:0033566);;	K18633|2.61678e-31|ptr:735745|K18633 mitotic-spindle organizing protein 1 | (RefSeq) MZT1; mitotic spindle organizing protein 1	--		--	--	Mitotic-spindle organizing gamma-tubulin ring associated	Mitotic-spindle organizing protein 1 OS=Homo sapiens OX=9606 GN=MZT1 PE=1 SV=2	O	Posttranslational modification, protein turnover, chaperones	PREDICTED: mitotic-spindle organizing protein 1 [Cebus capucinus imitator]
13	63100000	114364328	loss	ENSG00000185950	--	--	Biological Process: MAPK cascade (GO:0000165);; Biological Process: positive regulation of mesenchymal cell proliferation (GO:0002053);; Biological Process: negative regulation of B cell apoptotic process (GO:0002903);; Molecular Function: signal transducer activity (GO:0004871);; Molecular Function: Ras guanyl-nucleotide exchange factor activity (GO:0005088);; Molecular Function: insulin recepto…	K07187|0|hsa:8660|K07187 insulin receptor substrate 2 | (RefSeq) IRS2, IRS-2; insulin receptor substrate 2	Longevity regulating pathway - multiple species (ko04213);; Non-alcoholic fatty liver disease (NAFLD) (ko04932);; Insulin resistance (ko04931);; Type II diabetes mellitus (ko04930);; Regulation of lipolysis in adipocytes (ko04923);; cGMP-PKG signaling pathway (ko04022);; Insulin signaling pathway (ko04910);; AMPK signaling pathway (ko04152);; MicroRNAs in cancer (ko05206);; Longevity regulating p…	ko04213:Longevity regulating pathway - multiple species;ko04068:FoxO signaling pathway;ko04211:Longevity regulating pathway;ko04152:AMPK signaling pathway;ko04930:Type II diabetes mellitus;ko04022:cGMP-PKG signaling pathway;ko04931:Insulin resistance;ko04932:Non-alcoholic fatty liver disease (NAFLD);ko04923:Regulation of lipolysis in adipocytes;ko04920:Adipocytokine signaling pathway;ko05206:Micr…	--	--	PTB domain (IRS-1 type);; PH domain	Insulin receptor substrate 2 OS=Homo sapiens OX=9606 GN=IRS2 PE=1 SV=2	T	Signal transduction mechanisms	insulin receptor substrate 2 [Homo sapiens]
13	18450000	63050000	loss	ENSG00000152207	--	--	--	K04323|0|hsa:57105|K04323 cysteinyl leukotriene receptor 2 | (RefSeq) CYSLTR2, CYSLT2, CYSLT2R, GPCR21, HG57, HPN321, KPG_011, PSEC0146, hGPCR21; cysteinyl leukotriene receptor 2	Calcium signaling pathway (ko04020);; Neuroactive ligand-receptor interaction (ko04080)	ko04020:Calcium signaling pathway;ko04080:Neuroactive ligand-receptor interaction	--	--	7 transmembrane receptor (rhodopsin family);; Taste receptor protein (TAS2R)	Cysteinyl leukotriene receptor 2 OS=Homo sapiens OX=9606 GN=CYSLTR2 PE=1 SV=1	U	Intracellular trafficking, secretion, and vesicular transport	cysteinyl leukotriene receptor 2 [Homo sapiens]
13	18450000	63050000	loss	ENSG00000172915	[R]	General function prediction only	Cellular Component: trans-Golgi network (GO:0005802);; Cellular Component: cytosol (GO:0005829);; Cellular Component: plasma membrane (GO:0005886);; Biological Process: protein localization (GO:0008104);; Molecular Function: protein kinase binding (GO:0019901);;	--	--	--	[U]	Intracellular trafficking, secretion, and vesicular transport	Beige/BEACH domain;; Domain of unknown function (DUF4704);; Domain of Unknown Function (DUF1088);; PH domain associated with Beige/BEACH;; Concanavalin A-like lectin/glucanases superfamily;; WD domain, G-beta repeat	Neurobeachin OS=Homo sapiens OX=9606 GN=NBEA PE=1 SV=3	S	Function unknown	neurobeachin isoform 1 [Homo sapiens]
13	18450000	63050000	loss	ENSG00000175664	--	--	--	--	--	--	--	--	--	Testis-expressed protein 26 OS=Homo sapiens OX=9606 GN=TEX26 PE=2 SV=1	S	Function unknown	testis-expressed protein 26 isoform a [Homo sapiens]
13	18450000	63050000	loss	ENSG00000133103	--	--	Biological Process: ER to Golgi vesicle-mediated transport (GO:0006888);; Biological Process: intra-Golgi vesicle-mediated transport (GO:0006891);; Biological Process: protein transport (GO:0015031);; Cellular Component: Golgi transport complex (GO:0017119);; Cellular Component: trans-Golgi network membrane (GO:0032588);; Biological Process: glycosylation (GO:0070085);;	K20293|0|pps:100985815|K20293 conserved oligomeric Golgi complex subunit 6 | (RefSeq) COG6; component of oligomeric golgi complex 6	--		[S]	Function unknown	Conserved oligomeric complex COG6	Conserved oligomeric Golgi complex subunit 6 OS=Homo sapiens OX=9606 GN=COG6 PE=1 SV=2	U	Intracellular trafficking, secretion, and vesicular transport	conserved oligomeric Golgi complex subunit 6 isoform X2 [Pongo abelii]
13	63100000	114364328	loss	ENSG00000175198	[I]	Lipid transport and metabolism	Molecular Function: biotin carboxylase activity (GO:0004075);; Molecular Function: propionyl-CoA carboxylase activity (GO:0004658);; Molecular Function: ATP binding (GO:0005524);; Cellular Component: mitochondrial matrix (GO:0005759);; Cellular Component: cytosol (GO:0005829);; Biological Process: biotin metabolic process (GO:0006768);; Molecular Function: biotin binding (GO:0009374);; Biological…	K01965|0|hsa:5095|K01965 propionyl-CoA carboxylase alpha chain [EC:6.4.1.3] | (RefSeq) PCCA; propionyl-CoA carboxylase alpha subunit	Glyoxylate and dicarboxylate metabolism (ko00630);; Propanoate metabolism (ko00640);; Carbon metabolism (ko01200);; Valine, leucine and isoleucine degradation (ko00280)	ko00640:Propanoate metabolism;ko00630:Glyoxylate and dicarboxylate metabolism;ko01200:Carbon metabolism;ko00280:Valine, leucine and isoleucine degradation	[IE]	--	Carbamoyl-phosphate synthase L chain, ATP binding domain;; Biotin carboxylase, N-terminal domain;; Biotin carboxylase C-terminal domain;; Biotin-requiring enzyme;; D-ala D-ala ligase C-terminus;; Biotin-lipoyl like;; ATP-grasp domain;; RimK-like ATP-grasp domain	Propionyl-CoA carboxylase alpha chain, mitochondrial OS=Homo sapiens OX=9606 GN=PCCA PE=1 SV=4	I	Lipid transport and metabolism	propionyl-CoA carboxylase alpha chain, mitochondrial isoform a precursor [Homo sapiens]
13	18450000	63050000	loss	ENSG00000139734	--	--	--	K05745|0|hsa:81624|K05745 diaphanous 3 | (RefSeq) DIAPH3, AN, AUNA1, DIA2, DRF3, NSDAN, diap3, mDia2; diaphanous related formin 3	Regulation of actin cytoskeleton (ko04810)	ko04810:Regulation of actin cytoskeleton	[TZ]	--	Formin Homology 2 Domain;; Diaphanous FH3 Domain;; Diaphanous GTPase-binding Domain;; DRF Autoregulatory Domain	Protein diaphanous homolog 3 OS=Homo sapiens OX=9606 GN=DIAPH3 PE=1 SV=4	S	Function unknown	protein diaphanous homolog 3 isoform a [Homo sapiens]
13	63100000	114364328	loss	ENSG00000102452	--	--	Molecular Function: voltage-gated ion channel activity (GO:0005244);; Molecular Function: sodium channel activity (GO:0005272);; Molecular Function: protein binding (GO:0005515);; Cellular Component: plasma membrane (GO:0005886);; Biological Process: calcium ion transport (GO:0006816);; Cellular Component: integral component of membrane (GO:0016021);; Biological Process: regulation of ion transme…	--	--	--	[PT]	--	Ion transport protein;; Polycystin cation channel	Sodium leak channel non-selective protein OS=Homo sapiens OX=9606 GN=NALCN PE=1 SV=1	U	Intracellular trafficking, secretion, and vesicular transport	PREDICTED: sodium leak channel non-selective protein isoform X1 [Homo sapiens]
13	18450000	63050000	loss	ENSG00000123179	--	--	--	--	--	--	[I]	Lipid transport and metabolism	Emopamil binding protein;; Emopamil binding protein	Emopamil-binding protein-like OS=Homo sapiens OX=9606 GN=EBPL PE=1 SV=1	I	Lipid transport and metabolism	PREDICTED: emopamil-binding protein-like [Gorilla gorilla gorilla]
13	18450000	63050000	loss	ENSG00000133112	--	--	Molecular Function: calcium ion binding (GO:0005509);; Cellular Component: extracellular space (GO:0005615);; Cellular Component: nucleoplasm (GO:0005654);; Cellular Component: multivesicular body (GO:0005771);; Biological Process: calcium ion transport (GO:0006816);; Biological Process: cellular calcium ion homeostasis (GO:0006874);; Molecular Function: transcription factor binding (GO:0008134);…	--	--	--	[DZ]	--	Translationally controlled tumour protein	Translationally-controlled tumor protein OS=Homo sapiens OX=9606 GN=TPT1 PE=1 SV=1	S	Function unknown	translationally-controlled tumor protein isoform 1 [Homo sapiens]
13	63100000	114364328	loss	ENSG00000139793	--	--	--	K14943|0|nle:100606877|K14943 muscleblind | (RefSeq) MBNL2; muscleblind like splicing regulator 2	--		[K]	Transcription	Zinc finger C-x8-C-x5-C-x3-H type (and similar);; RNA-binding, Nab2-type zinc finger	Muscleblind-like protein 2 OS=Homo sapiens OX=9606 GN=MBNL2 PE=1 SV=2	S	Function unknown	muscleblind-like protein MLP1 [Homo sapiens]
13	18450000	63050000	loss	ENSG00000102804	--	--	Molecular Function: transcription factor activity, sequence-specific DNA binding (GO:0003700);; Molecular Function: protein binding (GO:0005515);; Cellular Component: nucleus (GO:0005634);; Cellular Component: cytoplasm (GO:0005737);; Biological Process: regulation of transcription, DNA-templated (GO:0006355);; Biological Process: transcription from RNA polymerase II promoter (GO:0006366);;	--	--	--	[K]	Transcription	TSC-22/dip/bun family	TSC22 domain family protein 1 OS=Homo sapiens OX=9606 GN=TSC22D1 PE=1 SV=3	S	Function unknown	TSC22 domain family protein 1 isoform 1 [Homo sapiens]
13	18450000	63050000	loss	ENSG00000133104	--	--	Cellular Component: mitochondrial outer membrane (GO:0005741);; Cellular Component: lipid droplet (GO:0005811);; Cellular Component: plasma membrane (GO:0005886);; Biological Process: abscission (GO:0009838);; Cellular Component: midbody (GO:0030496);; Biological Process: negative regulation of BMP signaling pathway (GO:0030514);; Molecular Function: ubiquitin protein ligase binding (GO:0031625);…	K19366|0|hsa:23111|K19366 spartin | (RefSeq) SPG20, SPARTIN, TAHCCP1; spastic paraplegia 20 (Troyer syndrome)	Endocytosis (ko04144)	ko04144:Endocytosis	[S]	Function unknown	Senescence-associated protein	Spartin OS=Homo sapiens OX=9606 GN=SPART PE=1 SV=1	S	Function unknown	spartin [Homo sapiens]
13	18450000	63050000	loss	ENSG00000120694	[O]	Posttranslational modification, protein turnover, chaperones	Molecular Function: adenyl-nucleotide exchange factor activity (GO:0000774);; Molecular Function: ATP binding (GO:0005524);; Cellular Component: nucleoplasm (GO:0005654);; Cellular Component: cytosol (GO:0005829);; Cellular Component: microtubule (GO:0005874);; Biological Process: receptor-mediated endocytosis (GO:0006898);; Biological Process: response to unfolded protein (GO:0006986);; Molecula…	K09485|0|pps:100972655|K09485 heat shock protein 110kDa | (RefSeq) HSPH1; heat shock protein family H (Hsp110) member 1	Protein processing in endoplasmic reticulum (ko04141)	ko04141:Protein processing in endoplasmic reticulum	[O]	Posttranslational modification, protein turnover, chaperones	Hsp70 protein;; MreB/Mbl protein	Heat shock protein 105 kDa OS=Homo sapiens OX=9606 GN=HSPH1 PE=1 SV=1	O	Posttranslational modification, protein turnover, chaperones	HSPH1 isoform 3 [Pan troglodytes]
13	18450000	63050000	loss	ENSG00000132952	--	--	Cellular Component: extracellular space (GO:0005615);; Biological Process: cell proliferation (GO:0008283);; Cellular Component: Cajal body (GO:0015030);; Biological Process: protein desumoylation (GO:0016926);; Biological Process: Cajal body organization (GO:0030576);; Molecular Function: SUMO binding (GO:0032183);; Molecular Function: ubiquitin binding (GO:0043130);; Molecular Function: SUMO-sp…	--	--	--	--	--	Domain of unknown function (DUF4650);; Ubiquitin-specific peptidase-like, SUMO isopeptidase	SUMO-specific isopeptidase USPL1 OS=Homo sapiens OX=9606 GN=USPL1 PE=1 SV=1	O	Posttranslational modification, protein turnover, chaperones	PREDICTED: SUMO-specific isopeptidase USPL1 isoform X2 [Homo sapiens]
13	63100000	114364328	loss	ENSG00000102805	--	--	Molecular Function: protein binding (GO:0005515);; Molecular Function: mannose binding (GO:0005537);; Cellular Component: lysosomal membrane (GO:0005765);; Cellular Component: vacuolar lumen (GO:0005775);; Cellular Component: endoplasmic reticulum (GO:0005783);; Cellular Component: Golgi apparatus (GO:0005794);; Biological Process: signal peptide processing (GO:0006465);; Biological Process: lyso…	K12390|0|nle:100581316|K12390 ceroid-lipofuscinosis neuronal protein 5 | (RefSeq) CLN5; ceroid-lipofuscinosis, neuronal 5	Lysosome (ko04142)	ko04142:Lysosome	--	--	Ceroid-lipofuscinosis neuronal protein 5	Ceroid-lipofuscinosis neuronal protein 5 OS=Homo sapiens OX=9606 GN=CLN5 PE=1 SV=2	O	Posttranslational modification, protein turnover, chaperones	PREDICTED: ceroid-lipofuscinosis neuronal protein 5 [Nomascus leucogenys]
13	63100000	114364328	loss	ENSG00000125257	[V]	Defense mechanisms	Biological Process: platelet degranulation (GO:0002576);; Molecular Function: ATP binding (GO:0005524);; Molecular Function: ATPase activity, coupled to transmembrane movement of ions, phosphorylative mechanism (GO:0015662);; Cellular Component: integral component of membrane (GO:0016021);; Cellular Component: basolateral plasma membrane (GO:0016323);; Molecular Function: 15-hydroxyprostaglandin …	K05673|0|hsa:10257|K05673 ATP-binding cassette, subfamily C (CFTR/MRP), member 4 | (RefSeq) ABCC4, MOAT-B, MOATB, MRP4; ATP binding cassette subfamily C member 4	Bile secretion (ko04976);; ABC transporters (ko02010);; cAMP signaling pathway (ko04024)	ko04976:Bile secretion;ko02010:ABC transporters;ko04024:cAMP signaling pathway	[Q]	Secondary metabolites biosynthesis, transport and catabolism	ABC transporter transmembrane region;; ABC transporter;; ABC transporter transmembrane region;; ABC transporter;; ABC transporter	Multidrug resistance-associated protein 4 OS=Homo sapiens OX=9606 GN=ABCC4 PE=1 SV=3	V	Defense mechanisms	PREDICTED: multidrug resistance-associated protein 4 isoform X2 [Homo sapiens]
13	63100000	114364328	loss	ENSG00000134897	--	--	Molecular Function: single-stranded DNA binding (GO:0003697);; Molecular Function: endonuclease activity (GO:0004519);; Cellular Component: extracellular space (GO:0005615);; Cellular Component: nucleus (GO:0005634);; Cellular Component: cytoplasm (GO:0005737);; Biological Process: nucleotide-excision repair (GO:0006289);; Biological Process: nucleic acid phosphodiester bond hydrolysis (GO:009030…	--	--	--	--	--	--	Basic immunoglobulin-like variable motif-containing protein OS=Homo sapiens OX=9606 GN=BIVM PE=2 SV=3	S	Function unknown	PREDICTED: basic immunoglobulin-like variable motif-containing protein isoform X1 [Rhinopithecus roxellana]
13	18450000	63050000	loss	ENSG00000102780	--	--	Molecular Function: diacylglycerol kinase activity (GO:0004143);; Molecular Function: ATP binding (GO:0005524);; Cellular Component: endosome (GO:0005768);; Cellular Component: plasma membrane (GO:0005886);; Biological Process: protein kinase C-activating G-protein coupled receptor signaling pathway (GO:0007205);; Biological Process: phosphorylation (GO:0016310);; Biological Process: platelet act…	K00901|0|hsa:160851|K00901 diacylglycerol kinase (ATP) [EC:2.7.1.107] | (RefSeq) DGKH, DGKeta; diacylglycerol kinase eta	Phosphatidylinositol signaling system (ko04070);; Glycerolipid metabolism (ko00561);; Choline metabolism in cancer (ko05231);; Glycerophospholipid metabolism (ko00564);; Phospholipase D signaling pathway (ko04072)	ko00564:Glycerophospholipid metabolism;ko00561:Glycerolipid metabolism;ko05231:Choline metabolism in cancer;ko04070:Phosphatidylinositol signaling system;ko04072:Phospholipase D signaling pathway	[I]	Lipid transport and metabolism	Diacylglycerol kinase accessory domain;; Diacylglycerol kinase catalytic domain;; Phorbol esters/diacylglycerol binding domain (C1 domain);; PH domain	Diacylglycerol kinase eta OS=Homo sapiens OX=9606 GN=DGKH PE=1 SV=1	T	Signal transduction mechanisms	diacylglycerol kinase eta isoform 1 [Homo sapiens]
13	18450000	63050000	loss	ENSG00000139684	[V]	Defense mechanisms	--	K01070|4.80362e-70|ggo:101127827|K01070 S-formylglutathione hydrolase [EC:3.1.2.12] | (RefSeq) ESD; esterase D	Carbon metabolism (ko01200)	ko01200:Carbon metabolism	[R]	General function prediction only	Putative esterase	S-formylglutathione hydrolase OS=Homo sapiens OX=9606 GN=ESD PE=1 SV=2	S	Function unknown	ESD isoform 4 [Pan troglodytes]
13	63100000	114364328	loss	ENSG00000125247	[M]	Cell wall/membrane/envelope biogenesis	Cellular Component: integral component of membrane (GO:0016021);;	--	--	--	[R]	General function prediction only	Tetratricopeptide repeat;; Domain of unknown function (DUF1736);; Tetratricopeptide repeat;; Tetratricopeptide repeat;; Tetratricopeptide repeat;; Tetratricopeptide repeat;; TPR repeat;; Tetratricopeptide repeat;; Tetratricopeptide repeat;; Tetratricopeptide repeat;; Tetratricopeptide repeat;; Tetratricopeptide repeat	Transmembrane and TPR repeat-containing protein 4 OS=Homo sapiens OX=9606 GN=TMTC4 PE=2 SV=2	S	Function unknown	transmembrane and TPR repeat-containing protein 4 isoform 1 [Homo sapiens]
13	63100000	114364328	loss	ENSG00000152767	--	--	--	K17477|0|hsa:10160|K17477 FERM, RhoGEF and pleckstrin domain-containing protein 1 | (RefSeq) FARP1, CDEP, FARP1-IT1, PLEKHC2, PPP1R75; FERM, ARH/RhoGEF and pleckstrin domain protein 1	--		[T]	Signal transduction mechanisms	FERM C-terminal PH-like domain;; FERM adjacent (FA);; FERM N-terminal domain;; FERM central domain	FERM, ARHGEF and pleckstrin domain-containing protein 1 OS=Homo sapiens OX=9606 GN=FARP1 PE=1 SV=1	T	Signal transduction mechanisms	FARP1 isoform 5, partial [Pan troglodytes]
13	18450000	63050000	loss	ENSG00000136152	--	--	--	K20290|0|ptr:452579|K20290 conserved oligomeric Golgi complex subunit 3 | (RefSeq) COG3; component of oligomeric golgi complex 3	--		[U]	Intracellular trafficking, secretion, and vesicular transport	Sec34-like family	Conserved oligomeric Golgi complex subunit 3 OS=Homo sapiens OX=9606 GN=COG3 PE=1 SV=3	U	Intracellular trafficking, secretion, and vesicular transport	RecName: Full=Conserved oligomeric Golgi complex subunit 3; Short=COG complex subunit 3; AltName: Full=Component of oligomeric Golgi complex 3; AltName: Full=Vesicle-docking protein SEC34 homolog; AltName: Full=p94
13	18450000	63050000	loss	ENSG00000151778	--	--	--	--	--	--	[S]	Function unknown	Ribosome associated membrane protein RAMP4	Stress-associated endoplasmic reticulum protein 2 OS=Homo sapiens OX=9606 GN=SERP2 PE=1 SV=1	U	Intracellular trafficking, secretion, and vesicular transport	PREDICTED: stress-associated endoplasmic reticulum protein 2 isoform X2 [Cercocebus atys]
13	63100000	114364328	loss	ENSG00000136122	--	--	--	K16831|0|hsa:79866|K16831 protein aurora borealis | (RefSeq) BORA, C13orf34; bora, aurora kinase A activator	--		--	--	Protein aurora borealis N-terminus	Protein aurora borealis OS=Homo sapiens OX=9606 GN=BORA PE=1 SV=2	S	Function unknown	protein aurora borealis isoform 2 [Homo sapiens]
13	18450000	63050000	loss	ENSG00000120662	[J]	Translation, ribosomal structure and biogenesis	Cellular Component: mitochondrion (GO:0005739);; Biological Process: regulation of translational termination (GO:0006449);; Molecular Function: translation release factor activity, codon specific (GO:0016149);; Molecular Function: ribosome binding (GO:0043022);; Biological Process: mitochondrial translational termination (GO:0070126);;	K02835|0|ptr:452558|K02835 peptide chain release factor 1 | (RefSeq) MTRF1; mitochondrial translation release factor 1	--		[J]	Translation, ribosomal structure and biogenesis	PCRF domain;; RF-1 domain	Peptide chain release factor 1, mitochondrial OS=Homo sapiens OX=9606 GN=MTRF1 PE=1 SV=2	J	Translation, ribosomal structure and biogenesis	PREDICTED: peptide chain release factor 1, mitochondrial isoform X3 [Homo sapiens]
13	63100000	114364328	loss	ENSG00000102595	--	--	Molecular Function: UDP-glucose:glycoprotein glucosyltransferase activity (GO:0003980);; Molecular Function: protein binding (GO:0005515);; Cellular Component: endoplasmic reticulum lumen (GO:0005788);; Cellular Component: endoplasmic reticulum-Golgi intermediate compartment (GO:0005793);; Biological Process: protein glycosylation (GO:0006486);; Cellular Component: endoplasmic reticulum quality c…	K11718|0|hsa:55757|K11718 UDP-glucose:glycoprotein glucosyltransferase [EC:2.4.1.-] | (RefSeq) UGGT2, HUGT2, UGCGL2, UGT2; UDP-glucose glycoprotein glucosyltransferase 2	Protein processing in endoplasmic reticulum (ko04141)	ko04141:Protein processing in endoplasmic reticulum	[G]	Carbohydrate transport and metabolism	UDP-glucose:Glycoprotein Glucosyltransferase;; Glycosyl transferase family 8	UDP-glucose:glycoprotein glucosyltransferase 2 OS=Homo sapiens OX=9606 GN=UGGT2 PE=1 SV=4	O	Posttranslational modification, protein turnover, chaperones	UDP-glucose:glycoprotein glucosyltransferase 2 precursor [Homo sapiens]
13	63100000	114364328	loss	ENSG00000134882	--	--	Molecular Function: protein binding (GO:0005515);; Cellular Component: endoplasmic reticulum membrane (GO:0005789);; Cellular Component: integral component of membrane (GO:0016021);; Biological Process: protein localization to endoplasmic reticulum (GO:0070972);; Biological Process: negative regulation of retrograde protein transport, ER to cytosol (GO:1904153);;	--	--	--	[S]	Function unknown	UBA/TS-N domain	Ubiquitin-associated domain-containing protein 2 OS=Homo sapiens OX=9606 GN=UBAC2 PE=1 SV=1	S	Function unknown	ubiquitin-associated domain-containing protein 2 isoform 2 [Homo sapiens]
13	18450000	63050000	loss	ENSG00000169840	--	--	--	K09310|1.57467e-136|ptr:467245|K09310 homeobox protein GSH | (RefSeq) GSX1, GSH1; GS homeobox 1	--		[R]	General function prediction only	Homeobox domain	GS homeobox 1 OS=Homo sapiens OX=9606 GN=GSX1 PE=2 SV=1	K	Transcription	GS homeobox 1 [Homo sapiens]
13	63100000	114364328	loss	ENSG00000125255	[R]	General function prediction only	Cellular Component: integral component of plasma membrane (GO:0005887);; Cellular Component: microvillus (GO:0005902);; Biological Process: sodium ion transport (GO:0006814);; Molecular Function: bile acid:sodium symporter activity (GO:0008508);; Biological Process: bile acid and bile salt transport (GO:0015721);; Cellular Component: apical plasma membrane (GO:0016324);; Biological Process: trans…	K14342|0|pon:100171962|K14342 solute carrier family 10 (sodium/bile acid cotransporter), member 2 | (RefSeq) SLC10A2; solute carrier family 10 member 2	Bile secretion (ko04976)	ko04976:Bile secretion	[P]	Inorganic ion transport and metabolism	Sodium Bile acid symporter family	Ileal sodium/bile acid cotransporter OS=Homo sapiens OX=9606 GN=SLC10A2 PE=1 SV=2	S	Function unknown	ileal sodium/bile acid cotransporter [Pongo abelii]
13	18450000	63050000	loss	ENSG00000023516	--	--	--	K16527|0|hsa:11215|K16527 A-kinase anchor protein 11 | (RefSeq) AKAP11, AKAP-11, AKAP220, PPP1R44, PRKA11; A-kinase anchoring protein 11	--		--	--	--	A-kinase anchor protein 11 OS=Homo sapiens OX=9606 GN=AKAP11 PE=1 SV=1	T	Signal transduction mechanisms	A-kinase anchor protein 11 [Homo sapiens]
13	18450000	63050000	loss	ENSG00000253309	[O]	Posttranslational modification, protein turnover, chaperones	Molecular Function: serine-type endopeptidase inhibitor activity (GO:0004867);; Cellular Component: extracellular space (GO:0005615);; Biological Process: negative regulation of endopeptidase activity (GO:0010951);;	--	--	--	[V]	Defense mechanisms	Serpin (serine protease inhibitor)	Serpin E3 OS=Homo sapiens OX=9606 GN=SERPINE3 PE=2 SV=2	O	Posttranslational modification, protein turnover, chaperones	hCG2020343, isoform CRA_b [Homo sapiens]
13	18450000	63050000	loss	ENSG00000123191	[P]	Inorganic ion transport and metabolism	--	K17686|0|hsa:540|K17686 Cu+-exporting ATPase [EC:3.6.3.54] | (RefSeq) ATP7B, PWD, WC1, WD, WND; ATPase copper transporting beta	Mineral absorption (ko04978);; Platinum drug resistance (ko01524)	ko04978:Mineral absorption;ko01524:Platinum drug resistance	[P]	Inorganic ion transport and metabolism	Heavy-metal-associated domain;; haloacid dehalogenase-like hydrolase;; E1-E2 ATPase;; haloacid dehalogenase-like hydrolase	Copper-transporting ATPase 2 OS=Homo sapiens OX=9606 GN=ATP7B PE=1 SV=4	P	Inorganic ion transport and metabolism	copper-transporting ATPase 2 isoform a [Homo sapiens]
13	63100000	114364328	loss	ENSG00000134864	[R]	General function prediction only	Molecular Function: gamma-glutamylcyclotransferase activity (GO:0003839);; Molecular Function: protein binding (GO:0005515);; Biological Process: cellular modified amino acid catabolic process (GO:0042219);; Cellular Component: extracellular exosome (GO:0070062);;	K19761|1.52973e-89|hsa:87769|K19761 gamma-glutamylaminecyclotransferase [EC:2.3.2.-] | (RefSeq) GGACT, A2LD1; gamma-glutamylamine cyclotransferase	--		[S]	Function unknown	Gamma-glutamyl cyclotransferase, AIG2-like	Gamma-glutamylaminecyclotransferase OS=Homo sapiens OX=9606 GN=GGACT PE=1 SV=2	S	Function unknown	A2LD1 protein, partial [Homo sapiens]
13	18450000	63050000	loss	ENSG00000281883	[P]	Inorganic ion transport and metabolism	--	K05810|5.00565e-81|hsa:144811|K05810 laccase domain-containing protein | (RefSeq) LACC1, C13orf31, FAMIN; laccase domain containing 1	--		--	--	Multi-copper polyphenol oxidoreductase laccase	Laccase domain-containing protein 1 OS=Homo sapiens OX=9606 GN=LACC1 PE=1 SV=1	S	Function unknown	T0067485 isoform 1, partial [Pan troglodytes]
13	18450000	63050000	loss	ENSG00000133115	[O]	Posttranslational modification, protein turnover, chaperones	Cellular Component: plasma membrane (GO:0005886);; Cellular Component: cilium (GO:0005929);; Biological Process: signal transduction (GO:0007165);; Cellular Component: integral component of membrane (GO:0016021);; Cellular Component: membrane raft (GO:0045121);;	K17286|0|ptr:467267|K17286 erythrocyte band 7 integral membrane protein | (RefSeq) STOML3; stomatin like 3	--		[C]	Energy production and conversion	SPFH domain / Band 7 family	Stomatin-like protein 3 OS=Homo sapiens OX=9606 GN=STOML3 PE=1 SV=1	O	Posttranslational modification, protein turnover, chaperones	stomatin-like protein 3 isoform 1 [Homo sapiens]
13	18450000	63050000	loss	ENSG00000136147	--	--	--	--	--	--	[K]	Transcription	PHD-like zinc-binding domain;; PHD-zinc-finger like domain	PHD finger protein 11 OS=Homo sapiens OX=9606 GN=PHF11 PE=1 SV=3	S	Function unknown	SETDB2-PHF11 protein [Homo sapiens]
13	18450000	63050000	loss	ENSG00000136108	--	--	--	K16769|0|hsa:26586|K16769 cytoskeleton-associated protein 2 | (RefSeq) CKAP2, LB1, TMAP, se20-10; cytoskeleton associated protein 2	--		--	--	Cytoskeleton-associated protein 2 C-terminus	Cytoskeleton-associated protein 2 OS=Homo sapiens OX=9606 GN=CKAP2 PE=1 SV=1	S	Function unknown	cytoskeleton-associated protein 2 isoform 2 [Homo sapiens]
13	63100000	114364328	loss	ENSG00000080166	--	--	--	K01827|0|hsa:1638|K01827 dopachrome tautomerase [EC:5.3.3.12] | (RefSeq) DCT, TRP-2, TYRP2; dopachrome tautomerase	Tyrosine metabolism (ko00350);; Melanogenesis (ko04916)	ko00350:Tyrosine metabolism;ko04916:Melanogenesis	--	--	Common central domain of tyrosinase	L-dopachrome tautomerase OS=Homo sapiens OX=9606 GN=DCT PE=1 SV=1	U	Intracellular trafficking, secretion, and vesicular transport	L-dopachrome tautomerase isoform 1 precursor [Homo sapiens]
13	63100000	114364328	loss	ENSG00000183098	--	--	Biological Process: retinoid metabolic process (GO:0001523);; Cellular Component: proteinaceous extracellular matrix (GO:0005578);; Cellular Component: extracellular space (GO:0005615);; Cellular Component: nucleus (GO:0005634);; Cellular Component: Golgi lumen (GO:0005796);; Cellular Component: integral component of plasma membrane (GO:0005887);; Biological Process: glycosaminoglycan biosyntheti…	K08112|0|pps:100975429|K08112 glypican 6 | (RefSeq) GPC6; glypican 6	--		[T]	Signal transduction mechanisms	Glypican	Glypican-6 OS=Homo sapiens OX=9606 GN=GPC6 PE=1 SV=1	O	Posttranslational modification, protein turnover, chaperones	glypican-6 precursor [Homo sapiens]
13	18450000	63050000	loss	ENSG00000242715	--	--	--	--	--	--	--	--	Domain of unknown function (DUF4600)	Coiled-coil domain-containing protein 169 OS=Homo sapiens OX=9606 GN=CCDC169 PE=2 SV=4	S	Function unknown	coiled-coil domain-containing protein 169 isoform e [Homo sapiens]
13	18450000	63050000	loss	ENSG00000133105	[K]	Transcription	Biological Process: oocyte maturation (GO:0001556);; Cellular Component: plasma membrane (GO:0005886);; Biological Process: adenylate cyclase-activating G-protein coupled receptor signaling pathway (GO:0007189);; Biological Process: adenylate cyclase-inhibiting G-protein coupled receptor signaling pathway (GO:0007193);; Biological Process: negative regulation of cell proliferation (GO:0008285);; …	K04307|0|hsa:122042|K04307 relaxin family peptide receptor 2 | (RefSeq) RXFP2, GPR106, GREAT, INSL3R, LGR8, LGR8.1, RXFPR2; relaxin/insulin like family peptide receptor 2	Neuroactive ligand-receptor interaction (ko04080)	ko04080:Neuroactive ligand-receptor interaction	[R]	General function prediction only	Leucine rich repeat;; 7 transmembrane receptor (rhodopsin family);; Leucine rich repeats (6 copies);; Leucine Rich repeats (2 copies);; Leucine-rich repeat;; Low-density lipoprotein receptor domain class A	Relaxin receptor 2 OS=Homo sapiens OX=9606 GN=RXFP2 PE=1 SV=1	S	Function unknown	relaxin receptor 2 isoform 1 [Homo sapiens]
13	63100000	114364328	loss	ENSG00000088387	--	--	--	--	--	--	[T]	Signal transduction mechanisms	Dock homology region 2;; Domain of unknown function (DUF3398);; PH domain;; C2 domain in Dock180 and Zizimin proteins	Dedicator of cytokinesis protein 9 OS=Homo sapiens OX=9606 GN=DOCK9 PE=1 SV=2	S	Function unknown	PREDICTED: dedicator of cytokinesis protein 9 isoform X26 [Homo sapiens]
13	63100000	114364328	loss	ENSG00000134884	--	--	--	K13173|3.26083e-17|tup:102492766|K13173 arginine and glutamate-rich protein 1 | (RefSeq) ARGLU1; arginine and glutamate rich 1	--		--	--	Arginine and glutamate-rich 1	Arginine and glutamate-rich protein 1 OS=Homo sapiens OX=9606 GN=ARGLU1 PE=1 SV=1	S	Function unknown	ARGLU1 isoform 3 [Pan troglodytes]
13	63100000	114364328	loss	ENSG00000152749	--	--	--	--	--	--	[S]	Function unknown	Rhodopsin-like GPCR transmembrane domain;; Lung seven transmembrane receptor	Integral membrane protein GPR180 OS=Homo sapiens OX=9606 GN=GPR180 PE=2 SV=1	S	Function unknown	integral membrane protein GPR180 precursor [Homo sapiens]
13	18450000	63050000	loss	ENSG00000102543	[F]	Nucleotide transport and metabolism	Molecular Function: zinc ion binding (GO:0008270);; Molecular Function: hydrolase activity (GO:0016787);;	--	--	--	[F]	Nucleotide transport and metabolism	Cytidine and deoxycytidylate deaminase zinc-binding region;; MafB19-like deaminase	Cytidine and dCMP deaminase domain-containing protein 1 OS=Homo sapiens OX=9606 GN=CDADC1 PE=2 SV=1	F	Nucleotide transport and metabolism	cytidine and dCMP deaminase domain-containing protein 1 isoform 1 [Homo sapiens]
13	18450000	63050000	loss	ENSG00000136099	[U]	Intracellular trafficking, secretion, and vesicular transport	--	K16499|0|hsa:5100|K16499 protocadherin delta 2 | (RefSeq) PCDH8, ARCADLIN, PAPC; protocadherin 8	--		[S]	Function unknown	Cadherin domain;; Cadherin-like	Protocadherin-8 OS=Homo sapiens OX=9606 GN=PCDH8 PE=2 SV=2	U	Intracellular trafficking, secretion, and vesicular transport	protocadherin-8 isoform 1 precursor [Homo sapiens]
13	18450000	63050000	loss	ENSG00000187676	--	--	Cellular Component: endoplasmic reticulum membrane (GO:0005789);; Biological Process: fucose metabolic process (GO:0006004);; Cellular Component: integral component of membrane (GO:0016021);; Molecular Function: transferase activity, transferring glycosyl groups (GO:0016757);; Biological Process: protein O-linked fucosylation (GO:0036066);;	K13675|0|hsa:145173|K13675 UDP-glucose:O-linked fucose beta-1,3-glucosyltransferase [EC:2.4.1.-] | (RefSeq) B3GLCT, B3GALTL, B3GTL, B3Glc-T, Gal-T, beta3Glc-T; beta 3-glucosyltransferase	Other types of O-glycan biosynthesis (ko00514)	ko00514:Other types of O-glycan biosynthesis	--	--	Fringe-like;; Galactosyltransferase	Beta-1,3-glucosyltransferase OS=Homo sapiens OX=9606 GN=B3GLCT PE=1 SV=2	O	Posttranslational modification, protein turnover, chaperones	PREDICTED: beta-1,3-glucosyltransferase isoform X2 [Pan troglodytes]
13	18450000	63050000	loss	ENSG00000122034	[R]	General function prediction only	--	K09191|0|ptr:467243|K09191 general transcription factor IIIA | (RefSeq) GTF3A; general transcription factor IIIA	--		[R]	General function prediction only	Zinc finger, C2H2 type	Transcription factor IIIA OS=Homo sapiens OX=9606 GN=GTF3A PE=1 SV=3	S	Function unknown	general transcription factor IIIA, isoform CRA_a, partial [Homo sapiens]
13	18450000	63050000	loss	ENSG00000102753	--	--	Cellular Component: nuclear pore (GO:0005643);; Cellular Component: nucleoplasm (GO:0005654);; Cellular Component: cytosol (GO:0005829);; Biological Process: protein complex assembly (GO:0006461);; Biological Process: NLS-bearing protein import into nucleus (GO:0006607);; Molecular Function: protein C-terminus binding (GO:0008022);; Molecular Function: nuclear localization sequence binding (GO:00…	--	--	--	[U]	Intracellular trafficking, secretion, and vesicular transport	Armadillo/beta-catenin-like repeat;; HEAT-like repeat;; Atypical Arm repeat;; Importin beta binding domain;; HEAT repeats;; HEAT repeat;; Armadillo-like	Importin subunit alpha-4 OS=Homo sapiens OX=9606 GN=KPNA3 PE=1 SV=2	U	Intracellular trafficking, secretion, and vesicular transport	importin subunit alpha-4 [Homo sapiens]
13	18450000	63050000	loss	ENSG00000102539	--	--	Cellular Component: integral component of plasma membrane (GO:0005887);; Biological Process: G-protein coupled receptor signaling pathway (GO:0007186);; Biological Process: digestion (GO:0007586);; Molecular Function: growth hormone-releasing hormone receptor activity (GO:0016520);;	K05266|0|hsa:2862|K05266 motilin receptor | (RefSeq) MLNR, GPR38, MTLR1; motilin receptor	Neuroactive ligand-receptor interaction (ko04080)	ko04080:Neuroactive ligand-receptor interaction	[R]	General function prediction only	7 transmembrane receptor (rhodopsin family);; Serpentine type 7TM GPCR chemoreceptor Srsx;; Serpentine type 7TM GPCR chemoreceptor Srw	Motilin receptor OS=Homo sapiens OX=9606 GN=MLNR PE=2 SV=1	U	Intracellular trafficking, secretion, and vesicular transport	motilin receptor [Homo sapiens]
13	63100000	114364328	loss	ENSG00000125246	[G]	Carbohydrate transport and metabolism	Molecular Function: magnesium ion binding (GO:0000287);; Molecular Function: malate synthase activity (GO:0004474);; Cellular Component: mitochondrion (GO:0005739);; Cellular Component: integral component of membrane (GO:0016021);; Molecular Function: lyase activity (GO:0016829);;	K11390|0|hsa:171425|K11390 citrate lyase subunit beta-like protein [EC:4.1.-.-] | (RefSeq) CLYBL, CLB; citrate lyase beta like	--		--	--	HpcH/HpaI aldolase/citrate lyase family;; C-C_Bond_Lyase of the TIM-Barrel fold	Citramalyl-CoA lyase, mitochondrial OS=Homo sapiens OX=9606 GN=CLYBL PE=1 SV=2	G	Carbohydrate transport and metabolism	citramalyl-CoA lyase, mitochondrial precursor [Homo sapiens]
13	18450000	63050000	loss	ENSG00000188342	--	--	Biological Process: mRNA splicing, via spliceosome (GO:0000398);; Molecular Function: transcription factor activity, core RNA polymerase II binding (GO:0000991);; Molecular Function: DNA binding (GO:0003677);; Molecular Function: translation initiation factor activity (GO:0003743);; Molecular Function: helicase activity (GO:0004386);; Molecular Function: protein binding (GO:0005515);; Molecular F…	K03139|3.94818e-176|ptr:741868|K03139 transcription initiation factor TFIIF subunit beta [EC:3.6.4.12] | (RefSeq) GTF2F2; general transcription factor IIF subunit 2	Basal transcription factors (ko03022)	ko03022:Basal transcription factors	[K]	Transcription	Transcription initiation factor IIF, beta subunit	General transcription factor IIF subunit 2 OS=Homo sapiens OX=9606 GN=GTF2F2 PE=1 SV=2	K	Transcription	PREDICTED: general transcription factor IIF subunit 2 isoform X2 [Chlorocebus sabaeus]
13	63100000	114364328	loss	ENSG00000136160	--	--	--	K04198|0|pps:100986370|K04198 endothelin receptor type B | (RefSeq) EDNRB; endothelin receptor type B	cGMP-PKG signaling pathway (ko04022);; Melanogenesis (ko04916);; Neuroactive ligand-receptor interaction (ko04080);; Pathways in cancer (ko05200);; Calcium signaling pathway (ko04020)	ko05200:Pathways in cancer;ko04022:cGMP-PKG signaling pathway;ko04020:Calcium signaling pathway;ko04916:Melanogenesis;ko04080:Neuroactive ligand-receptor interaction	[R]	General function prediction only	7 transmembrane receptor (rhodopsin family);; Serpentine type 7TM GPCR chemoreceptor Srsx;; Serpentine type 7TM GPCR chemoreceptor Srx	Endothelin receptor type B OS=Homo sapiens OX=9606 GN=EDNRB PE=1 SV=1	U	Intracellular trafficking, secretion, and vesicular transport	endothelin receptor type B isoform 3 [Homo sapiens]
13	18450000	63050000	loss	ENSG00000186184	--	--	Molecular Function: RNA polymerase II regulatory region sequence-specific DNA binding (GO:0000977);; Molecular Function: transcription factor activity, sequence-specific DNA binding (GO:0003700);; Cellular Component: intracellular (GO:0005622);; Biological Process: regulation of transcription, DNA-templated (GO:0006355);; Cellular Component: integral component of membrane (GO:0016021);;	--	--	--	--	--	--	Protein GVQW1 OS=Homo sapiens OX=9606 GN=GVQW1 PE=2 SV=1	--	--	hypothetical protein EGM_12342, partial [Macaca fascicularis]
13	18450000	63050000	loss	ENSG00000102445	--	--	--	--	--	--	[T]	Signal transduction mechanisms	Putative zinc-RING and/or ribbon	Protein RUBCNL-like OS=Homo sapiens OX=9606 GN=RUBCNL PE=1 SV=3	S	Function unknown	protein RUBCNL-like isoform a [Homo sapiens]
13	63100000	114364328	loss	ENSG00000134873	--	--	Molecular Function: structural molecule activity (GO:0005198);; Cellular Component: cytoplasm (GO:0005737);; Cellular Component: plasma membrane (GO:0005886);; Cellular Component: bicellular tight junction (GO:0005923);; Biological Process: ion transport (GO:0006811);; Cellular Component: integral component of membrane (GO:0016021);; Biological Process: calcium-independent cell-cell adhesion via …	K06087|1.17686e-147|bacu:103006570|K06087 claudin | (RefSeq) CLDN10; claudin 10	Cell adhesion molecules (CAMs) (ko04514);; Tight junction (ko04530);; Hepatitis C (ko05160);; Leukocyte transendothelial migration (ko04670)	ko05160:Hepatitis C;ko04670:Leukocyte transendothelial migration;ko04514:Cell adhesion molecules (CAMs);ko04530:Tight junction	--	--	PMP-22/EMP/MP20/Claudin family	Claudin-10 OS=Homo sapiens OX=9606 GN=CLDN10 PE=1 SV=2	U	Intracellular trafficking, secretion, and vesicular transport	hCG2039317, partial [Homo sapiens]
13	18450000	63050000	loss	ENSG00000139668	[T]	Signal transduction mechanisms	--	--	--	--	[S]	Function unknown	WD domain, G-beta repeat;; FYVE zinc finger;; Anaphase-promoting complex subunit 4 WD40 domain	WD repeat and FYVE domain-containing protein 2 OS=Homo sapiens OX=9606 GN=WDFY2 PE=1 SV=2	S	Function unknown	PREDICTED: WD repeat and FYVE domain-containing protein 2 isoform X2 [Macaca fascicularis]
13	18450000	63050000	loss	ENSG00000139508	--	--	--	K20840|0|hsa:283537|K20840 MFS transporter, PCFT/HCP family, solute carrier family 46, member 3 | (RefSeq) SLC46A3, FKSG16; solute carrier family 46 member 3	--		[R]	General function prediction only	Major Facilitator Superfamily	Solute carrier family 46 member 3 OS=Homo sapiens OX=9606 GN=SLC46A3 PE=2 SV=1	G	Carbohydrate transport and metabolism	solute carrier family 46 member 3 isoform a precursor [Homo sapiens]
13	63100000	114364328	loss	ENSG00000165300	[K]	Transcription	--	--	--	--	--	--	Leucine rich repeat;; Leucine Rich repeats (2 copies);; Leucine rich repeats (6 copies)	SLIT and NTRK-like protein 5 OS=Homo sapiens OX=9606 GN=SLITRK5 PE=2 SV=2	S	Function unknown	SLIT and NTRK-like family, member 5 [Homo sapiens]
13	63100000	114364328	loss	ENSG00000134900	[O]	Posttranslational modification, protein turnover, chaperones	Biological Process: protein polyubiquitination (GO:0000209);; Molecular Function: aminopeptidase activity (GO:0004177);; Molecular Function: serine-type endopeptidase activity (GO:0004252);; Molecular Function: protein binding (GO:0005515);; Cellular Component: nucleus (GO:0005634);; Cellular Component: cytosol (GO:0005829);; Biological Process: proteolysis (GO:0006508);; Molecular Function: trip…	K01280|0|mcf:101865014|K01280 tripeptidyl-peptidase II [EC:3.4.14.10] | (RefSeq) TPP2; tripeptidyl peptidase 2	--		[O]	Posttranslational modification, protein turnover, chaperones	Subtilase family;; Tripeptidyl peptidase II	Tripeptidyl-peptidase 2 OS=Homo sapiens OX=9606 GN=TPP2 PE=1 SV=4	O	Posttranslational modification, protein turnover, chaperones	tripeptidyl-peptidase 2 isoform 2 [Homo sapiens]
13	18450000	63050000	loss	ENSG00000183722	--	--	Molecular Function: DNA binding (GO:0003677);; Cellular Component: integral component of membrane (GO:0016021);;	--	--	--	[S]	Function unknown	Lipoma HMGIC fusion partner-like protein;; Uncharacterized protein family UPF0016	LHFPL tetraspan subfamily member 6 protein OS=Homo sapiens OX=9606 GN=LHFPL6 PE=2 SV=1	U	Intracellular trafficking, secretion, and vesicular transport	LHFPL tetraspan subfamily member 6 protein precursor [Homo sapiens]
13	18450000	63050000	loss	ENSG00000120669	--	--	Molecular Function: RNA polymerase II regulatory region sequence-specific DNA binding (GO:0000977);; Molecular Function: core promoter sequence-specific DNA binding (GO:0001046);; Molecular Function: transcriptional activator activity, RNA polymerase II transcription regulatory region sequence-specific binding (GO:0001228);; Biological Process: primary ovarian follicle growth (GO:0001545);; Cellu…	--	--	--	--	--	Helix-loop-helix DNA-binding domain	Spermatogenesis- and oogenesis-specific basic helix-loop-helix-containing protein 2 OS=Homo sapiens OX=9606 GN=SOHLH2 PE=2 SV=2	K	Transcription	spermatogenesis- and oogenesis-specific basic helix-loop-helix-containing protein 2 isoform 1 [Homo sapiens]
13	18450000	63050000	loss	ENSG00000102837	--	--	Molecular Function: catalytic activity (GO:0003824);; Cellular Component: extracellular space (GO:0005615);; Cellular Component: mitochondrion (GO:0005739);; Cellular Component: plasma membrane (GO:0005886);; Biological Process: regulation of necrotic cell death (GO:0010939);; Cellular Component: specific granule (GO:0042581);; Cellular Component: azurophil granule (GO:0042582);; Molecular Functi…	--	--	--	--	--	Olfactomedin-like domain	Olfactomedin-4 OS=Homo sapiens OX=9606 GN=OLFM4 PE=1 SV=1	U	Intracellular trafficking, secretion, and vesicular transport	PREDICTED: olfactomedin-4 [Pan paniscus]
13	18450000	63050000	loss	ENSG00000180138	[T]	Signal transduction mechanisms	Cellular Component: condensed chromosome kinetochore (GO:0000777);; Molecular Function: protein serine/threonine kinase activity (GO:0004674);; Molecular Function: protein binding (GO:0005515);; Molecular Function: ATP binding (GO:0005524);; Cellular Component: centrosome (GO:0005813);; Cellular Component: cytosol (GO:0005829);; Cellular Component: mRNA cleavage and polyadenylation specificity fa…	K08957|0|hsa:122011|K08957 casein kinase 1, alpha [EC:2.7.11.1] | (RefSeq) CSNK1A1L, CK1; casein kinase 1 alpha 1 like	Hedgehog signaling pathway (ko04340);; Wnt signaling pathway (ko04310)	ko04340:Hedgehog signaling pathway;ko04310:Wnt signaling pathway	[T]	Signal transduction mechanisms	Protein kinase domain;; Protein tyrosine kinase	Casein kinase I isoform alpha-like OS=Homo sapiens OX=9606 GN=CSNK1A1L PE=2 SV=2	T	Signal transduction mechanisms	casein kinase I isoform alpha-like [Homo sapiens]
13	63100000	114364328	loss	ENSG00000276644	--	--	Biological Process: negative regulation of transcription from RNA polymerase II promoter (GO:0000122);; Molecular Function: transcription factor activity, RNA polymerase II core promoter sequence-specific binding involved in preinitiation complex assembly (GO:0001075);; Molecular Function: transcriptional repressor activity, RNA polymerase II core promoter proximal region sequence-specific bindin…	--	--	--	[K]	Transcription	SKI/SNO/DAC family	Dachshund homolog 1 OS=Homo sapiens OX=9606 GN=DACH1 PE=1 SV=3	S	Function unknown	dachshund homolog 1 isoform a [Homo sapiens]
13	63100000	114364328	loss	ENSG00000125285	--	--	Biological Process: negative regulation of transcription from RNA polymerase II promoter (GO:0000122);; Molecular Function: RNA polymerase II transcription factor activity, sequence-specific DNA binding (GO:0000981);; Biological Process: hair follicle development (GO:0001942);; Molecular Function: chromatin binding (GO:0003682);; Biological Process: visual perception (GO:0007601);; Biological Pro…	K09267|1.22945e-91|ssc:100517115|K09267 transcription factor SOX1/3/14/21 (SOX group B) | (RefSeq) SOX21; SRY-box 21	--		[K]	Transcription	HMG (high mobility group) box;; HMG-box domain;; SOX transcription factor	Transcription factor SOX-21 OS=Homo sapiens OX=9606 GN=SOX21 PE=2 SV=1	B	Chromatin structure and dynamics	transcription factor SOX-21 isoform X1 [Piliocolobus tephrosceles]
13	18450000	63050000	loss	ENSG00000132963	--	--	Cellular Component: proteasome complex (GO:0000502);; Molecular Function: protein binding (GO:0005515);; Cellular Component: nucleoplasm (GO:0005654);; Cellular Component: endoplasmic reticulum (GO:0005783);; Cellular Component: cytosol (GO:0005829);; Cellular Component: organelle membrane (GO:0031090);; Biological Process: proteasome assembly (GO:0043248);;	K11599|1.7192e-80|pps:100976592|K11599 proteasome maturation protein | (RefSeq) POMP; proteasome maturation protein	Proteasome (ko03050)	ko03050:Proteasome	[O]	Posttranslational modification, protein turnover, chaperones	Proteasome maturation factor UMP1	Proteasome maturation protein OS=Homo sapiens OX=9606 GN=POMP PE=1 SV=1	O	Posttranslational modification, protein turnover, chaperones	proteasome maturation protein [Homo sapiens]
13	63100000	114364328	loss	ENSG00000125266	--	--	Molecular Function: virus receptor activity (GO:0001618);; Biological Process: lymph vessel development (GO:0001945);; Biological Process: cell migration involved in sprouting angiogenesis (GO:0002042);; Cellular Component: integral component of plasma membrane (GO:0005887);; Cellular Component: focal adhesion (GO:0005925);; Biological Process: cell-cell signaling (GO:0007267);; Biological Proces…	K05463|0|ptr:735430|K05463 ephrin-B | (RefSeq) EFNB2; ephrin B2	Axon guidance (ko04360)	ko04360:Axon guidance	[T]	Signal transduction mechanisms	Ephrin	Ephrin-B2 OS=Homo sapiens OX=9606 GN=EFNB2 PE=1 SV=1	S	Function unknown	ephrin-B2 precursor [Homo sapiens]
13	63100000	114364328	loss	ENSG00000088386	[E]	Amino acid transport and metabolism	--	K14206|0|hsa:6564|K14206 solute carrier family 15 (oligopeptide transporter), member 1 | (RefSeq) SLC15A1, HPECT1, HPEPT1, PEPT1; solute carrier family 15 member 1	Protein digestion and absorption (ko04974)	ko04974:Protein digestion and absorption	[E]	Amino acid transport and metabolism	POT family	Solute carrier family 15 member 1 OS=Homo sapiens OX=9606 GN=SLC15A1 PE=2 SV=1	E	Amino acid transport and metabolism	solute carrier family 15 member 1 [Homo sapiens]
13	18450000	63050000	loss	ENSG00000136144	[DZ]	Cell cycle control, cell division, chromosome partitioning ;; Cytoskeleton	--	K11494|0|bacu:103013970|K11494 RCC1 and BTB domain-containing protein | (RefSeq) RCBTB1; RCC1 and BTB domain containing protein 1	--		[S]	Function unknown	Regulator of chromosome condensation (RCC1) repeat;; Regulator of chromosome condensation (RCC1) repeat;; BTB/POZ domain;; BTB And C-terminal Kelch	RCC1 and BTB domain-containing protein 1 OS=Homo sapiens OX=9606 GN=RCBTB1 PE=1 SV=1	DZ	--	RCC1 and BTB domain-containing protein 1 isoform a [Homo sapiens]
13	63100000	114364328	loss	ENSG00000083520	[K]	Transcription	--	K12585|0|hsa:22894|K12585 exosome complex exonuclease DIS3/RRP44 [EC:3.1.13.-] | (RefSeq) DIS3, 2810028N01Rik, EXOSC11, KIAA1008, RRP44, dis3p; DIS3 homolog, exosome endoribonuclease and 3'-5' exoribonuclease	RNA degradation (ko03018)	ko03018:RNA degradation	[J]	Translation, ribosomal structure and biogenesis	RNB domain;; PIN domain;; Rrp44-like cold shock domain;; S1 domain	Exosome complex exonuclease RRP44 OS=Homo sapiens OX=9606 GN=DIS3 PE=1 SV=2	K	Transcription	exosome complex exonuclease RRP44 isoform a [Homo sapiens]
13	18450000	63050000	loss	ENSG00000132932	[P]	Inorganic ion transport and metabolism	Cellular Component: Golgi membrane (GO:0000139);; Molecular Function: magnesium ion binding (GO:0000287);; Cellular Component: photoreceptor outer segment (GO:0001750);; Biological Process: involuntary skeletal muscle contraction (GO:0003011);; Molecular Function: phospholipid-translocating ATPase activity (GO:0004012);; Molecular Function: ATP binding (GO:0005524);; Cellular Component: endosome …	K14802|0|mcc:709311|K14802 phospholipid-transporting ATPase [EC:3.6.3.1] | (RefSeq) ATP8A2; ATPase phospholipid transporting 8A2	--		[R]	General function prediction only	Phospholipid-translocating P-type ATPase C-terminal;; Phospholipid-translocating ATPase N-terminal;; Cation transport ATPase (P-type);; E1-E2 ATPase;; haloacid dehalogenase-like hydrolase	Phospholipid-transporting ATPase IB OS=Homo sapiens OX=9606 GN=ATP8A2 PE=1 SV=2	U	Intracellular trafficking, secretion, and vesicular transport	phospholipid-transporting ATPase IB isoform 1 [Homo sapiens]
13	18450000	63050000	loss	ENSG00000132975	--	--	Molecular Function: G-protein coupled receptor activity (GO:0004930);; Cellular Component: integral component of plasma membrane (GO:0005887);; Biological Process: cellular calcium ion homeostasis (GO:0006874);; Biological Process: G-protein coupled receptor signaling pathway (GO:0007186);; Molecular Function: phosphatidylcholine binding (GO:0031210);;	K04315|0|ptr:467240|K04315 G protein-coupled receptor 12 | (RefSeq) GPR12; G protein-coupled receptor 12	--		[R]	General function prediction only	7 transmembrane receptor (rhodopsin family);; Serpentine type 7TM GPCR chemoreceptor Srsx	G-protein coupled receptor 12 OS=Homo sapiens OX=9606 GN=GPR12 PE=1 SV=1	U	Intracellular trafficking, secretion, and vesicular transport	G-protein coupled receptor 12 [Homo sapiens]
13	18450000	63050000	loss	ENSG00000122026	[J]	Translation, ribosomal structure and biogenesis	--	K02889|2.72927e-112|ssc:100736809|K02889 large subunit ribosomal protein L21e | (RefSeq) RPL21; ribosomal protein L21	Ribosome (ko03010)	ko03010:Ribosome	[J]	Translation, ribosomal structure and biogenesis	Ribosomal protein L21e	60S ribosomal protein L21 OS=Homo sapiens OX=9606 GN=RPL21 PE=1 SV=2	J	Translation, ribosomal structure and biogenesis	60S ribosomal protein L21 [Homo sapiens]
13	18450000	63050000	loss	ENSG00000281106	--	--	--	--	--	--	--	--	--	Transmembrane protein 272 OS=Homo sapiens OX=9606 GN=TMEM272 PE=2 SV=2	S	Function unknown	hCG2020493, partial [Homo sapiens]
13	18450000	63050000	loss	ENSG00000165837	--	--	--	--	--	--	--	--	FAM194 protein	Glutamate-rich protein 6B OS=Homo sapiens OX=9606 GN=ERICH6B PE=2 SV=1	S	Function unknown	unnamed protein product [Homo sapiens]
13	18450000	63050000	loss	ENSG00000102781	[O]	Posttranslational modification, protein turnover, chaperones	Molecular Function: ATP binding (GO:0005524);; Cellular Component: nucleus (GO:0005634);; Cellular Component: cytoplasm (GO:0005737);; Cellular Component: microtubule (GO:0005874);; Biological Process: spermatogenesis (GO:0007283);; Molecular Function: microtubule binding (GO:0008017);; Molecular Function: microtubule-severing ATPase activity (GO:0008568);; Biological Process: cytoplasmic microtu…	K07767|0|hsa:84056|K07767 katanin p60 ATPase-containing subunit A1 [EC:3.6.4.3] | (RefSeq) KATNAL1; katanin catalytic subunit A1 like 1	--		[O]	Posttranslational modification, protein turnover, chaperones	ATPase family associated with various cellular activities (AAA);; Vps4 C terminal oligomerisation domain;; AAA domain (Cdc48 subfamily);; Holliday junction DNA helicase ruvB N-terminus;; AAA domain (dynein-related subfamily)	Katanin p60 ATPase-containing subunit A-like 1 OS=Homo sapiens OX=9606 GN=KATNAL1 PE=1 SV=1	O	Posttranslational modification, protein turnover, chaperones	katanin p60 ATPase-containing subunit A-like 1 [Homo sapiens]
13	63100000	114364328	loss	ENSG00000139737	--	--	--	K16580|0|ngi:103746816|K16580 SLAIN motif-containing protein 1/2 | (RefSeq) Slain1; SLAIN motif family member 1	--		--	--	SLAIN motif-containing family	SLAIN motif-containing protein 1 OS=Homo sapiens OX=9606 GN=SLAIN1 PE=1 SV=3	S	Function unknown	SLAIN motif-containing protein 1 isoform C [Homo sapiens]
13	63100000	114364328	loss	ENSG00000125304	--	--	Cellular Component: integral component of plasma membrane (GO:0005887);; Biological Process: transport (GO:0006810);; Cellular Component: endosome membrane (GO:0010008);; Cellular Component: extracellular exosome (GO:0070062);;	K17086|0|ggo:101153802|K17086 transmembrane 9 superfamily member 2/4 | (RefSeq) TM9SF2; transmembrane 9 superfamily member 2	--		[U]	Intracellular trafficking, secretion, and vesicular transport	Endomembrane protein 70	Transmembrane 9 superfamily member 2 OS=Homo sapiens OX=9606 GN=TM9SF2 PE=1 SV=1	S	Function unknown	PREDICTED: transmembrane 9 superfamily member 2 [Gorilla gorilla gorilla]
13	18450000	63050000	loss	ENSG00000136141	[K]	Transcription	--	--	--	--	[Z]	Cytoskeleton	Leucine rich repeat;; Leucine Rich repeats (2 copies);; Calponin homology (CH) domain;; Leucine Rich Repeat	Leucine-rich repeat and calponin homology domain-containing protein 1 OS=Homo sapiens OX=9606 GN=LRCH1 PE=1 SV=3	S	Function unknown	hypothetical protein, partial [Pongo abelii]
13	63100000	114364328	loss	ENSG00000102572	[T]	Signal transduction mechanisms	Biological Process: mitotic cell cycle (GO:0000278);; Molecular Function: signal transducer, downstream of receptor, with serine/threonine kinase activity (GO:0004702);; Molecular Function: protein binding (GO:0005515);; Molecular Function: ATP binding (GO:0005524);; Cellular Component: nucleoplasm (GO:0005654);; Cellular Component: nucleolus (GO:0005730);; Cellular Component: cytosol (GO:0005829…	K08838|0|ptr:452633|K08838 serine/threonine-protein kinase 24/25/MST4 [EC:2.7.11.1] | (RefSeq) STK24; serine/threonine kinase 24	--		[T]	Signal transduction mechanisms	Protein kinase domain;; Protein tyrosine kinase	Serine/threonine-protein kinase 24 OS=Homo sapiens OX=9606 GN=STK24 PE=1 SV=1	T	Signal transduction mechanisms	serine/threonine-protein kinase 24 isoform X1 [Microcebus murinus]
13	18450000	63050000	loss	ENSG00000253797	[M]	Cell wall/membrane/envelope biogenesis	Molecular Function: protein binding (GO:0005515);; Cellular Component: nucleoplasm (GO:0005654);; Cellular Component: nucleolus (GO:0005730);; Biological Process: multicellular organism development (GO:0007275);; Biological Process: spermatogenesis (GO:0007283);; Cellular Component: viral nucleocapsid (GO:0019013);; Biological Process: cell differentiation (GO:0030154);; Biological Process: matur…	K14567|0|hsa:9724|K14567 U3 small nucleolar RNA-associated protein 14 | (RefSeq) UTP14C, 2700066J21Rik, KIAA0266, UTP14B; UTP14, small subunit processome component homolog C (S. cerevisiae)	Ribosome biogenesis in eukaryotes (ko03008)	ko03008:Ribosome biogenesis in eukaryotes	[S]	Function unknown	Utp14 protein;; Glycosyl transferases group 1;; Glycosyl transferases group 1	U3 small nucleolar RNA-associated protein 14 homolog C OS=Homo sapiens OX=9606 GN=UTP14C PE=1 SV=1	S	Function unknown	U3 small nucleolar RNA-associated protein 14 homolog C [Homo sapiens]
13	18450000	63050000	loss	ENSG00000133119	[L]	Replication, recombination and repair	Biological Process: telomere maintenance via recombination (GO:0000722);; Molecular Function: DNA clamp loader activity (GO:0003689);; Molecular Function: protein binding (GO:0005515);; Cellular Component: nucleoplasm (GO:0005654);; Cellular Component: DNA replication factor C complex (GO:0005663);; Biological Process: DNA strand elongation involved in DNA replication (GO:0006271);; Biological Pr…	K10756|0|ptg:102967482|K10756 replication factor C subunit 3/5 | (RefSeq) RFC3; replication factor C subunit 3	Nucleotide excision repair (ko03420);; Mismatch repair (ko03430);; DNA replication (ko03030)	ko03420:Nucleotide excision repair;ko03430:Mismatch repair;ko03030:DNA replication	[DL]	--	DNA polymerase III, delta subunit;; ATPase family associated with various cellular activities (AAA);; Rad17 cell cycle checkpoint protein	Replication factor C subunit 3 OS=Homo sapiens OX=9606 GN=RFC3 PE=1 SV=2	L	Replication, recombination and repair	replication factor C subunit 3 isoform 1 [Homo sapiens]
13	18450000	63050000	loss	ENSG00000120685	--	--	--	--	--	--	--	--	Domain of unknown function (DUF4476)	Proline and serine-rich protein 1 OS=Homo sapiens OX=9606 GN=PROSER1 PE=1 SV=2	O	Posttranslational modification, protein turnover, chaperones	proline and serine-rich protein 1 [Homo sapiens]
13	63100000	114364328	loss	ENSG00000165621	--	--	--	K08419|0|hsa:27199|K08419 oxoglutarate (alpha-ketoglutarate) receptor 1 | (RefSeq) OXGR1, GPR80, GPR99, P2RY15, P2Y15, aKGR; oxoglutarate receptor 1	--		--	--	7 transmembrane receptor (rhodopsin family)	2-oxoglutarate receptor 1 OS=Homo sapiens OX=9606 GN=OXGR1 PE=2 SV=1	U	Intracellular trafficking, secretion, and vesicular transport	2-oxoglutarate receptor 1 [Homo sapiens]
13	18450000	63050000	loss	ENSG00000179813	--	--	--	--	--	--	--	--	FAM216B protein family	Protein FAM216B OS=Homo sapiens OX=9606 GN=FAM216B PE=2 SV=1	O	Posttranslational modification, protein turnover, chaperones	PREDICTED: protein FAM216B [Pan paniscus]
13	18450000	63050000	loss	ENSG00000189167	--	--	Cellular Component: cytoplasm (GO:0005737);;	K18762|0|hsa:646799|K18762 zygote arrest protein 1 | (RefSeq) ZAR1L, Z3CXXC7, ZAR2; zygote arrest 1-like	--		--	--	Zinc-binding domain	ZAR1-like protein OS=Homo sapiens OX=9606 GN=ZAR1L PE=2 SV=2	S	Function unknown	ZAR1-like protein [Homo sapiens]
13	63100000	114364328	loss	ENSG00000185352	--	--	Biological Process: heparan sulfate proteoglycan biosynthetic process, enzymatic modification (GO:0015015);; Cellular Component: integral component of membrane (GO:0016021);; Molecular Function: heparan sulfate 6-O-sulfotransferase activity (GO:0017095);;	K08103|0|hsa:266722|K08103 heparan sulfate 6-O-sulfotransferase HS6ST3 [EC:2.8.2.-] | (RefSeq) HS6ST3, HS6ST-3; heparan sulfate 6-O-sulfotransferase 3	Glycosaminoglycan biosynthesis - heparan sulfate / heparin (ko00534)	ko00534:Glycosaminoglycan biosynthesis - heparan sulfate / heparin	[MG]	--	Sulfotransferase family	Heparan-sulfate 6-O-sulfotransferase 3 OS=Homo sapiens OX=9606 GN=HS6ST3 PE=2 SV=3	S	Function unknown	hypothetical protein, partial [Homo sapiens]
13	63100000	114364328	loss	ENSG00000136111	--	--	--	K17902|0|pps:100987740|K17902 TBC1 domain family member 4 | (RefSeq) TBC1D4; TBC1 domain family member 4	Insulin resistance (ko04931);; Thyroid hormone signaling pathway (ko04919)	ko04919:Thyroid hormone signaling pathway;ko04931:Insulin resistance	[R]	General function prediction only	Rab-GTPase-TBC domain;; Domain of unknown function (DUF3350);; Phosphotyrosine interaction domain (PTB/PID)	TBC1 domain family member 4 OS=Homo sapiens OX=9606 GN=TBC1D4 PE=1 SV=2	S	Function unknown	TBC1 domain family member 4 isoform 3 [Homo sapiens]
13	18450000	63050000	loss	ENSG00000280165	[S]	Function unknown	Molecular Function: calcium ion binding (GO:0005509);; Cellular Component: plasma membrane (GO:0005886);; Biological Process: homophilic cell adhesion via plasma membrane adhesion molecules (GO:0007156);; Cellular Component: integral component of membrane (GO:0016021);; Molecular Function: RNA binding (GO:0044822);;	K16498|0|hsa:64881|K16498 protocadherin delta 1 | (RefSeq) PCDH20, PCDH13; protocadherin 20	--		--	--	Cadherin domain;; Cadherin-like	Protocadherin-20 OS=Homo sapiens OX=9606 GN=PCDH20 PE=2 SV=2	U	Intracellular trafficking, secretion, and vesicular transport	protocadherin-20 precursor [Homo sapiens]
13	18450000	63050000	loss	ENSG00000120699	[J]	Translation, ribosomal structure and biogenesis	Cellular Component: nuclear exosome (RNase complex) (GO:0000176);; Cellular Component: cytoplasmic exosome (RNase complex) (GO:0000177);; Biological Process: exonucleolytic trimming to generate mature 3'-end of 5.8S rRNA from tricistronic rRNA transcript (SSU-rRNA, 5.8S rRNA, LSU-rRNA) (GO:0000467);; Molecular Function: exoribonuclease activity (GO:0004532);; Molecular Function: protein binding (…	K12586|0|hsa:11340|K12586 exosome complex component RRP43 | (RefSeq) EXOSC8, CIP3, EAP2, OIP2, PCH1C, RRP43, Rrp43p, bA421P11.3, p9; exosome component 8	RNA degradation (ko03018)	ko03018:RNA degradation	[J]	Translation, ribosomal structure and biogenesis	3' exoribonuclease family, domain 1;; 3' exoribonuclease family, domain 2	Exosome complex component RRP43 OS=Homo sapiens OX=9606 GN=EXOSC8 PE=1 SV=1	J	Translation, ribosomal structure and biogenesis	exosome complex component RRP43 [Homo sapiens]
13	63100000	114364328	loss	ENSG00000178235	--	--	Biological Process: axonogenesis (GO:0007409);; Cellular Component: integral component of membrane (GO:0016021);; Biological Process: adult behavior (GO:0030534);; Biological Process: multicellular organism growth (GO:0035264);; Biological Process: homeostatic process (GO:0042592);; Biological Process: positive regulation of synapse assembly (GO:0051965);;	--	--	--	--	--	Leucine rich repeat;; Leucine rich repeats (6 copies);; Leucine Rich repeats (2 copies);; Leucine Rich Repeat	SLIT and NTRK-like protein 1 OS=Homo sapiens OX=9606 GN=SLITRK1 PE=1 SV=2	S	Function unknown	SLIT and NTRK-like protein 1 precursor [Homo sapiens]
13	18450000	63050000	loss	ENSG00000244754	[J]	Translation, ribosomal structure and biogenesis	Biological Process: negative regulation of transcription from RNA polymerase II promoter (GO:0000122);; Molecular Function: RNA polymerase II transcription corepressor activity (GO:0001106);; Biological Process: blastocyst development (GO:0001824);; Cellular Component: nucleus (GO:0005634);; Cellular Component: transcriptional repressor complex (GO:0017053);; Molecular Function: enzyme binding (G…	--	--	--	[L]	Replication, recombination and repair	AAA domain	NEDD4-binding protein 2-like 2 OS=Homo sapiens OX=9606 GN=N4BP2L2 PE=1 SV=1	S	Function unknown	NEDD4-binding protein 2-like 2 isoform 2 [Homo sapiens]
13	63100000	114364328	loss	ENSG00000188243	--	--	Cellular Component: nucleus (GO:0005634);; Cellular Component: cytoplasm (GO:0005737);; Biological Process: negative regulation of NF-kappaB transcription factor activity (GO:0032088);; Molecular Function: NF-kappaB binding (GO:0051059);;	--	--	--	--	--	COMM domain	COMM domain-containing protein 6 OS=Homo sapiens OX=9606 GN=COMMD6 PE=1 SV=1	S	Function unknown	PREDICTED: COMM domain-containing protein 6 isoform X1 [Pan paniscus]
13	18450000	63050000	loss	ENSG00000250709	--	--	Molecular Function: RNA polymerase II regulatory region sequence-specific DNA binding (GO:0000977);; Molecular Function: core promoter sequence-specific DNA binding (GO:0001046);; Molecular Function: transcriptional activator activity, RNA polymerase II transcription regulatory region sequence-specific binding (GO:0001228);; Biological Process: primary ovarian follicle growth (GO:0001545);; Cellu…	--	--	--	--	--	Domain of unknown function (DUF4600);; Helix-loop-helix DNA-binding domain	Spermatogenesis- and oogenesis-specific basic helix-loop-helix-containing protein 2 OS=Homo sapiens OX=9606 GN=SOHLH2 PE=2 SV=2	K	Transcription	CCDC169-SOHLH2 protein [Homo sapiens]
13	18450000	63050000	loss	ENSG00000180660	--	--	Molecular Function: protein binding (GO:0005515);; Cellular Component: nucleus (GO:0005634);; Biological Process: nervous system development (GO:0007399);; Biological Process: positive regulation of cell proliferation (GO:0008284);; Biological Process: embryonic body morphogenesis (GO:0010172);; Biological Process: camera-type eye development (GO:0043010);;	--	--	--	[T]	Signal transduction mechanisms	Mab-21 protein	Putative nucleotidyltransferase MAB21L1 OS=Homo sapiens OX=9606 GN=MAB21L1 PE=1 SV=1	O	Posttranslational modification, protein turnover, chaperones	putative nucleotidyltransferase MAB21L1 [Homo sapiens]
13	18450000	63050000	loss	ENSG00000102802	--	--	Cellular Component: cytoplasm (GO:0005737);; Biological Process: positive regulation of fat cell differentiation (GO:0045600);;	--	--	--	--	--	--	Mesenteric estrogen-dependent adipogenesis protein OS=Homo sapiens OX=9606 GN=MEDAG PE=2 SV=1	S	Function unknown	PREDICTED: mesenteric estrogen-dependent adipogenesis protein [Chlorocebus sabaeus]
13	18450000	63050000	loss	ENSG00000136169	--	--	--	K18494|0|hsa:83852|K18494 histone-lysine N-methyltransferase SETDB2 [EC:2.1.1.43] | (RefSeq) SETDB2, C13orf4, CLLD8, CLLL8, KMT1F; SET domain bifurcated 2	Lysine degradation (ko00310)	ko00310:Lysine degradation	[B]	Chromatin structure and dynamics	SET domain;; Pre-SET motif;; Methyl-CpG binding domain	Histone-lysine N-methyltransferase SETDB2 OS=Homo sapiens OX=9606 GN=SETDB2 PE=1 SV=2	S	Function unknown	histone-lysine N-methyltransferase SETDB2 isoform a [Homo sapiens]
13	18450000	63050000	loss	ENSG00000080618	[M]	Cell wall/membrane/envelope biogenesis	--	K01300|0|hsa:1361|K01300 carboxypeptidase B2 [EC:3.4.17.20] | (RefSeq) CPB2, CPU, PCPB, TAFI; carboxypeptidase B2	Protein digestion and absorption (ko04974);; Complement and coagulation cascades (ko04610);; Pancreatic secretion (ko04972)	ko04974:Protein digestion and absorption;ko04972:Pancreatic secretion;ko04610:Complement and coagulation cascades	[S]	Function unknown	Zinc carboxypeptidase;; Carboxypeptidase activation peptide	Carboxypeptidase B2 OS=Homo sapiens OX=9606 GN=CPB2 PE=1 SV=2	E	Amino acid transport and metabolism	carboxypeptidase B2 isoform 1 preproprotein [Homo sapiens]
13	18450000	63050000	loss	ENSG00000120693	--	--	Biological Process: ureteric bud development (GO:0001657);; Molecular Function: DNA binding (GO:0003677);; Molecular Function: transcription factor activity, sequence-specific DNA binding (GO:0003700);; Molecular Function: protein binding (GO:0005515);; Cellular Component: nucleoplasm (GO:0005654);; Cellular Component: transcription factor complex (GO:0005667);; Cellular Component: cytosol (GO:00…	K16791|0|hsa:4093|K16791 mothers against decapentaplegic homolog 9 | (RefSeq) SMAD9, MADH6, MADH9, PPH2, SMAD8, SMAD8/9, SMAD8A, SMAD8B; SMAD family member 9	TGF-beta signaling pathway (ko04350);; Signaling pathways regulating pluripotency of stem cells (ko04550)	ko04350:TGF-beta signaling pathway;ko04550:Signaling pathways regulating pluripotency of stem cells	[TK]	--	MH2 domain;; MH1 domain	Mothers against decapentaplegic homolog 9 OS=Homo sapiens OX=9606 GN=SMAD9 PE=1 SV=1	K	Transcription	mothers against decapentaplegic homolog 9 isoform a [Homo sapiens]
13	63100000	114364328	loss	ENSG00000182346	--	--	Cellular Component: mitochondrion (GO:0005739);; Cellular Component: Golgi apparatus (GO:0005794);; Molecular Function: enzyme activator activity (GO:0008047);; Molecular Function: enzyme binding (GO:0019899);; Biological Process: positive regulation of catalytic activity (GO:0043085);; Cellular Component: perinuclear region of cytoplasm (GO:0048471);; Biological Process: negative regulation of D…	--	--	--	--	--	D-amino acid oxidase activator	D-amino acid oxidase activator OS=Homo sapiens OX=9606 GN=DAOA PE=1 SV=2	O	Posttranslational modification, protein turnover, chaperones	D-amino acid oxidase activator isoform 1 [Homo sapiens]
13	18450000	63050000	loss	ENSG00000120686	--	--	Molecular Function: protein binding (GO:0005515);; Cellular Component: nucleus (GO:0005634);; Cellular Component: endoplasmic reticulum (GO:0005783);; Cellular Component: integral component of membrane (GO:0016021);; Biological Process: regulation of intracellular estrogen receptor signaling pathway (GO:0033146);; Biological Process: response to endoplasmic reticulum stress (GO:0034976);; Biologi…	K12162|4.46093e-48|umr:103664382|K12162 ubiquitin-fold modifier 1 | (RefSeq) UFM1; ubiquitin fold modifier 1	--		[S]	Function unknown	Ubiquitin fold modifier 1 protein	Ubiquitin-fold modifier 1 OS=Homo sapiens OX=9606 GN=UFM1 PE=1 SV=1	O	Posttranslational modification, protein turnover, chaperones	ubiquitin-fold modifier 1 isoform 1 precursor [Homo sapiens]
13	18450000	63050000	loss	ENSG00000133083	[R]	General function prediction only	Biological Process: neuron migration (GO:0001764);; Molecular Function: protein serine/threonine kinase activity (GO:0004674);; Molecular Function: signal transducer activity, downstream of receptor (GO:0005057);; Molecular Function: ATP binding (GO:0005524);; Cellular Component: intracellular (GO:0005622);; Cellular Component: integral component of plasma membrane (GO:0005887);; Biological Proce…	K08805|0|aml:100484701|K08805 doublecortin-like kinase 1/2 [EC:2.7.11.1] | (RefSeq) DCLK1; doublecortin like kinase 1	--		[T]	Signal transduction mechanisms	Protein kinase domain;; Doublecortin;; Protein tyrosine kinase;; Lipopolysaccharide kinase (Kdo/WaaP) family	Serine/threonine-protein kinase DCLK1 OS=Homo sapiens OX=9606 GN=DCLK1 PE=1 SV=2	T	Signal transduction mechanisms	PREDICTED: serine/threonine-protein kinase DCLK1 isoform X2 [Chlorocebus sabaeus]
13	63100000	114364328	loss	ENSG00000184226	[U]	Intracellular trafficking, secretion, and vesicular transport	Molecular Function: calcium ion binding (GO:0005509);; Cellular Component: plasma membrane (GO:0005886);; Biological Process: homophilic cell adhesion via plasma membrane adhesion molecules (GO:0007156);; Cellular Component: integral component of membrane (GO:0016021);; Cellular Component: growth cone (GO:0030426);; Biological Process: forebrain development (GO:0030900);; Cellular Component: cell…	K16498|0|rro:104668873|K16498 protocadherin delta 1 | (RefSeq) PCDH9; protocadherin 9	--		--	--	Cadherin domain;; Protocadherin;; Cadherin-like;; Cadherin-like	Protocadherin-9 OS=Homo sapiens OX=9606 GN=PCDH9 PE=1 SV=2	U	Intracellular trafficking, secretion, and vesicular transport	protocadherin-9 isoform 5 precursor [Homo sapiens]
13	63100000	114364328	loss	ENSG00000041515	[D]	Cell cycle control, cell division, chromosome partitioning	Molecular Function: motor activity (GO:0003774);; Molecular Function: ATP binding (GO:0005524);; Cellular Component: nucleoplasm (GO:0005654);; Cellular Component: cytosol (GO:0005829);; Cellular Component: plasma membrane (GO:0005886);; Biological Process: negative regulation of cell proliferation (GO:0008285);; Biological Process: phosphatidylinositol 3-kinase signaling (GO:0014065);; Cellular …	K17481|0|hsa:23026|K17481 myosin XVI | (RefSeq) MYO16, MYAP3, MYR8, Myo16b, NYAP3, PPP1R107; myosin XVI	--		--	--	Myosin head (motor domain);; Neuronal tyrosine-phosphorylated phosphoinositide-3-kinase adapter;; Ankyrin repeats (3 copies);; Ankyrin repeats (many copies);; Ankyrin repeats (many copies);; Ankyrin repeat;; Ankyrin repeat	Unconventional myosin-XVI OS=Homo sapiens OX=9606 GN=MYO16 PE=1 SV=3	Z	Cytoskeleton	unconventional myosin-XVI isoform 1 [Homo sapiens]
13	18450000	63050000	loss	ENSG00000102743	--	--	Biological Process: urea cycle (GO:0000050);; Molecular Function: L-ornithine transmembrane transporter activity (GO:0000064);; Biological Process: mitochondrial ornithine transport (GO:0000066);; Molecular Function: structural constituent of ribosome (GO:0003735);; Cellular Component: mitochondrial inner membrane (GO:0005743);; Biological Process: translation (GO:0006412);; Biological Process: c…	K15101|0|rro:104671106|K15101 solute carrier family 25 (mitochondrial ornithine transporter) member 2/15 | (RefSeq) SLC25A15; solute carrier family 25 member 15	--		[C]	Energy production and conversion	Mitochondrial carrier protein	Mitochondrial ornithine transporter 1 OS=Homo sapiens OX=9606 GN=SLC25A15 PE=1 SV=1	S	Function unknown	PREDICTED: mitochondrial ornithine transporter 1 isoform X1 [Cercocebus atys]
13	18450000	63050000	loss	ENSG00000102796	[C]	Energy production and conversion	Molecular Function: oxidoreductase activity (GO:0016491);; Biological Process: oxidation-reduction process (GO:0055114);;	K11168|3.48068e-161|pps:100989997|K11168 dehydrogenase/reductase SDR family member 12 [EC:1.1.-.-] | (RefSeq) DHRS12; dehydrogenase/reductase 12	--		[Q]	Secondary metabolites biosynthesis, transport and catabolism	short chain dehydrogenase;; Enoyl-(Acyl carrier protein) reductase	Dehydrogenase/reductase SDR family member 12 OS=Homo sapiens OX=9606 GN=DHRS12 PE=2 SV=2	S	Function unknown	dehydrogenase/reductase SDR family member 12 isoform 2 [Homo sapiens]
13	63100000	114364328	loss	ENSG00000102524	--	--	Molecular Function: cytokine activity (GO:0005125);; Molecular Function: tumor necrosis factor receptor binding (GO:0005164);; Cellular Component: extracellular space (GO:0005615);; Cellular Component: plasma membrane (GO:0005886);; Biological Process: immune response (GO:0006955);; Cellular Component: integral component of membrane (GO:0016021);; Biological Process: positive regulation of B cell…	K05476|1.47439e-147|hsa:10673|K05476 tumor necrosis factor ligand superfamily member 13B | (RefSeq) TNFSF13B, BAFF, BLYS, CD257, DTL, TALL-1, TALL1, THANK, TNFSF20, TNLG7A, ZTNF4; tumor necrosis factor superfamily member 13b	Rheumatoid arthritis (ko05323);; NF-kappa B signaling pathway (ko04064);; Cytokine-cytokine receptor interaction (ko04060);; Intestinal immune network for IgA production (ko04672)	ko05323:Rheumatoid arthritis;ko04064:NF-kappa B signaling pathway;ko04672:Intestinal immune network for IgA production;ko04060:Cytokine-cytokine receptor interaction	--	--	TNF(Tumour Necrosis Factor) family	Tumor necrosis factor ligand superfamily member 13B OS=Homo sapiens OX=9606 GN=TNFSF13B PE=1 SV=1	A	RNA processing and modification	tumor necrosis factor ligand superfamily member 13B isoform 2 [Homo sapiens]
13	18450000	63050000	loss	ENSG00000102738	--	--	Molecular Function: structural constituent of ribosome (GO:0003735);; Cellular Component: nucleolus (GO:0005730);; Cellular Component: mitochondrial inner membrane (GO:0005743);; Cellular Component: mitochondrial small ribosomal subunit (GO:0005763);; Molecular Function: protein domain specific binding (GO:0019904);; Molecular Function: RNA binding (GO:0044822);; Biological Process: mitochondrial…	K17410|0|hsa:10240|K17410 small subunit ribosomal protein S31 | (RefSeq) MRPS31, IMOGN38, MRP-S31, S31mt; mitochondrial ribosomal protein S31	--		--	--	Mitochondrial 28S ribosomal protein S31	28S ribosomal protein S31, mitochondrial OS=Homo sapiens OX=9606 GN=MRPS31 PE=1 SV=3	S	Function unknown	28S ribosomal protein S31, mitochondrial [Homo sapiens]
13	18450000	63050000	loss	ENSG00000136098	[M]	Cell wall/membrane/envelope biogenesis	--	K20873|0|mcf:101864959|K20873 NIMA (never in mitosis gene a)-related kinase 3 [EC:2.7.11.1] | (RefSeq) NEK3; NIMA related kinase 3	--		[R]	General function prediction only	Protein kinase domain;; Protein tyrosine kinase;; Kinase-like	Serine/threonine-protein kinase Nek3 OS=Homo sapiens OX=9606 GN=NEK3 PE=1 SV=2	T	Signal transduction mechanisms	PREDICTED: serine/threonine-protein kinase Nek3 isoform X4 [Gorilla gorilla gorilla]
13	63100000	114364328	loss	ENSG00000118922	--	--	--	K09205|0|rro:104673567|K09205 krueppel-like factor 8/12 | (RefSeq) KLF12; Kruppel like factor 12	--		[R]	General function prediction only	Zinc finger, C2H2 type;; Zinc-finger double domain;; C2H2-type zinc finger	Krueppel-like factor 12 OS=Homo sapiens OX=9606 GN=KLF12 PE=1 SV=2	S	Function unknown	PREDICTED: Krueppel-like factor 12 [Saimiri boliviensis boliviensis]
13	18450000	63050000	loss	ENSG00000179630	[P]	Inorganic ion transport and metabolism	--	K05810|0|hsa:144811|K05810 laccase domain-containing protein | (RefSeq) LACC1, C13orf31, FAMIN; laccase domain containing 1	--		--	--	Multi-copper polyphenol oxidoreductase laccase	Laccase domain-containing protein 1 OS=Homo sapiens OX=9606 GN=LACC1 PE=1 SV=1	S	Function unknown	laccase domain-containing protein 1 isoform 1 [Homo sapiens]
13	18450000	63050000	loss	ENSG00000152520	--	--	--	K12572|0|ggo:101132137|K12572 PAB-dependent poly(A)-specific ribonuclease subunit 3 | (RefSeq) PAN3; PAN3 poly(A) specific ribonuclease subunit	RNA degradation (ko03018)	ko03018:RNA degradation	[A]	RNA processing and modification	--	PAN2-PAN3 deadenylation complex subunit PAN3 OS=Homo sapiens OX=9606 GN=PAN3 PE=1 SV=3	A	RNA processing and modification	PREDICTED: PAB-dependent poly(A)-specific ribonuclease subunit PAN3 isoform X2 [Homo sapiens]
13	18450000	63050000	loss	ENSG00000083642	--	--	--	K11267|0|hsa:23047|K11267 sister chromatid cohesion protein PDS5 | (RefSeq) PDS5B, APRIN, AS3, CG008; PDS5 cohesin associated factor B	--		[D]	Cell cycle control, cell division, chromosome partitioning	--	Sister chromatid cohesion protein PDS5 homolog B OS=Homo sapiens OX=9606 GN=PDS5B PE=1 SV=1	S	Function unknown	sister chromatid cohesion protein PDS5 homolog B [Homo sapiens]
13	63100000	114364328	loss	ENSG00000102580	[R]	General function prediction only	Molecular Function: protein kinase inhibitor activity (GO:0004860);; Cellular Component: endoplasmic reticulum lumen (GO:0005788);; Cellular Component: smooth endoplasmic reticulum (GO:0005790);; Cellular Component: cytosol (GO:0005829);; Molecular Function: kinase activity (GO:0016301);; Molecular Function: protein kinase binding (GO:0019901);; Cellular Component: endoplasmic reticulum Sec compl…	K09523|0|hsa:5611|K09523 DnaJ homolog subfamily C member 3 | (RefSeq) DNAJC3, ACPHD, ERdj6, HP58, P58, P58IPK, PRKRI; DnaJ heat shock protein family (Hsp40) member C3	Protein processing in endoplasmic reticulum (ko04141);; Influenza A (ko05164)	ko05164:Influenza A;ko04141:Protein processing in endoplasmic reticulum	[V]	Defense mechanisms	Tetratricopeptide repeat;; Tetratricopeptide repeat;; Tetratricopeptide repeat;; DnaJ domain;; Tetratricopeptide repeat;; Tetratricopeptide repeat;; Tetratricopeptide repeat;; TPR repeat;; Tetratricopeptide repeat;; Tetratricopeptide repeat;; Tetratricopeptide repeat;; Tetratricopeptide repeat;; Anaphase-promoting complex, cyclosome, subunit 3;; Tetratricopeptide repeat-like domain;; Tetratricope…	DnaJ homolog subfamily C member 3 OS=Homo sapiens OX=9606 GN=DNAJC3 PE=1 SV=1	O	Posttranslational modification, protein turnover, chaperones	dnaJ homolog subfamily C member 3 [Pongo abelii]
13	18450000	63050000	loss	ENSG00000102760	--	--	Biological Process: negative regulation of exit from mitosis (GO:0001100);; Biological Process: negative regulation of endothelial cell proliferation (GO:0001937);; Biological Process: positive regulation of extracellular matrix constituent secretion (GO:0003331);; Cellular Component: nucleus (GO:0005634);; Cellular Component: centrosome (GO:0005813);; Cellular Component: cytosol (GO:0005829);; B…	--	--	--	--	--	Response gene to complement 32 protein family	Regulator of cell cycle RGCC OS=Homo sapiens OX=9606 GN=RGCC PE=1 SV=1	K	Transcription	Chromosome 13 open reading frame 15 [Homo sapiens]
13	18450000	63050000	loss	ENSG00000133114	--	--	--	--	--	--	[S]	Function unknown	Protein of unknown function (DUF3752)	GPALPP motifs-containing protein 1 OS=Homo sapiens OX=9606 GN=GPALPP1 PE=1 SV=1	S	Function unknown	GPALPP motifs-containing protein 1 isoform a [Homo sapiens]
13	63100000	114364328	loss	ENSG00000283208	--	--	Molecular Function: protein binding (GO:0005515);; Cellular Component: nucleus (GO:0005634);; Biological Process: regulation of transcription, DNA-templated (GO:0006355);; Molecular Function: zinc ion binding (GO:0008270);; Cellular Component: membrane (GO:0016020);; Biological Process: protein ubiquitination (GO:0016567);; Molecular Function: ligase activity (GO:0016874);;	K10693|0|ptr:452608|K10693 E3 ubiquitin-protein ligase MYCBP2 [EC:2.3.2.27] | (RefSeq) MYCBP2; MYC binding protein 2, E3 ubiquitin protein ligase	--		[T]	Signal transduction mechanisms	Ceroid-lipofuscinosis neuronal protein 5	E3 ubiquitin-protein ligase MYCBP2 OS=Homo sapiens OX=9606 GN=MYCBP2 PE=1 SV=3	O	Posttranslational modification, protein turnover, chaperones	hypothetical protein, partial [Homo sapiens]
13	18450000	63050000	loss	ENSG00000197168	[R]	General function prediction only	--	K08857|0|hsa:341676|K08857 NIMA (never in mitosis gene a)-related kinase 1/4/5 [EC:2.7.11.1] | (RefSeq) NEK5; NIMA related kinase 5	--		[R]	General function prediction only	Protein kinase domain;; Protein tyrosine kinase;; Kinase-like	Serine/threonine-protein kinase Nek5 OS=Homo sapiens OX=9606 GN=NEK5 PE=2 SV=1	T	Signal transduction mechanisms	PREDICTED: serine/threonine-protein kinase Nek5 isoform X6 [Homo sapiens]
13	63100000	114364328	loss	ENSG00000102471	--	--	Cellular Component: Golgi membrane (GO:0000139);; Molecular Function: signal transducer activity (GO:0004871);; Cellular Component: mitochondrion (GO:0005739);; Cellular Component: endoplasmic reticulum (GO:0005783);; Biological Process: vacuolar transport (GO:0007034);; Biological Process: negative regulation of gene expression (GO:0010629);; Cellular Component: integral component of membrane (G…	--	--	--	[R]	General function prediction only	Protein of unknown function (DUF2370)	NEDD4 family-interacting protein 2 OS=Homo sapiens OX=9606 GN=NDFIP2 PE=1 SV=2	U	Intracellular trafficking, secretion, and vesicular transport	NEDD4 family-interacting protein 2 isoform 1 [Homo sapiens]
13	63100000	114364328	loss	ENSG00000134874	--	--	Molecular Function: nucleic acid binding (GO:0003676);; Molecular Function: protein binding (GO:0005515);; Cellular Component: nucleoplasm (GO:0005654);; Cellular Component: centriole (GO:0005814);; Biological Process: smoothened signaling pathway (GO:0007224);; Biological Process: multicellular organism development (GO:0007275);; Biological Process: germ cell development (GO:0007281);; Biologica…	K16470|0|ggo:101135733|K16470 zinc finger protein DZIP1 | (RefSeq) DZIP1; DAZ interacting zinc finger protein 1	--		--	--	Iguana/Dzip1-like DAZ-interacting protein N-terminal	Zinc finger protein DZIP1 OS=Homo sapiens OX=9606 GN=DZIP1 PE=1 SV=1	S	Function unknown	zinc finger protein DZIP1 isoform 1 [Homo sapiens]
13	63100000	114364328	loss	ENSG00000005810	[DZ]	Cell cycle control, cell division, chromosome partitioning ;; Cytoskeleton	Molecular Function: protein binding (GO:0005515);; Cellular Component: nucleus (GO:0005634);; Biological Process: regulation of transcription, DNA-templated (GO:0006355);; Molecular Function: zinc ion binding (GO:0008270);; Cellular Component: membrane (GO:0016020);; Biological Process: protein ubiquitination (GO:0016567);; Molecular Function: ligase activity (GO:0016874);;	K10693|0|hsa:23077|K10693 E3 ubiquitin-protein ligase MYCBP2 [EC:2.3.2.27] | (RefSeq) MYCBP2, Myc-bp2, PAM, Phr; MYC binding protein 2, E3 ubiquitin protein ligase	--		[T]	Signal transduction mechanisms	PHR domain;; Regulator of chromosome condensation (RCC1) repeat;; Regulator of chromosome condensation (RCC1) repeat;; Bacterial SH3 domain;; Ring finger domain;; Filamin/ABP280 repeat;; Anaphase-promoting complex, subunit 10 (APC10)	E3 ubiquitin-protein ligase MYCBP2 OS=Homo sapiens OX=9606 GN=MYCBP2 PE=1 SV=3	O	Posttranslational modification, protein turnover, chaperones	E3 ubiquitin-protein ligase MYCBP2 [Homo sapiens]
13	63100000	114364328	loss	ENSG00000150361	[M]	Cell wall/membrane/envelope biogenesis	Molecular Function: actin binding (GO:0003779);; Molecular Function: ubiquitin-protein transferase activity (GO:0004842);; Cellular Component: cytoplasm (GO:0005737);; Cellular Component: cytoskeleton (GO:0005856);; Biological Process: adult walking behavior (GO:0007628);; Biological Process: dendrite development (GO:0016358);; Biological Process: protein ubiquitination (GO:0016567);; Biological …	K10442|0|pps:100992954|K10442 kelch-like protein 1/4/5 | (RefSeq) KLHL1; kelch like family member 1	--		[TR]	--	Kelch motif;; Kelch motif;; Galactose oxidase, central domain;; BTB And C-terminal Kelch;; Kelch motif;; BTB/POZ domain;; Galactose oxidase, central domain	Kelch-like protein 1 OS=Homo sapiens OX=9606 GN=KLHL1 PE=2 SV=1	S	Function unknown	PREDICTED: kelch-like protein 1 isoform X1 [Colobus angolensis palliatus]
13	18450000	63050000	loss	ENSG00000188811	[R]	General function prediction only	Cellular Component: extracellular exosome (GO:0070062);;	--	--	--	[O]	Posttranslational modification, protein turnover, chaperones	NHL repeat	NHL repeat-containing protein 3 OS=Homo sapiens OX=9606 GN=NHLRC3 PE=2 SV=1	S	Function unknown	NHL repeat-containing protein 3 isoform a precursor [Homo sapiens]
13	18450000	63050000	loss	ENSG00000132964	[T]	Signal transduction mechanisms	Molecular Function: cyclin-dependent protein serine/threonine kinase activity (GO:0004693);; Molecular Function: protein binding (GO:0005515);; Molecular Function: ATP binding (GO:0005524);; Biological Process: transcription initiation from RNA polymerase II promoter (GO:0006367);; Biological Process: protein phosphorylation (GO:0006468);; Molecular Function: RNA polymerase II carboxy-terminal do…	K02208|0|rro:104659984|K02208 cyclin-dependent kinase 8/11 [EC:2.7.11.22 2.7.11.23] | (RefSeq) CDK8; cyclin dependent kinase 8	--		[K]	Transcription	Protein kinase domain;; Protein tyrosine kinase	Cyclin-dependent kinase 8 OS=Homo sapiens OX=9606 GN=CDK8 PE=1 SV=1	T	Signal transduction mechanisms	cyclin-dependent kinase 8 isoform 1 [Homo sapiens]
13	63100000	114364328	loss	ENSG00000102466	--	--	Biological Process: positive regulation of defense response to virus by host (GO:0002230);; Molecular Function: fibroblast growth factor receptor binding (GO:0005104);; Cellular Component: extracellular region (GO:0005576);; Cellular Component: nucleus (GO:0005634);; Biological Process: JNK cascade (GO:0007254);; Biological Process: nervous system development (GO:0007399);; Molecular Function: gr…	K04358|2.62892e-167|nle:100593119|K04358 fibroblast growth factor | (RefSeq) FGF14; fibroblast growth factor 14	Rap1 signaling pathway (ko04015);; MAPK signaling pathway (ko04010);; Ras signaling pathway (ko04014);; PI3K-Akt signaling pathway (ko04151);; Regulation of actin cytoskeleton (ko04810);; Pathways in cancer (ko05200);; Melanoma (ko05218)	ko04010:MAPK signaling pathway;ko04810:Regulation of actin cytoskeleton;ko04151:PI3K-Akt signaling pathway;ko05218:Melanoma;ko04015:Rap1 signaling pathway;ko05200:Pathways in cancer;ko04014:Ras signaling pathway	[T]	Signal transduction mechanisms	Fibroblast growth factor	Fibroblast growth factor 14 OS=Homo sapiens OX=9606 GN=FGF14 PE=1 SV=1	T	Signal transduction mechanisms	fibroblast growth factor 14 isoform 1B [Homo sapiens]
13	18450000	63050000	loss	ENSG00000132965	[S]	Function unknown	Biological Process: leukotriene production involved in inflammatory response (GO:0002540);; Biological Process: positive regulation of acute inflammatory response (GO:0002675);; Molecular Function: arachidonate 5-lipoxygenase activity (GO:0004051);; Molecular Function: glutathione transferase activity (GO:0004364);; Molecular Function: leukotriene-C4 synthase activity (GO:0004464);; Molecular Fun…	K20735|5.55704e-146|ptr:452520|K20735 arachidonate 5-lipoxygenase-activating protein | (RefSeq) ALOX5AP; arachidonate 5-lipoxygenase activating protein	--		--	--	MAPEG family	Arachidonate 5-lipoxygenase-activating protein OS=Homo sapiens OX=9606 GN=ALOX5AP PE=1 SV=2	U	Intracellular trafficking, secretion, and vesicular transport	arachidonate 5-lipoxygenase-activating protein isoform 2 [Homo sapiens]
13	63100000	114364328	loss	ENSG00000134901	--	--	Cellular Component: endoplasmic reticulum lumen (GO:0005788);; Biological Process: glycolipid metabolic process (GO:0006664);; Molecular Function: glucosyltransferase activity (GO:0046527);;	--	--	--	[R]	General function prediction only	Glycosyl transferase family 90;; Filamin/ABP280 repeat	KDEL motif-containing protein 1 OS=Homo sapiens OX=9606 GN=KDELC1 PE=1 SV=1	S	Function unknown	KDEL motif-containing protein 1 isoform 1 precursor [Homo sapiens]
13	18450000	63050000	loss	ENSG00000136110	--	--	--	--	--	--	--	--	BRICHOS domain	Leukocyte cell-derived chemotaxin 1 OS=Homo sapiens OX=9606 GN=CNMD PE=1 SV=1	U	Intracellular trafficking, secretion, and vesicular transport	leukocyte cell derived chemotaxin 1, isoform CRA_a [Homo sapiens]
13	18450000	63050000	loss	ENSG00000197991	[S]	Function unknown	Molecular Function: calcium ion binding (GO:0005509);; Cellular Component: plasma membrane (GO:0005886);; Biological Process: homophilic cell adhesion via plasma membrane adhesion molecules (GO:0007156);; Cellular Component: integral component of membrane (GO:0016021);; Molecular Function: RNA binding (GO:0044822);;	K16498|0|hsa:64881|K16498 protocadherin delta 1 | (RefSeq) PCDH20, PCDH13; protocadherin 20	--		--	--	Cadherin domain;; Cadherin-like	Protocadherin-20 OS=Homo sapiens OX=9606 GN=PCDH20 PE=2 SV=2	U	Intracellular trafficking, secretion, and vesicular transport	protocadherin-20 precursor [Homo sapiens]
13	18450000	63050000	loss	ENSG00000123171	--	--	--	--	--	--	--	--	--	Coiled-coil domain-containing protein 70 OS=Homo sapiens OX=9606 GN=CCDC70 PE=1 SV=1	S	Function unknown	PREDICTED: coiled-coil domain-containing protein 70 isoform X1 [Nomascus leucogenys]
13	18450000	63050000	loss	ENSG00000215475	--	--	Cellular Component: nucleus (GO:0005634);; Cellular Component: mitochondrion (GO:0005739);; Biological Process: apoptotic process (GO:0006915);; Biological Process: multicellular organism development (GO:0007275);; Molecular Function: ligase activity (GO:0016874);; Biological Process: regulation of protein stability (GO:0031647);; Biological Process: protein ubiquitination involved in ubiquitin-d…	--	--	--	[R]	General function prediction only	Seven in absentia protein family	Seven in absentia homolog 3 OS=Homo sapiens OX=9606 GN=SIAH3 PE=2 SV=3	O	Posttranslational modification, protein turnover, chaperones	hCG2039360, partial [Homo sapiens]
13	18450000	63050000	loss	ENSG00000253710	--	--	Molecular Function: protein binding (GO:0005515);; Cellular Component: nucleoplasm (GO:0005654);; Cellular Component: nucleolus (GO:0005730);; Biological Process: multicellular organism development (GO:0007275);; Biological Process: spermatogenesis (GO:0007283);; Cellular Component: viral nucleocapsid (GO:0019013);; Biological Process: cell differentiation (GO:0030154);; Biological Process: matur…	K14567|0|hsa:9724|K14567 U3 small nucleolar RNA-associated protein 14 | (RefSeq) UTP14C, 2700066J21Rik, KIAA0266, UTP14B; UTP14, small subunit processome component homolog C (S. cerevisiae)	Ribosome biogenesis in eukaryotes (ko03008)	ko03008:Ribosome biogenesis in eukaryotes	[S]	Function unknown	Utp14 protein;; ALG11 mannosyltransferase N-terminus;; Glycosyl transferases group 1	U3 small nucleolar RNA-associated protein 14 homolog C OS=Homo sapiens OX=9606 GN=UTP14C PE=1 SV=1	S	Function unknown	U3 small nucleolar RNA-associated protein 14 homolog C [Homo sapiens]
13	63100000	114364328	loss	ENSG00000204442	--	--	Cellular Component: integral component of membrane (GO:0016021);;	--	--	--	--	--	--	Transmembrane protein FAM155A OS=Homo sapiens OX=9606 GN=FAM155A PE=2 SV=1	S	Function unknown	transmembrane protein FAM155A [Homo sapiens]
13	18450000	63050000	loss	ENSG00000118946	[S]	Function unknown	--	K16499|0|hsa:27253|K16499 protocadherin delta 2 | (RefSeq) PCDH17, PCDH68, PCH68; protocadherin 17	--		[S]	Function unknown	Cadherin domain;; Cadherin-like;; Cadherin-like	Protocadherin-17 OS=Homo sapiens OX=9606 GN=PCDH17 PE=2 SV=2	U	Intracellular trafficking, secretion, and vesicular transport	protocadherin-17 precursor [Homo sapiens]
13	18450000	63050000	loss	ENSG00000083635	--	--	--	--	--	--	--	--	Nuclear fragile X mental retardation-interacting protein 1 (NUFIP1);; Zinc-finger double-stranded RNA-binding	Nuclear fragile X mental retardation-interacting protein 1 OS=Homo sapiens OX=9606 GN=NUFIP1 PE=1 SV=2	S	Function unknown	nuclear fragile X mental retardation-interacting protein 1 [Homo sapiens]
13	18450000	63050000	loss	ENSG00000136167	--	--	--	K17276|0|ptg:102960827|K17276 plastin-2 | (RefSeq) LCP1; lymphocyte cytosolic protein 1	--		[Z]	Cytoskeleton	Calponin homology (CH) domain;; EF hand;; EF-hand domain pair;; EF-hand domain;; EF hand;; EF-hand domain pair;; CAMSAP CH domain	Plastin-2 OS=Homo sapiens OX=9606 GN=LCP1 PE=1 SV=6	Z	Cytoskeleton	plastin-2 [Homo sapiens]
13	63100000	114364328	loss	ENSG00000152193	--	--	--	--	--	--	--	--	Zinc finger, C3HC4 type (RING finger);; Ring finger domain;; Zinc finger, C3HC4 type (RING finger)	RING finger protein 219 OS=Homo sapiens OX=9606 GN=RNF219 PE=1 SV=1	S	Function unknown	PREDICTED: RING finger protein 219 isoform X1 [Macaca nemestrina]
13	18450000	63050000	loss	ENSG00000102755	[U]	Intracellular trafficking, secretion, and vesicular transport	Biological Process: activation of MAPKK activity (GO:0000186);; Biological Process: response to hypoxia (GO:0001666);; Biological Process: monocyte chemotaxis (GO:0002548);; Molecular Function: ATP binding (GO:0005524);; Cellular Component: extracellular space (GO:0005615);; Cellular Component: endosome (GO:0005768);; Cellular Component: integral component of plasma membrane (GO:0005887);; Cellul…	K05096|0|hsa:2321|K05096 FMS-like tyrosine kinase 1 [EC:2.7.10.1] | (RefSeq) FLT1, FLT, FLT-1, VEGFR-1, VEGFR1; fms related tyrosine kinase 1	Ras signaling pathway (ko04014);; Focal adhesion (ko04510);; Transcriptional misregulation in cancer (ko05202);; Rheumatoid arthritis (ko05323);; Endocytosis (ko04144);; PI3K-Akt signaling pathway (ko04151);; Rap1 signaling pathway (ko04015);; Cytokine-cytokine receptor interaction (ko04060);; HIF-1 signaling pathway (ko04066)	ko04060:Cytokine-cytokine receptor interaction;ko04014:Ras signaling pathway;ko04015:Rap1 signaling pathway;ko05323:Rheumatoid arthritis;ko04510:Focal adhesion;ko04151:PI3K-Akt signaling pathway;ko05202:Transcriptional misregulation in cancer;ko04144:Endocytosis;ko04066:HIF-1 signaling pathway	[T]	Signal transduction mechanisms	Protein tyrosine kinase;; Immunoglobulin domain;; Immunoglobulin I-set domain;; Protein kinase domain;; Immunoglobulin domain;; Immunoglobulin domain;; Immunoglobulin V-set domain;; Immunoglobulin C1-set domain;; Izumo-like Immunoglobulin domain	Vascular endothelial growth factor receptor 1 OS=Homo sapiens OX=9606 GN=FLT1 PE=1 SV=2	T	Signal transduction mechanisms	unnamed protein product [Homo sapiens]
13	18450000	63050000	loss	ENSG00000133107	--	--	Cellular Component: integral component of plasma membrane (GO:0005887);; Cellular Component: caveola (GO:0005901);; Cellular Component: cell-cell junction (GO:0005911);; Biological Process: manganese ion transport (GO:0006828);; Molecular Function: beta-catenin binding (GO:0008013);; Cellular Component: cell surface (GO:0009986);; Biological Process: gamma-aminobutyric acid secretion (GO:0014051)…	K04967|0|pon:100453863|K04967 transient receptor potential cation channel subfamily C member 4 | (RefSeq) TRPC4; transient receptor potential cation channel subfamily C member 4	Axon guidance (ko04360)	ko04360:Axon guidance	[PT]	--	Ion transport protein;; Transient receptor ion channel II;; Ankyrin repeats (3 copies);; Ankyrin repeats (many copies);; Ankyrin repeat;; Ankyrin repeat	Short transient receptor potential channel 4 OS=Homo sapiens OX=9606 GN=TRPC4 PE=1 SV=1	U	Intracellular trafficking, secretion, and vesicular transport	Transient receptor potential 4 [Homo sapiens]
13	63100000	114364328	loss	ENSG00000125249	[R]	General function prediction only	Molecular Function: transcription coactivator activity (GO:0003713);; Molecular Function: GTPase activity (GO:0003924);; Molecular Function: GTP binding (GO:0005525);; Cellular Component: lipid droplet (GO:0005811);; Cellular Component: cytosol (GO:0005829);; Cellular Component: plasma membrane (GO:0005886);; Cellular Component: bicellular tight junction (GO:0005923);; Molecular Function: GDP bin…	K07837|1.30328e-100|pon:100172918|K07837 Ras-related protein Rap-2A | (RefSeq) RAP2A; RAP2A, member of RAS oncogene family	--		[R]	General function prediction only	Ras family;; Ras of Complex, Roc, domain of DAPkinase;; ADP-ribosylation factor family;; RsgA GTPase	Ras-related protein Rap-2a OS=Homo sapiens OX=9606 GN=RAP2A PE=1 SV=1	S	Function unknown	ras-related protein Rap-2a precursor [Homo sapiens]
13	18450000	63050000	loss	ENSG00000136114	--	--	--	--	--	--	--	--	--	Thrombospondin type-1 domain-containing protein 1 OS=Homo sapiens OX=9606 GN=THSD1 PE=2 SV=1	U	Intracellular trafficking, secretion, and vesicular transport	thrombospondin type-1 domain-containing protein 1 isoform 2 precursor [Homo sapiens]
13	18450000	63050000	loss	ENSG00000122025	[T]	Signal transduction mechanisms	--	K05092|0|hsa:2322|K05092 fms-related tyrosine kinase 3 [EC:2.7.10.1] | (RefSeq) FLT3, CD135, FLK-2, FLK2, STK1; fms related tyrosine kinase 3	Acute myeloid leukemia (ko05221);; Cytokine-cytokine receptor interaction (ko04060);; Transcriptional misregulation in cancer (ko05202);; Hematopoietic cell lineage (ko04640);; Pathways in cancer (ko05200);; Central carbon metabolism in cancer (ko05230)	ko05221:Acute myeloid leukemia;ko04060:Cytokine-cytokine receptor interaction;ko05200:Pathways in cancer;ko04640:Hematopoietic cell lineage;ko05230:Central carbon metabolism in cancer;ko05202:Transcriptional misregulation in cancer	[T]	Signal transduction mechanisms	Protein tyrosine kinase;; Protein kinase domain;; Immunoglobulin domain;; Immunoglobulin I-set domain;; Immunoglobulin domain;; Immunoglobulin domain	Receptor-type tyrosine-protein kinase FLT3 OS=Homo sapiens OX=9606 GN=FLT3 PE=1 SV=2	T	Signal transduction mechanisms	receptor-type tyrosine-protein kinase FLT3 precursor [Homo sapiens]
13	63100000	114364328	loss	ENSG00000088451	[M]	Cell wall/membrane/envelope biogenesis	--	K01710|0|hsa:23483|K01710 dTDP-glucose 4,6-dehydratase [EC:4.2.1.46] | (RefSeq) TGDS, CATMANS, SDR2E1, TDPGD; TDP-glucose 4,6-dehydratase	--		[G]	Carbohydrate transport and metabolism	GDP-mannose 4,6 dehydratase;; NAD dependent epimerase/dehydratase family;; 3-beta hydroxysteroid dehydrogenase/isomerase family;; Polysaccharide biosynthesis protein;; RmlD substrate binding domain;; Male sterility protein	dTDP-D-glucose 4,6-dehydratase OS=Homo sapiens OX=9606 GN=TGDS PE=1 SV=1	M	Cell wall/membrane/envelope biogenesis	dTDP-D-glucose 4,6-dehydratase isoform 1 [Homo sapiens]
13	18450000	63050000	loss	ENSG00000139515	--	--	--	K07594|6.17226e-110|hsa:3651|K07594 insulin promoter factor 1 | (RefSeq) PDX1, GSF, IDX-1, IPF1, IUF1, MODY4, PAGEN1, PDX-1, STF-1; pancreatic and duodenal homeobox 1	Type II diabetes mellitus (ko04930);; Insulin secretion (ko04911);; Maturity onset diabetes of the young (ko04950)	ko04911:Insulin secretion;ko04950:Maturity onset diabetes of the young;ko04930:Type II diabetes mellitus	[R]	General function prediction only	Homeobox domain	Pancreas/duodenum homeobox protein 1 OS=Homo sapiens OX=9606 GN=PDX1 PE=1 SV=1	K	Transcription	pancreas/duodenum homeobox protein 1 [Papio anubis]
13	63100000	114364328	loss	ENSG00000139797	--	--	--	K15696|0|hsa:140432|K15696 RING finger protein 113B | (RefSeq) RNF113B, RNF161, ZNF183L1, bA10G5.1; ring finger protein 113B	--		[O]	Posttranslational modification, protein turnover, chaperones	Zinc finger C-x8-C-x5-C-x3-H type (and similar);; Zinc finger, C3HC4 type (RING finger);; Zinc finger, C3HC4 type (RING finger);; Zinc finger, C3HC4 type (RING finger)	RING finger protein 113B OS=Homo sapiens OX=9606 GN=RNF113B PE=1 SV=3	S	Function unknown	RING finger protein 113B [Homo sapiens]
13	18450000	63050000	loss	ENSG00000122035	--	--	--	K07852|6.79637e-160|ptr:735429|K07852 Ras-like protein family member 11A | (RefSeq) RASL11A; RAS like family 11 member A	--		[R]	General function prediction only	Ras family;; Ras of Complex, Roc, domain of DAPkinase;; 50S ribosome-binding GTPase	Ras-like protein family member 11A OS=Homo sapiens OX=9606 GN=RASL11A PE=2 SV=1	S	Function unknown	PREDICTED: ras-like protein family member 11A [Mandrillus leucophaeus]
13	18450000	63050000	loss	ENSG00000120690	--	--	Molecular Function: RNA polymerase II core promoter proximal region sequence-specific DNA binding (GO:0000978);; Molecular Function: transcriptional activator activity, RNA polymerase II core promoter proximal region sequence-specific binding (GO:0001077);; Biological Process: regulation of cytokine production (GO:0001817);; Molecular Function: protein binding (GO:0005515);; Cellular Component: n…	K09428|0|hsa:1997|K09428 E74-like factor 1/2/4 | (RefSeq) ELF1; E74 like ETS transcription factor 1	--		[K]	Transcription	Transcription factor protein N terminal;; Ets-domain	ETS-related transcription factor Elf-1 OS=Homo sapiens OX=9606 GN=ELF1 PE=1 SV=2	K	Transcription	ETS-related transcription factor Elf-1 isoform a [Homo sapiens]
13	18450000	63050000	loss	ENSG00000165572	[M]	Cell wall/membrane/envelope biogenesis	--	K10474|0|ptr:452556|K10474 kelch repeat and BTB domain-containing protein 6/7 | (RefSeq) KBTBD6; kelch repeat and BTB domain containing 6	--		--	--	BTB/POZ domain;; BTB And C-terminal Kelch;; Kelch motif;; Kelch motif;; Galactose oxidase, central domain;; Galactose oxidase, central domain;; Kelch motif	Kelch repeat and BTB domain-containing protein 6 OS=Homo sapiens OX=9606 GN=KBTBD6 PE=1 SV=1	S	Function unknown	kelch repeat and BTB domain-containing protein 6 [Homo sapiens]
13	18450000	63050000	loss	ENSG00000120658	--	--	Molecular Function: nucleotide binding (GO:0000166);; Molecular Function: nucleic acid binding (GO:0003676);; Molecular Function: protein binding (GO:0005515);; Cellular Component: extracellular space (GO:0005615);; Cellular Component: plasma membrane (GO:0005886);; Molecular Function: oxidoreductase activity (GO:0016491);; Biological Process: rhythmic process (GO:0048511);; Biological Process: o…	--	--	--	--	--	RNA recognition motif. (a.k.a. RRM, RBD, or RNP domain)	Ecto-NOX disulfide-thiol exchanger 1 OS=Homo sapiens OX=9606 GN=ENOX1 PE=1 SV=1	S	Function unknown	ecto-NOX disulfide-thiol exchanger 1 isoform a [Homo sapiens]
13	63100000	114364328	loss	ENSG00000005812	--	--	Molecular Function: ubiquitin-protein transferase activity (GO:0004842);; Molecular Function: protein binding (GO:0005515);; Cellular Component: nucleus (GO:0005634);; Cellular Component: cytosol (GO:0005829);; Biological Process: protein ubiquitination (GO:0016567);; Cellular Component: SCF ubiquitin ligase complex (GO:0019005);; Biological Process: SCF-dependent proteasomal ubiquitin-dependent …	K10269|0|pps:100983358|K10269 F-box and leucine-rich repeat protein 3 | (RefSeq) FBXL3; F-box and leucine rich repeat protein 3	Circadian rhythm (ko04710)	ko04710:Circadian rhythm	--	--	F-box-like;; F-box domain	F-box/LRR-repeat protein 3 OS=Homo sapiens OX=9606 GN=FBXL3 PE=1 SV=1	O	Posttranslational modification, protein turnover, chaperones	F-box/LRR-repeat protein 3 [Homo sapiens]
13	18450000	63050000	loss	ENSG00000132938	--	--	Cellular Component: nucleus (GO:0005634);; Cellular Component: centrosome (GO:0005813);; Cellular Component: cytoplasmic microtubule (GO:0005881);; Molecular Function: microtubule binding (GO:0008017);; Molecular Function: protein homodimerization activity (GO:0042803);;	--	--	--	--	--	--	Microtubule-associated tumor suppressor candidate 2 OS=Homo sapiens OX=9606 GN=MTUS2 PE=1 SV=3	Z	Cytoskeleton	microtubule-associated tumor suppressor candidate 2 isoform a [Homo sapiens]
13	18450000	63050000	loss	ENSG00000139679	--	--	--	K04273|0|ptr:741241|K04273 lysophosphatidic acid receptor 6 | (RefSeq) LPAR6, P2RY5; lysophosphatidic acid receptor 6	PI3K-Akt signaling pathway (ko04151);; Phospholipase D signaling pathway (ko04072);; Neuroactive ligand-receptor interaction (ko04080);; Pathways in cancer (ko05200)	ko04080:Neuroactive ligand-receptor interaction;ko04072:Phospholipase D signaling pathway;ko04151:PI3K-Akt signaling pathway;ko05200:Pathways in cancer	--	--	7 transmembrane receptor (rhodopsin family)	Lysophosphatidic acid receptor 6 OS=Homo sapiens OX=9606 GN=LPAR6 PE=1 SV=3	U	Intracellular trafficking, secretion, and vesicular transport	lysophosphatidic acid receptor 6 [Homo sapiens]
13	18450000	63050000	loss	ENSG00000186047	--	--	--	--	--	--	--	--	Leukemia-associated protein 7	Leukemia-associated protein 7 OS=Homo sapiens OX=9606 GN=DLEU7 PE=2 SV=1	S	Function unknown	leukemia-associated protein 7 isoform 2 [Homo sapiens]
13	18450000	63050000	loss	ENSG00000120659	--	--	Biological Process: ossification (GO:0001503);; Biological Process: osteoclast proliferation (GO:0002158);; Biological Process: monocyte chemotaxis (GO:0002548);; Molecular Function: cytokine activity (GO:0005125);; Molecular Function: tumor necrosis factor receptor binding (GO:0005164);; Cellular Component: extracellular space (GO:0005615);; Cellular Component: cytoplasm (GO:0005737);; Cellular …	K05473|0|hsa:8600|K05473 tumor necrosis factor ligand superfamily member 11 | (RefSeq) TNFSF11, CD254, ODF, OPGL, OPTB2, RANKL, TNLG6B, TRANCE, hRANKL2, sOdf; tumor necrosis factor superfamily member 11	NF-kappa B signaling pathway (ko04064);; Rheumatoid arthritis (ko05323);; Prolactin signaling pathway (ko04917);; Osteoclast differentiation (ko04380);; Cytokine-cytokine receptor interaction (ko04060)	ko04380:Osteoclast differentiation;ko04917:Prolactin signaling pathway;ko04060:Cytokine-cytokine receptor interaction;ko04064:NF-kappa B signaling pathway;ko05323:Rheumatoid arthritis	--	--	TNF(Tumour Necrosis Factor) family	Tumor necrosis factor ligand superfamily member 11 OS=Homo sapiens OX=9606 GN=TNFSF11 PE=1 SV=1	T	Signal transduction mechanisms	tumor necrosis factor ligand superfamily member 11 isoform 1 [Homo sapiens]
13	18450000	63050000	loss	ENSG00000136104	--	--	--	K10744|9.68558e-144|ptr:452726|K10744 ribonuclease H2 subunit B | (RefSeq) RNASEH2B; ribonuclease H2 subunit B	DNA replication (ko03030)	ko03030:DNA replication	[S]	Function unknown	Ydr279p protein family (RNase H2 complex component)	Ribonuclease H2 subunit B OS=Homo sapiens OX=9606 GN=RNASEH2B PE=1 SV=1	S	Function unknown	PREDICTED: ribonuclease H2 subunit B isoform X2 [Homo sapiens]
13	18450000	63050000	loss	ENSG00000139514	[E]	Amino acid transport and metabolism	--	K13863|0|hsa:6541|K13863 solute carrier family 7 (cationic amino acid transporter), member 1 | (RefSeq) SLC7A1, ATRC1, CAT-1, ERR, HCAT1, REC1L; solute carrier family 7 member 1	MicroRNAs in cancer (ko05206)	ko05206:MicroRNAs in cancer	[E]	Amino acid transport and metabolism	Amino acid permease;; Amino acid permease;; C-terminus of AA_permease	High affinity cationic amino acid transporter 1 OS=Homo sapiens OX=9606 GN=SLC7A1 PE=1 SV=1	E	Amino acid transport and metabolism	high affinity cationic amino acid transporter 1 [Homo sapiens]
13	18450000	63050000	loss	ENSG00000083544	--	--	--	K18404|0|pps:100988401|K18404 tudor domain-containing protein 3 | (RefSeq) TDRD3; tudor domain containing 3	--		[S]	Function unknown	RecQ mediated genome instability protein;; Tudor domain;; Survival motor neuron protein (SMN);; UBA/TS-N domain	Tudor domain-containing protein 3 OS=Homo sapiens OX=9606 GN=TDRD3 PE=1 SV=1	S	Function unknown	tudor domain containing 3, isoform CRA_b [Homo sapiens]
13	63100000	114364328	loss	ENSG00000136158	--	--	--	K17383|2.45851e-180|rro:104661261|K17383 protein sprouty homolog 2 | (RefSeq) SPRY2; sprouty RTK signaling antagonist 2	MicroRNAs in cancer (ko05206)	ko05206:MicroRNAs in cancer	--	--	Sprouty protein (Spry)	Protein sprouty homolog 2 OS=Homo sapiens OX=9606 GN=SPRY2 PE=1 SV=1	S	Function unknown	protein sprouty homolog 2 [Homo sapiens]
13	63100000	114364328	loss	ENSG00000125245	--	--	Molecular Function: G-protein coupled receptor activity (GO:0004930);; Cellular Component: plasma membrane (GO:0005886);; Biological Process: G-protein coupled receptor signaling pathway (GO:0007186);; Cellular Component: integral component of membrane (GO:0016021);;	K08410|0|ptr:738311|K08410 G protein-coupled receptor 18 | (RefSeq) GPR18; G protein-coupled receptor 18	--		--	--	7 transmembrane receptor (rhodopsin family)	N-arachidonyl glycine receptor OS=Homo sapiens OX=9606 GN=GPR18 PE=1 SV=2	U	Intracellular trafficking, secretion, and vesicular transport	N-arachidonyl glycine receptor [Homo sapiens]
13	18450000	63050000	loss	ENSG00000102710	--	--	Cellular Component: SAGA complex (GO:0000124);; Molecular Function: transcription cofactor activity (GO:0003712);; Molecular Function: protein binding (GO:0005515);; Biological Process: autophagy (GO:0006914);; Biological Process: gastrulation (GO:0007369);; Biological Process: positive regulation of gluconeogenesis by positive regulation of transcription from RNA polymerase II promoter (GO:00359…	K21245|0|pps:100985841|K21245 transcription factor SPT20 homolog | (RefSeq) SUPT20H, FAM48A; SPT20 homolog, SAGA complex component	--		--	--	Spt20 family	Transcription factor SPT20 homolog OS=Homo sapiens OX=9606 GN=SUPT20H PE=1 SV=2	S	Function unknown	PREDICTED: transcription factor SPT20 homolog isoform X5 [Homo sapiens]
13	18450000	63050000	loss	ENSG00000139618	--	--	--	K08775|0|hsa:675|K08775 breast cancer 2 susceptibility protein | (RefSeq) BRCA2, BRCC2, BROVCA2, FACD, FAD, FAD1, FANCD, FANCD1, GLM3, PNCA2, XRCC11; BRCA2, DNA repair associated	Fanconi anemia pathway (ko03460);; Pathways in cancer (ko05200);; Homologous recombination (ko03440);; Pancreatic cancer (ko05212)	ko05200:Pathways in cancer;ko03460:Fanconi anemia pathway;ko03440:Homologous recombination;ko05212:Pancreatic cancer	[L]	Replication, recombination and repair	BRCA2, helical;; BRCA2 repeat;; BRCA2, oligonucleotide/oligosaccharide-binding, domain 3;; BRCA2, oligonucleotide/oligosaccharide-binding, domain 1;; Tower	Breast cancer type 2 susceptibility protein OS=Homo sapiens OX=9606 GN=BRCA2 PE=1 SV=3	S	Function unknown	breast cancer type 2 susceptibility protein [Homo sapiens]
13	18450000	63050000	loss	ENSG00000174015	--	--	Molecular Function: DNA binding (GO:0003677);; Molecular Function: protein binding (GO:0005515);;	--	--	--	--	--	Chibby family	Spermatid-associated protein OS=Homo sapiens OX=9606 GN=SPERT PE=1 SV=1	S	Function unknown	PREDICTED: spermatid-associated protein isoform X1 [Homo sapiens]
13	63100000	114364328	loss	ENSG00000151287	[R]	General function prediction only	--	--	--	--	[R]	General function prediction only	Dienelactone hydrolase family	Testis-expressed protein 30 OS=Homo sapiens OX=9606 GN=TEX30 PE=2 SV=1	S	Function unknown	testis-expressed protein 30 isoform 1 [Homo sapiens]
13	18450000	63050000	loss	ENSG00000189403	--	--	Molecular Function: four-way junction DNA binding (GO:0000400);; Molecular Function: bubble DNA binding (GO:0000405);; Cellular Component: nuclear chromatin (GO:0000790);; Cellular Component: condensed chromosome (GO:0000793);; Molecular Function: lipopolysaccharide binding (GO:0001530);; Biological Process: eye development (GO:0001654);; Biological Process: myeloid dendritic cell activation (GO:…	K10802|2.97334e-98|cge:103159970|K10802 high mobility group protein B1 | (RefSeq) high mobility group protein B1	Base excision repair (ko03410)	ko03410:Base excision repair	[R]	General function prediction only	HMG (high mobility group) box;; HMG-box domain	High mobility group protein B1 OS=Homo sapiens OX=9606 GN=HMGB1 PE=1 SV=3	B	Chromatin structure and dynamics	high-mobility group box 1, isoform CRA_b [Homo sapiens]
13	63100000	114364328	loss	ENSG00000285566	--	--	--	--	--	--	--	--	Keratin-associated matrix	--	--	--	--
13	18450000	63050000	loss	ENSG00000136146	--	--	--	K15146|2.24255e-154|cjc:100399365|K15146 mediator of RNA polymerase II transcription subunit 4 | (RefSeq) MED4; mediator complex subunit 4	Thyroid hormone signaling pathway (ko04919)	ko04919:Thyroid hormone signaling pathway	[K]	Transcription	Vitamin-D-receptor interacting Mediator subunit 4	Mediator of RNA polymerase II transcription subunit 4 OS=Homo sapiens OX=9606 GN=MED4 PE=1 SV=1	K	Transcription	PREDICTED: mediator of RNA polymerase II transcription subunit 4 [Callithrix jacchus]
13	63100000	114364328	loss	ENSG00000083535	--	--	--	K16538|0|hsa:10464|K16538 progesterone-induced-blocking factor 1 | (RefSeq) PIBF1, C13orf24, CEP90, PIBF; progesterone immunomodulatory binding factor 1	--		--	--	--	Progesterone-induced-blocking factor 1 OS=Homo sapiens OX=9606 GN=PIBF1 PE=1 SV=2	S	Function unknown	progesterone-induced-blocking factor 1 isoform 2 [Homo sapiens]
13	18450000	63050000	loss	ENSG00000139675	[J]	Translation, ribosomal structure and biogenesis	--	--	--	--	[R]	General function prediction only	RNA recognition motif. (a.k.a. RRM, RBD, or RNP domain);; Nuclear factor hnRNPA1;; RNA recognition motif	Heterogeneous nuclear ribonucleoprotein A1-like 2 OS=Homo sapiens OX=9606 GN=HNRNPA1L2 PE=2 SV=2	S	Function unknown	heterogeneous nuclear ribonucleoprotein A1-like 2 [Homo sapiens]
13	18450000	63050000	loss	ENSG00000123200	--	--	--	--	--	--	[K]	Transcription	Zinc finger C-x8-C-x5-C-x3-H type (and similar)	Zinc finger CCCH domain-containing protein 13 OS=Homo sapiens OX=9606 GN=ZC3H13 PE=1 SV=1	S	Function unknown	zinc finger CCCH domain-containing protein 13 isoform 2 [Homo sapiens]
13	18450000	63050000	loss	ENSG00000139517	--	--	--	K10692|0|hsa:222484|K10692 ligand of Numb protein X 1/2 [EC:2.3.2.27] | (RefSeq) LNX2, PDZRN1; ligand of numb-protein X 2	--		[S]	Function unknown	PDZ domain (Also known as DHR or GLGF);; PDZ domain;; Zinc finger, C3HC4 type (RING finger);; Zinc finger, C3HC4 type (RING finger);; RING-type zinc-finger;; Ring finger domain;; Zinc finger, C3HC4 type (RING finger)	Ligand of Numb protein X 2 OS=Homo sapiens OX=9606 GN=LNX2 PE=1 SV=1	O	Posttranslational modification, protein turnover, chaperones	ligand of Numb protein X 2 [Homo sapiens]
13	63100000	114364328	loss	ENSG00000136155	--	--	--	--	--	--	[TZR]	--	--	Sciellin OS=Homo sapiens OX=9606 GN=SCEL PE=1 SV=2	S	Function unknown	sciellin isoform 3 [Homo sapiens]
13	18450000	63050000	loss	ENSG00000150510	--	--	Molecular Function: protein binding (GO:0005515);;	--	--	--	--	--	FAM124 family	Protein FAM124A OS=Homo sapiens OX=9606 GN=FAM124A PE=1 SV=1	S	Function unknown	PREDICTED: protein FAM124A [Gorilla gorilla gorilla]
13	18450000	63050000	loss	ENSG00000136159	[F]	Nucleotide transport and metabolism	--	K03574|4.01415e-98|ptr:741013|K03574 8-oxo-dGTP diphosphatase [EC:3.6.1.55] | (RefSeq) NUDT15; nudix hydrolase 15	--		--	--	NUDIX domain	Nucleotide triphosphate diphosphatase NUDT15 OS=Homo sapiens OX=9606 GN=NUDT15 PE=1 SV=1	F	Nucleotide transport and metabolism	nucleotide triphosphate diphosphatase NUDT15 isoform 1 [Homo sapiens]
13	18450000	63050000	loss	ENSG00000198553	--	--	Molecular Function: ubiquitin-protein transferase activity (GO:0004842);; Molecular Function: signal transducer activity (GO:0004871);; Cellular Component: endoplasmic reticulum membrane (GO:0005789);; Molecular Function: zinc ion binding (GO:0008270);; Biological Process: anatomical structure morphogenesis (GO:0009653);; Biological Process: response to gamma radiation (GO:0010332);; Biological P…	--	--	--	[R]	General function prediction only	BTB/POZ domain	Potassium channel regulatory protein OS=Homo sapiens OX=9606 GN=KCNRG PE=1 SV=1	S	Function unknown	potassium channel regulatory protein isoform 2 [Homo sapiens]
13	63100000	114364328	loss	ENSG00000184564	[K]	Transcription	Biological Process: startle response (GO:0001964);; Biological Process: lens development in camera-type eye (GO:0002088);; Biological Process: auditory receptor cell morphogenesis (GO:0002093);; Cellular Component: integral component of plasma membrane (GO:0005887);; Biological Process: axonogenesis (GO:0007409);; Biological Process: visual perception (GO:0007601);; Biological Process: sensory pe…	--	--	--	--	--	Leucine rich repeat;; Leucine Rich repeats (2 copies);; Leucine rich repeats (6 copies);; Leucine Rich Repeat	SLIT and NTRK-like protein 6 OS=Homo sapiens OX=9606 GN=SLITRK6 PE=2 SV=3	S	Function unknown	SLIT and NTRK-like protein 6 precursor [Homo sapiens]
13	63100000	114364328	loss	ENSG00000270181	[L]	Replication, recombination and repair	Molecular Function: bubble DNA binding (GO:0000405);; Molecular Function: double-stranded DNA binding (GO:0003690);; Molecular Function: single-stranded DNA binding (GO:0003697);; Molecular Function: endodeoxyribonuclease activity (GO:0004520);; Cellular Component: DNA replication factor A complex (GO:0005662);; Cellular Component: holo TFIIH complex (GO:0005675);; Biological Process: transcripti…	K10846|0|hsa:100533467|K10846 DNA excision repair protein ERCC-5 | (RefSeq) BIVM-ERCC5, ERCC5-202; BIVM-ERCC5 readthrough	Nucleotide excision repair (ko03420)	ko03420:Nucleotide excision repair	[L]	Replication, recombination and repair	XPG I-region;; XPG N-terminal domain	DNA repair protein complementing XP-G cells OS=Homo sapiens OX=9606 GN=ERCC5 PE=1 SV=3	L	Replication, recombination and repair	ERCC5-202 [Homo sapiens]
13	18450000	63050000	loss	ENSG00000139656	--	--	--	--	--	--	--	--	--	Small integral membrane protein 2 OS=Homo sapiens OX=9606 GN=SMIM2 PE=1 SV=1	S	Function unknown	PREDICTED: small integral membrane protein 2 isoform X2 [Chlorocebus sabaeus]
13	63100000	114364328	loss	ENSG00000139826	[T]	Signal transduction mechanisms	--	K06889|0|rro:104679249|K06889 uncharacterized protein | (RefSeq) ABHD13; abhydrolase domain containing 13	--		[R]	General function prediction only	Serine aminopeptidase, S33;; alpha/beta hydrolase fold;; Acetyl xylan esterase (AXE1);; Phospholipase/Carboxylesterase	Protein ABHD13 OS=Homo sapiens OX=9606 GN=ABHD13 PE=2 SV=1	S	Function unknown	protein ABHD13 isoform X1 [Piliocolobus tephrosceles]
13	18450000	63050000	loss	ENSG00000102763	[J]	Translation, ribosomal structure and biogenesis	Molecular Function: ATP binding (GO:0005524);; Cellular Component: extracellular region (GO:0005576);; Cellular Component: mitochondrion (GO:0005739);; Molecular Function: ATPase activity (GO:0016887);;	--	--	--	[R]	General function prediction only	AAA domain (dynein-related subfamily);; AAA domain;; CbbQ/NirQ/NorQ C-terminal;; ATPase family associated with various cellular activities (AAA);; ATPase family associated with various cellular activities (AAA)	von Willebrand factor A domain-containing protein 8 OS=Homo sapiens OX=9606 GN=VWA8 PE=1 SV=2	S	Function unknown	von Willebrand factor A domain-containing protein 8 isoform a precursor [Homo sapiens]
13	18450000	63050000	loss	ENSG00000120696	[M]	Cell wall/membrane/envelope biogenesis	Biological Process: MAPK cascade (GO:0000165);; Molecular Function: ubiquitin-protein transferase activity (GO:0004842);; Molecular Function: protein binding (GO:0005515);; Cellular Component: cytosol (GO:0005829);; Biological Process: protein ubiquitination (GO:0016567);; Cellular Component: Cul3-RING ubiquitin ligase complex (GO:0031463);;	K10474|0|ptr:467268|K10474 kelch repeat and BTB domain-containing protein 6/7 | (RefSeq) KBTBD7; kelch repeat and BTB domain containing 7	--		--	--	BTB/POZ domain;; BTB And C-terminal Kelch;; Kelch motif;; Galactose oxidase, central domain;; Kelch motif;; Galactose oxidase, central domain;; Kelch motif	Kelch repeat and BTB domain-containing protein 7 OS=Homo sapiens OX=9606 GN=KBTBD7 PE=1 SV=1	S	Function unknown	kelch repeat and BTB domain-containing protein 7 [Homo sapiens]
13	63100000	114364328	loss	ENSG00000198542	--	--	Cellular Component: extracellular region (GO:0005576);; Biological Process: cell adhesion (GO:0007155);; Biological Process: integrin-mediated signaling pathway (GO:0007229);;	--	--	--	[TW]	--	EGF-like domain	Integrin beta-like protein 1 OS=Homo sapiens OX=9606 GN=ITGBL1 PE=2 SV=1	U	Intracellular trafficking, secretion, and vesicular transport	LOW QUALITY PROTEIN: ITGBL1 isoform 3 [Pan troglodytes]
13	63100000	114364328	loss	ENSG00000139746	--	--	--	K13192|0|chx:102187238|K13192 RNA-binding protein 26 | (RefSeq) RBM26; RNA binding motif protein 26	--		[R]	General function prediction only	RNA recognition motif. (a.k.a. RRM, RBD, or RNP domain);; PWI domain;; Nup53/35/40-type RNA recognition motif	RNA-binding protein 26 OS=Homo sapiens OX=9606 GN=RBM26 PE=1 SV=3	S	Function unknown	RNA-binding protein 26 isoform X3 [Carlito syrichta]
13	18450000	63050000	loss	ENSG00000133121	--	--	Molecular Function: GTPase activator activity (GO:0005096);; Molecular Function: protein binding (GO:0005515);; Cellular Component: lipid droplet (GO:0005811);; Cellular Component: cytosol (GO:0005829);; Molecular Function: lipid binding (GO:0008289);; Cellular Component: mitochondrial membrane (GO:0031966);; Biological Process: positive regulation of GTPase activity (GO:0043547);; Biological Pro…	K20632|0|hsa:90627|K20632 deleted in liver cancer protein | (RefSeq) STARD13, ARHGAP37, DLC2, GT650, LINC00464; StAR related lipid transfer domain containing 13	--		[T]	Signal transduction mechanisms	START domain;; RhoGAP domain;; SAM domain (Sterile alpha motif)	StAR-related lipid transfer protein 13 OS=Homo sapiens OX=9606 GN=STARD13 PE=1 SV=2	U	Intracellular trafficking, secretion, and vesicular transport	stAR-related lipid transfer protein 13 isoform 1 [Homo sapiens]
13	18450000	63050000	loss	ENSG00000236444	[O]	Posttranslational modification, protein turnover, chaperones	Cellular Component: ubiquitin ligase complex (GO:0000151);; Molecular Function: transcription coactivator activity (GO:0003713);; Molecular Function: ATP binding (GO:0005524);; Cellular Component: nucleus (GO:0005634);; Cellular Component: cytoplasm (GO:0005737);; Biological Process: regulation of transcription, DNA-templated (GO:0006355);; Biological Process: cell proliferation (GO:0008283);; Mo…	K04552|1.8097e-107|chx:102187703|K04552 ubiquitin-conjugating enzyme E2 L3 [EC:2.3.2.23] | (RefSeq) UBE2L3; ubiquitin conjugating enzyme E2 L3	Ubiquitin mediated proteolysis (ko04120);; Parkinson's disease (ko05012)	ko04120:Ubiquitin mediated proteolysis;ko05012:Parkinson's disease	[O]	Posttranslational modification, protein turnover, chaperones	Ubiquitin-conjugating enzyme;; UEV domain;; RWD domain	Ubiquitin-conjugating enzyme E2 L5 OS=Homo sapiens OX=9606 GN=UBE2L5 PE=2 SV=1	O	Posttranslational modification, protein turnover, chaperones	ubiquitin conjugating enzyme E2 L5 [Homo sapiens]
13	18450000	63050000	loss	ENSG00000133106	--	--	Cellular Component: integral component of membrane (GO:0016021);;	--	--	--	--	--	--	Epithelial-stromal interaction protein 1 OS=Homo sapiens OX=9606 GN=EPSTI1 PE=2 SV=2	U	Intracellular trafficking, secretion, and vesicular transport	epithelial-stromal interaction protein 1 isoform 1 [Homo sapiens]
13	18450000	63050000	loss	ENSG00000180730	--	--	Cellular Component: endoplasmic reticulum membrane (GO:0005789);; Biological Process: multicellular organism development (GO:0007275);; Cellular Component: integral component of membrane (GO:0016021);;	--	--	--	--	--	Wnt and FGF inhibitory regulator	Protein shisa-2 homolog OS=Homo sapiens OX=9606 GN=SHISA2 PE=1 SV=1	U	Intracellular trafficking, secretion, and vesicular transport	PREDICTED: protein shisa-2 homolog [Macaca fascicularis]
13	18450000	63050000	loss	ENSG00000120688	--	--	Molecular Function: nucleic acid binding (GO:0003676);; Cellular Component: spliceosomal complex (GO:0005681);; Cellular Component: plasma membrane (GO:0005886);; Molecular Function: zinc ion binding (GO:0008270);; Cellular Component: nuclear speck (GO:0016607);; Biological Process: mRNA cis splicing, via spliceosome (GO:0045292);; Molecular Function: proline-rich region binding (GO:0070064);;	K13220|0|hsa:11193|K13220 WW domain-binding protein 4 | (RefSeq) WBP4, FBP21; WW domain binding protein 4	--		[A]	RNA processing and modification	WW domain;; U1 zinc finger	WW domain-binding protein 4 OS=Homo sapiens OX=9606 GN=WBP4 PE=1 SV=1	S	Function unknown	PREDICTED: WW domain-binding protein 4 isoform X1 [Homo sapiens]
13	18450000	63050000	loss	ENSG00000183463	[F]	Nucleotide transport and metabolism	Cellular Component: peroxisome (GO:0005777);; Biological Process: purine nucleobase metabolic process (GO:0006144);; Molecular Function: carboxy-lyase activity (GO:0016831);; Biological Process: allantoin biosynthetic process (GO:0019428);; Biological Process: urate catabolic process (GO:0019628);;	K13485|5.92749e-108|hsa:646625|K13485 2-oxo-4-hydroxy-4-carboxy-5-ureidoimidazoline decarboxylase [EC:4.1.1.97] | (RefSeq) URAD, PRHOXNB; ureidoimidazoline (2-oxo-4-hydroxy-4-carboxy-5-) decarboxylase	Purine metabolism (ko00230)	ko00230:Purine metabolism	--	--	OHCU decarboxylase	Putative 2-oxo-4-hydroxy-4-carboxy-5-ureidoimidazoline decarboxylase OS=Homo sapiens OX=9606 GN=URAD PE=5 SV=2	S	Function unknown	putative 2-oxo-4-hydroxy-4-carboxy-5-ureidoimidazoline decarboxylase [Homo sapiens]
13	18450000	63050000	loss	ENSG00000123178	--	--	--	--	--	--	[S]	Function unknown	SPRY domain	SPRY domain-containing protein 7 OS=Homo sapiens OX=9606 GN=SPRYD7 PE=1 SV=2	S	Function unknown	PREDICTED: SPRY domain-containing protein 7 isoform X2 [Chlorocebus sabaeus]
13	63100000	114364328	loss	ENSG00000102554	[R]	General function prediction only	Biological Process: negative regulation of transcription from RNA polymerase II promoter (GO:0000122);; Molecular Function: RNA polymerase II core promoter proximal region sequence-specific DNA binding (GO:0000978);; Molecular Function: transcriptional activator activity, RNA polymerase II core promoter proximal region sequence-specific binding (GO:0001077);; Biological Process: angiogenesis (GO:…	K09206|0|hsa:688|K09206 krueppel-like factor 5 | (RefSeq) KLF5, BTEB2, CKLF, IKLF; Kruppel like factor 5	--		[R]	General function prediction only	Zinc finger, C2H2 type;; Zinc-finger double domain;; C2H2-type zinc finger;; Zinc-finger of C2H2 type	Krueppel-like factor 5 OS=Homo sapiens OX=9606 GN=KLF5 PE=1 SV=2	S	Function unknown	Krueppel-like factor 5 isoform 1 [Homo sapiens]
13	63100000	114364328	loss	ENSG00000169508	--	--	--	K04305|0|hsa:1880|K04305 Epstein-Barr virus induced gene 2 | (RefSeq) GPR183, EBI2, hEBI2; G protein-coupled receptor 183	--		--	--	7 transmembrane receptor (rhodopsin family);; Serpentine type 7TM GPCR chemoreceptor Srx	G-protein coupled receptor 183 OS=Homo sapiens OX=9606 GN=GPR183 PE=1 SV=3	U	Intracellular trafficking, secretion, and vesicular transport	G-protein coupled receptor 183 [Homo sapiens]
13	18450000	63050000	loss	ENSG00000073910	--	--	Biological Process: cell morphogenesis (GO:0000902);; Cellular Component: spindle pole (GO:0000922);; Molecular Function: enzyme inhibitor activity (GO:0004857);; Cellular Component: microtubule organizing center (GO:0005815);; Cellular Component: cell cortex (GO:0005938);; Cellular Component: site of polarized growth (GO:0030427);; Biological Process: neuron projection development (GO:0031175);;…	--	--	--	[R]	General function prediction only	Cell morphogenesis N-terminal;; Cell morphogenesis C-terminal;; Cell morphogenesis central region	Protein furry homolog OS=Homo sapiens OX=9606 GN=FRY PE=1 SV=1	S	Function unknown	protein furry homolog [Homo sapiens]
13	63100000	114364328	loss	ENSG00000136153	--	--	--	K06084|0|hsa:4008|K06084 F-box protein 20 | (RefSeq) LMO7, FBX20, FBXO20, LOMP; LIM domain 7	Adherens junction (ko04520)	ko04520:Adherens junction	--	--	Domain of unknown function (DUF4757);; Calponin homology (CH) domain;; PDZ domain (Also known as DHR or GLGF);; LIM domain;; PDZ domain	LIM domain only protein 7 OS=Homo sapiens OX=9606 GN=LMO7 PE=1 SV=3	Z	Cytoskeleton	RecName: Full=LIM domain only protein 7; Short=LMO-7; AltName: Full=F-box only protein 20; AltName: Full=LOMP
13	63100000	114364328	loss	ENSG00000139780	[J]	Translation, ribosomal structure and biogenesis	--	--	--	--	[A]	RNA processing and modification	Lysine methyltransferase;; Methyltransferase domain	Protein-lysine methyltransferase METTL21C OS=Homo sapiens OX=9606 GN=METTL21C PE=1 SV=1	Q	Secondary metabolites biosynthesis, transport and catabolism	OTTHUMP00000018663, isoform CRA_a [Homo sapiens]
13	18450000	63050000	loss	ENSG00000127870	--	--	--	--	--	--	[O]	Posttranslational modification, protein turnover, chaperones	Ring finger domain;; RING-H2 zinc finger domain;; RING-like zinc finger;; Zinc finger, C3HC4 type (RING finger);; Anaphase-promoting complex subunit 11 RING-H2 finger	E3 ubiquitin-protein ligase RNF6 OS=Homo sapiens OX=9606 GN=RNF6 PE=1 SV=1	O	Posttranslational modification, protein turnover, chaperones	E3 ubiquitin-protein ligase RNF6 isoform 1 [Homo sapiens]
13	18450000	63050000	loss	ENSG00000133110	[R]	General function prediction only	Biological Process: skeletal system development (GO:0001501);; Biological Process: response to hypoxia (GO:0001666);; Biological Process: negative regulation of cell-matrix adhesion (GO:0001953);; Biological Process: regulation of systemic arterial blood pressure (GO:0003073);; Cellular Component: proteinaceous extracellular matrix (GO:0005578);; Cellular Component: extracellular space (GO:000561…	--	--	--	[MW]	--	Fasciclin domain	Periostin OS=Homo sapiens OX=9606 GN=POSTN PE=1 SV=2	M	Cell wall/membrane/envelope biogenesis	PREDICTED: periostin isoform X5 [Gorilla gorilla gorilla]
13	18450000	63050000	loss	ENSG00000152213	[R]	General function prediction only	--	K07959|2.55984e-127|hsa:115761|K07959 ADP-ribosylation factor-like protein 11 | (RefSeq) ARL11, ARLTS1; ADP ribosylation factor like GTPase 11	--		[U]	Intracellular trafficking, secretion, and vesicular transport	ADP-ribosylation factor family;; Signal recognition particle receptor beta subunit;; Ras of Complex, Roc, domain of DAPkinase;; Ras family;; Gtr1/RagA G protein conserved region;; 50S ribosome-binding GTPase	ADP-ribosylation factor-like protein 11 OS=Homo sapiens OX=9606 GN=ARL11 PE=1 SV=1	S	Function unknown	ADP-ribosylation factor-like protein 11 [Homo sapiens]
13	18450000	63050000	loss	ENSG00000139687	--	--	--	K06618|0|pps:100973837|K06618 retinoblastoma-associated protein | (RefSeq) RB1; RB transcriptional corepressor 1	Pancreatic cancer (ko05212);; Hepatitis B (ko05161);; Viral carcinogenesis (ko05203);; Epstein-Barr virus infection (ko05169);; Cell cycle (ko04110);; Prostate cancer (ko05215);; Small cell lung cancer (ko05222);; Chronic myeloid leukemia (ko05220);; Non-small cell lung cancer (ko05223);; Glioma (ko05214);; HTLV-I infection (ko05166);; Pathways in cancer (ko05200);; Melanoma (ko05218);; Bladder c…	ko05219:Bladder cancer;ko05222:Small cell lung cancer;ko05212:Pancreatic cancer;ko05203:Viral carcinogenesis;ko05200:Pathways in cancer;ko05220:Chronic myeloid leukemia;ko05169:Epstein-Barr virus infection;ko04110:Cell cycle;ko05223:Non-small cell lung cancer;ko05218:Melanoma;ko01522:Endocrine resistance;ko05161:Hepatitis B;ko05215:Prostate cancer;ko05214:Glioma;ko05166:HTLV-I infection	[D]	Cell cycle control, cell division, chromosome partitioning	Rb C-terminal domain;; Retinoblastoma-associated protein A domain;; Retinoblastoma-associated protein B domain;; Domain of unknown function (DUF3452)	Retinoblastoma-associated protein OS=Homo sapiens OX=9606 GN=RB1 PE=1 SV=2	K	Transcription	Retinoblastoma-associated protein variant, partial [Homo sapiens]
13	18450000	63050000	loss	ENSG00000165556	--	--	--	K09312|4.60105e-116|pps:100978486|K09312 homeobox protein CDX | (RefSeq) CDX2; caudal type homeobox 2	--		[K]	Transcription	Caudal like protein activation region;; Homeobox domain	Homeobox protein CDX-2 OS=Homo sapiens OX=9606 GN=CDX2 PE=1 SV=3	K	Transcription	homeobox protein CDX-2 isoform 1 [Homo sapiens]
13	18450000	63050000	loss	ENSG00000136161	[DZ]	Cell cycle control, cell division, chromosome partitioning ;; Cytoskeleton	--	K11494|0|pps:100975292|K11494 RCC1 and BTB domain-containing protein | (RefSeq) RCBTB2; RCC1 and BTB domain containing protein 2	--		[S]	Function unknown	Regulator of chromosome condensation (RCC1) repeat;; Regulator of chromosome condensation (RCC1) repeat;; BTB/POZ domain;; BTB And C-terminal Kelch	RCC1 and BTB domain-containing protein 2 OS=Homo sapiens OX=9606 GN=RCBTB2 PE=1 SV=1	DZ	--	RCC1 and BTB domain-containing protein 2 isoform 2 [Homo sapiens]
13	63100000	114364328	loss	ENSG00000152192	--	--	--	K09366|0|hsa:5457|K09366 POU domain transcription factor, class 4 | (RefSeq) POU4F1, BRN3A, Oct-T1, RDC-1, brn-3A; POU class 4 homeobox 1	--		[K]	Transcription	Pou domain - N-terminal to homeobox domain;; Homeobox domain	POU domain, class 4, transcription factor 1 OS=Homo sapiens OX=9606 GN=POU4F1 PE=2 SV=4	K	Transcription	POU domain, class 4, transcription factor 1 [Homo sapiens]
13	18450000	63050000	loss	ENSG00000132970	--	--	Molecular Function: actin binding (GO:0003779);; Cellular Component: cytoplasm (GO:0005737);; Cellular Component: cytoskeleton (GO:0005856);; Biological Process: regulation of cell shape (GO:0008360);; Biological Process: oligodendrocyte development (GO:0014003);; Cellular Component: lamellipodium (GO:0030027);; Biological Process: lamellipodium assembly (GO:0030032);; Biological Process: actin f…	K06083|0|mcf:102131834|K06083 WAS protein family, member 3 | (RefSeq) WASF3; WAS protein family member 3	Choline metabolism in cancer (ko05231);; Fc gamma R-mediated phagocytosis (ko04666);; Adherens junction (ko04520)	ko05231:Choline metabolism in cancer;ko04666:Fc gamma R-mediated phagocytosis;ko04520:Adherens junction	[Z]	Cytoskeleton	WH2 motif	Wiskott-Aldrich syndrome protein family member 3 OS=Homo sapiens OX=9606 GN=WASF3 PE=1 SV=2	S	Function unknown	PREDICTED: wiskott-Aldrich syndrome protein family member 3 isoform X2 [Gorilla gorilla gorilla]
13	18450000	63050000	loss	ENSG00000172766	[R]	General function prediction only	Molecular Function: peptide alpha-N-acetyltransferase activity (GO:0004596);; Molecular Function: protein binding (GO:0005515);; Cellular Component: nucleus (GO:0005634);; Cellular Component: transcription factor complex (GO:0005667);; Biological Process: N-terminal peptidyl-methionine acetylation (GO:0017196);; Cellular Component: NatA complex (GO:0031415);; Molecular Function: ribosome binding …	K20792|0|hsa:79612|K20792 N-alpha-acetyltransferase 15/16, NatA auxiliary subunit | (RefSeq) NAA16, NARG1L; N(alpha)-acetyltransferase 16, NatA auxiliary subunit	--		[B]	Chromatin structure and dynamics	NMDA receptor-regulated protein 1;; Tetratricopeptide repeat;; Tetratricopeptide repeat;; Tetratricopeptide repeat;; Tetratricopeptide repeat;; Tetratricopeptide repeat;; TPR repeat;; Tetratricopeptide repeat;; Anaphase-promoting complex, cyclosome, subunit 3;; Tetratricopeptide repeat	N-alpha-acetyltransferase 16, NatA auxiliary subunit OS=Homo sapiens OX=9606 GN=NAA16 PE=1 SV=2	S	Function unknown	N-alpha-acetyltransferase 16, NatA auxiliary subunit isoform 1 [Homo sapiens]
13	18450000	63050000	loss	ENSG00000133101	--	--	Biological Process: regulation of transcription involved in G1/S transition of mitotic cell cycle (GO:0000083);; Molecular Function: protein binding (GO:0005515);; Cellular Component: nucleoplasm (GO:0005654);; Cellular Component: cytosol (GO:0005829);; Biological Process: mitotic cell cycle (GO:0007067);; Biological Process: male meiosis I (GO:0007141);; Biological Process: spermatogenesis (GO:0…	K06627|0|hsa:8900|K06627 cyclin A | (RefSeq) CCNA1, CT146; cyclin A1	Pathways in cancer (ko05200);; Acute myeloid leukemia (ko05221);; AMPK signaling pathway (ko04152);; Cell cycle (ko04110);; Progesterone-mediated oocyte maturation (ko04914);; Epstein-Barr virus infection (ko05169);; Viral carcinogenesis (ko05203);; Transcriptional misregulation in cancer (ko05202);; Hepatitis B (ko05161)	ko05161:Hepatitis B;ko05202:Transcriptional misregulation in cancer;ko04152:AMPK signaling pathway;ko04110:Cell cycle;ko05169:Epstein-Barr virus infection;ko05221:Acute myeloid leukemia;ko05203:Viral carcinogenesis;ko05200:Pathways in cancer;ko04914:Progesterone-mediated oocyte maturation	[D]	Cell cycle control, cell division, chromosome partitioning	Cyclin, N-terminal domain;; Cyclin, C-terminal domain	Cyclin-A1 OS=Homo sapiens OX=9606 GN=CCNA1 PE=1 SV=1	D	Cell cycle control, cell division, chromosome partitioning	cyclin-A1 isoform a [Homo sapiens]
13	18450000	63050000	loss	ENSG00000174032	--	--	Molecular Function: structural constituent of ribosome (GO:0003735);; Cellular Component: mitochondrial inner membrane (GO:0005743);; Biological Process: translation (GO:0006412);; Biological Process: mitochondrial transport (GO:0006839);; Cellular Component: integral component of membrane (GO:0016021);;	K15106|0|hsa:253512|K15106 solute carrier family 25 (mitochondrial carrier), member 14/30 | (RefSeq) SLC25A30, KMCP1; solute carrier family 25 member 30	--		[C]	Energy production and conversion	Mitochondrial carrier protein	Kidney mitochondrial carrier protein 1 OS=Homo sapiens OX=9606 GN=SLC25A30 PE=1 SV=1	O	Posttranslational modification, protein turnover, chaperones	PREDICTED: kidney mitochondrial carrier protein 1 isoform X1 [Cercocebus atys]
13	63100000	114364328	loss	ENSG00000134899	[L]	Replication, recombination and repair	Molecular Function: bubble DNA binding (GO:0000405);; Molecular Function: double-stranded DNA binding (GO:0003690);; Molecular Function: single-stranded DNA binding (GO:0003697);; Molecular Function: endodeoxyribonuclease activity (GO:0004520);; Cellular Component: DNA replication factor A complex (GO:0005662);; Cellular Component: holo TFIIH complex (GO:0005675);; Biological Process: transcripti…	K10846|0|hsa:100533467|K10846 DNA excision repair protein ERCC-5 | (RefSeq) BIVM-ERCC5, ERCC5-202; BIVM-ERCC5 readthrough	Nucleotide excision repair (ko03420)	ko03420:Nucleotide excision repair	[L]	Replication, recombination and repair	XPG I-region;; XPG N-terminal domain	DNA repair protein complementing XP-G cells OS=Homo sapiens OX=9606 GN=ERCC5 PE=1 SV=3	L	Replication, recombination and repair	ERCC5-202 [Homo sapiens]
13	18450000	63050000	loss	ENSG00000285444	[C]	Energy production and conversion	Molecular Function: transcription factor activity, sequence-specific DNA binding (GO:0003700);; Biological Process: regulation of transcription, DNA-templated (GO:0006355);; Molecular Function: oxidoreductase activity (GO:0016491);; Biological Process: oxidation-reduction process (GO:0055114);;	K11168|2.08949e-146|hsa:79758|K11168 dehydrogenase/reductase SDR family member 12 [EC:1.1.-.-] | (RefSeq) DHRS12, SDR40C1; dehydrogenase/reductase 12	--		[Q]	Secondary metabolites biosynthesis, transport and catabolism	--	Dehydrogenase/reductase SDR family member 12 OS=Homo sapiens OX=9606 GN=DHRS12 PE=2 SV=2	S	Function unknown	DHRS12 protein, partial [Homo sapiens]
14	105700000	106250000	loss	ENSG00000211898	--	--	Molecular Function: antigen binding (GO:0003823);; Molecular Function: serine-type endopeptidase activity (GO:0004252);; Biological Process: proteolysis (GO:0006508);; Biological Process: receptor-mediated endocytosis (GO:0006898);; Biological Process: phagocytosis, recognition (GO:0006910);; Biological Process: phagocytosis, engulfment (GO:0006911);; Biological Process: complement activation, cl…	--	--	--	--	--	Immunoglobulin C1-set domain;; Immunoglobulin domain;; Immunoglobulin domain;; CD80-like C2-set immunoglobulin domain	Immunoglobulin delta heavy chain OS=Homo sapiens OX=9606 PE=1 SV=1	S	Function unknown	IGHD isoform 2, partial [Pan troglodytes]
X	30050000	39050000	loss	ENSG00000189132	--	--	--	--	--	--	--	--	FAM47 family	Protein FAM47B OS=Homo sapiens OX=9606 GN=FAM47B PE=2 SV=2	S	Function unknown	protein FAM47B [Homo sapiens]
X	3950000	29350000	loss	ENSG00000130234	[E]	Amino acid transport and metabolism	Molecular Function: virus receptor activity (GO:0001618);; Biological Process: regulation of cytokine production (GO:0001817);; Molecular Function: protein binding (GO:0001948);; Biological Process: angiotensin maturation (GO:0002003);; Biological Process: angiotensin catabolic process in blood (GO:0002005);; Biological Process: angiotensin-mediated drinking behavior (GO:0003051);; Molecular Func…	K09708|0|hsa:59272|K09708 angiotensin-converting enzyme 2 [EC:3.4.17.23] | (RefSeq) ACE2, ACEH; angiotensin I converting enzyme 2	Protein digestion and absorption (ko04974);; Renin-angiotensin system (ko04614)	ko04974:Protein digestion and absorption;ko04614:Renin-angiotensin system	[E]	Amino acid transport and metabolism	Angiotensin-converting enzyme;; Renal amino acid transporter	Angiotensin-converting enzyme 2 OS=Homo sapiens OX=9606 GN=ACE2 PE=1 SV=2	S	Function unknown	angiotensin-converting enzyme 2 precursor [Homo sapiens]
X	3950000	29350000	loss	ENSG00000181544	--	--	Molecular Function: protein binding (GO:0005515);; Biological Process: interstrand cross-link repair (GO:0036297);; Cellular Component: Fanconi anaemia nuclear complex (GO:0043240);;	K10889|0|hsa:2187|K10889 fanconi anemia group B protein | (RefSeq) FANCB, FA2, FAAP90, FAAP95, FAB, FACB; Fanconi anemia complementation group B	Fanconi anemia pathway (ko03460)	ko03460:Fanconi anemia pathway	--	--	--	Fanconi anemia group B protein OS=Homo sapiens OX=9606 GN=FANCB PE=1 SV=1	S	Function unknown	Fanconi anemia group B protein [Homo sapiens]
X	30050000	39050000	loss	ENSG00000165164	--	--	--	--	--	--	--	--	Transmembrane protein 131-like;; Abnormal spindle-like microcephaly-assoc'd, ASPM-SPD-2-Hydin;; MSP (Major sperm protein) domain	Cilia- and flagella-associated protein 47 OS=Homo sapiens OX=9606 GN=CFAP47 PE=2 SV=5	S	Function unknown	cilia- and flagella-associated protein 47 isoform 1 [Homo sapiens]
X	41000000	58450000	loss	ENSG00000069535	[E]	Amino acid transport and metabolism	Cellular Component: mitochondrial outer membrane (GO:0005741);; Cellular Component: mitochondrial inner membrane (GO:0005743);; Molecular Function: primary amine oxidase activity (GO:0008131);; Molecular Function: electron carrier activity (GO:0009055);; Biological Process: response to toxic substance (GO:0009636);; Biological Process: response to aluminum ion (GO:0010044);; Biological Process: r…	K00274|0|hsa:4129|K00274 monoamine oxidase [EC:1.4.3.4] | (RefSeq) MAOB; monoamine oxidase B	Arginine and proline metabolism (ko00330);; Histidine metabolism (ko00340);; Dopaminergic synapse (ko04728);; Glycine, serine and threonine metabolism (ko00260);; Tryptophan metabolism (ko00380);; Tyrosine metabolism (ko00350);; Amphetamine addiction (ko05031);; Drug metabolism - cytochrome P450 (ko00982);; Alcoholism (ko05034);; Serotonergic synapse (ko04726);; Cocaine addiction (ko05030);; Phen…	ko00340:Histidine metabolism;ko00350:Tyrosine metabolism;ko05034:Alcoholism;ko00380:Tryptophan metabolism;ko04726:Serotonergic synapse;ko00260:Glycine, serine and threonine metabolism;ko00360:Phenylalanine metabolism;ko00982:Drug metabolism - cytochrome P450;ko05031:Amphetamine addiction;ko00330:Arginine and proline metabolism;ko05030:Cocaine addiction;ko04728:Dopaminergic synapse	[Q]	Secondary metabolites biosynthesis, transport and catabolism	Flavin containing amine oxidoreductase;; NAD(P)-binding Rossmann-like domain;; FAD dependent oxidoreductase;; FAD dependent oxidoreductase;; FAD binding domain;; FAD binding domain;; Pyridine nucleotide-disulphide oxidoreductase	Amine oxidase [flavin-containing] B OS=Homo sapiens OX=9606 GN=MAOB PE=1 SV=3	S	Function unknown	amine oxidase [flavin-containing] B [Homo sapiens]
X	30050000	39050000	loss	ENSG00000120289	--	--	--	--	--	--	[S]	Function unknown	Melanoma associated antigen family N terminal;; MAGE family	Melanoma-associated antigen B4 OS=Homo sapiens OX=9606 GN=MAGEB4 PE=1 SV=1	S	Function unknown	melanoma-associated antigen B4 [Homo sapiens]
X	30050000	39050000	loss	ENSG00000250349	--	--	Molecular Function: calcium ion binding (GO:0005509);; Cellular Component: extracellular region (GO:0005576);; Cellular Component: integral component of plasma membrane (GO:0005887);; Biological Process: cell surface receptor signaling pathway (GO:0007166);; Biological Process: viral process (GO:0016032);;	K06571|1.51646e-162|hsa:7102|K06571 tetraspanin-7 | (RefSeq) TSPAN7, A15, CCG-B7, CD231, DXS1692E, MRX58, MXS1, TALLA-1, TM4SF2, TM4SF2b; tetraspanin 7	Transcriptional misregulation in cancer (ko05202)	ko05202:Transcriptional misregulation in cancer	[R]	General function prediction only	Tetraspanin family;; Vitamin K-dependent carboxylation/gamma-carboxyglutamic (GLA) domain	Tetraspanin-7 OS=Homo sapiens OX=9606 GN=TSPAN7 PE=1 SV=2	S	Function unknown	unnamed protein product [Homo sapiens]
X	3950000	29350000	loss	ENSG00000005889	--	--	Molecular Function: RNA polymerase II regulatory region sequence-specific DNA binding (GO:0000977);; Molecular Function: transcription factor activity, sequence-specific DNA binding (GO:0003700);; Molecular Function: transcription coactivator activity (GO:0003713);; Cellular Component: nucleus (GO:0005634);; Biological Process: regulation of transcription, DNA-templated (GO:0006355);; Biological …	--	--	--	[R]	General function prediction only	Zfx / Zfy transcription activation region;; Zinc finger, C2H2 type;; Zinc-finger double domain;; C2H2-type zinc finger;; C2H2-type zinc-finger domain;; Zinc-finger double-stranded RNA-binding;; zinc-ribbon family	Zinc finger X-chromosomal protein OS=Homo sapiens OX=9606 GN=ZFX PE=2 SV=2	S	Function unknown	zinc finger protein [Homo sapiens]
X	3950000	29350000	loss	ENSG00000011201	--	--	--	--	--	--	[W]	Extracellular structures	Fibronectin type III domain;; WAP-type (Whey Acidic Protein) 'four-disulfide core'	Anosmin-1 OS=Homo sapiens OX=9606 GN=ANOS1 PE=1 SV=3	S	Function unknown	Kallmann syndrome 1 sequence [Homo sapiens]
X	30050000	39050000	loss	ENSG00000165175	--	--	--	--	--	--	--	--	Thyroid hormone-inducible hepatic protein Spot 14	Mid1-interacting protein 1 OS=Homo sapiens OX=9606 GN=MID1IP1 PE=1 SV=1	O	Posttranslational modification, protein turnover, chaperones	mid1-interacting protein 1 [Homo sapiens]
X	30050000	39050000	loss	ENSG00000187516	--	--	Cellular Component: nuclear chromatin (GO:0000790);; Molecular Function: DNA binding (GO:0003677);; Biological Process: chromatin silencing (GO:0006342);; Molecular Function: protein heterodimerization activity (GO:0046982);;	--	--	--	--	--	--	Huntingtin-interacting protein M OS=Homo sapiens OX=9606 GN=HYPM PE=1 SV=2	S	Function unknown	huntingtin interacting protein HYPM, partial [Homo sapiens]
X	3950000	29350000	loss	ENSG00000126010	--	--	--	K04169|0|hsa:2925|K04169 gastrin-releasing peptide receptor | (RefSeq) GRPR, BB2, BB2R; gastrin releasing peptide receptor	Calcium signaling pathway (ko04020);; Neuroactive ligand-receptor interaction (ko04080)	ko04020:Calcium signaling pathway;ko04080:Neuroactive ligand-receptor interaction	[R]	General function prediction only	7 transmembrane receptor (rhodopsin family);; Serpentine type 7TM GPCR chemoreceptor Srv;; Serpentine type 7TM GPCR chemoreceptor Srsx	Gastrin-releasing peptide receptor OS=Homo sapiens OX=9606 GN=GRPR PE=2 SV=1	U	Intracellular trafficking, secretion, and vesicular transport	gastrin-releasing peptide receptor [Homo sapiens]
X	30050000	39050000	loss	ENSG00000157625	--	--	--	K12793|0|ptr:473550|K12793 TAK1-binding protein 3 | (RefSeq) TAB3; TGF-beta activated kinase 1/MAP3K7 binding protein 3	NOD-like receptor signaling pathway (ko04621);; NF-kappa B signaling pathway (ko04064);; TNF signaling pathway (ko04668)	ko04668:TNF signaling pathway;ko04064:NF-kappa B signaling pathway;ko04621:NOD-like receptor signaling pathway	--	--	CUE domain	TGF-beta-activated kinase 1 and MAP3K7-binding protein 3 OS=Homo sapiens OX=9606 GN=TAB3 PE=1 SV=3	U	Intracellular trafficking, secretion, and vesicular transport	TAK1-binding protein 3, isoform CRA_c [Homo sapiens]
X	3950000	29350000	loss	ENSG00000182798	--	--	--	--	--	--	[S]	Function unknown	Melanoma associated antigen family N terminal;; MAGE family	Melanoma-associated antigen B17 OS=Homo sapiens OX=9606 GN=MAGEB17 PE=4 SV=3	S	Function unknown	PREDICTED: melanoma-associated antigen B17 [Mandrillus leucophaeus]
X	3950000	29350000	loss	ENSG00000047634	--	--	Molecular Function: DNA binding (GO:0003677);; Molecular Function: transcription factor activity, sequence-specific DNA binding (GO:0003700);; Cellular Component: nucleus (GO:0005634);; Biological Process: regulation of transcription, DNA-templated (GO:0006355);; Biological Process: anatomical structure morphogenesis (GO:0009653);;	K11464|0|hsa:6322|K11464 sex comb on midleg-like protein 1 | (RefSeq) SCML1; sex comb on midleg-like 1 (Drosophila)	--		[K]	Transcription	SAM domain (Sterile alpha motif);; SAM domain (Sterile alpha motif)	Sex comb on midleg-like protein 1 OS=Homo sapiens OX=9606 GN=SCML1 PE=1 SV=2	S	Function unknown	sex comb on midleg-like protein 1 isoform b [Homo sapiens]
X	2800000	3850000	loss	ENSG00000157399	[P]	Inorganic ion transport and metabolism	--	K18222|0|hsa:415|K18222 arylsulfatase E [EC:3.1.6.-] | (RefSeq) ARSE, ASE, CDPX, CDPX1, CDPXR; arylsulfatase E (chondrodysplasia punctata 1)	--		[R]	General function prediction only	Sulfatase;; C-terminal region of aryl-sulfatase;; Type I phosphodiesterase / nucleotide pyrophosphatase	Arylsulfatase E OS=Homo sapiens OX=9606 GN=ARSE PE=1 SV=2	P	Inorganic ion transport and metabolism	arylsulfatase E isoform 1 [Homo sapiens]
X	3950000	29350000	loss	ENSG00000131828	[C]	Energy production and conversion	--	K00161|0|rro:104682411|K00161 pyruvate dehydrogenase E1 component alpha subunit [EC:1.2.4.1] | (RefSeq) PDHA1; pyruvate dehydrogenase (lipoamide) alpha 1	Citrate cycle (TCA cycle) (ko00020);; Central carbon metabolism in cancer (ko05230);; HIF-1 signaling pathway (ko04066);; Glycolysis / Gluconeogenesis (ko00010);; Glucagon signaling pathway (ko04922);; Pyruvate metabolism (ko00620);; Carbon metabolism (ko01200)	ko00010:Glycolysis / Gluconeogenesis;ko00020:Citrate cycle (TCA cycle);ko04922:Glucagon signaling pathway;ko01200:Carbon metabolism;ko05230:Central carbon metabolism in cancer;ko04066:HIF-1 signaling pathway;ko00620:Pyruvate metabolism	[C]	Energy production and conversion	Dehydrogenase E1 component	Pyruvate dehydrogenase E1 component subunit alpha, somatic form, mitochondrial OS=Homo sapiens OX=9606 GN=PDHA1 PE=1 SV=3	C	Energy production and conversion	PREDICTED: pyruvate dehydrogenase E1 component subunit alpha, somatic form, mitochondrial isoform X2 [Chlorocebus sabaeus]
X	2800000	3850000	loss	ENSG00000006756	[P]	Inorganic ion transport and metabolism	--	K12374|0|hsa:414|K12374 arylsulfatase D/F/H [EC:3.1.6.-] | (RefSeq) ARSD, ASD; arylsulfatase D	--		[R]	General function prediction only	Sulfatase;; C-terminal region of aryl-sulfatase;; Type I phosphodiesterase / nucleotide pyrophosphatase	Arylsulfatase D OS=Homo sapiens OX=9606 GN=ARSD PE=1 SV=2	P	Inorganic ion transport and metabolism	PREDICTED: arylsulfatase D isoform X1 [Pan troglodytes]
X	3950000	29350000	loss	ENSG00000177324	--	--	Biological Process: skeletal muscle fiber development (GO:0048741);;	--	--	--	--	--	BEN domain	BEN domain-containing protein 2 OS=Homo sapiens OX=9606 GN=BEND2 PE=2 SV=2	S	Function unknown	BEN domain-containing protein 2 isoform 1 [Homo sapiens]
X	29400000	30000000	loss	ENSG00000169306	--	--	--	K05170|0|cjc:100399196|K05170 interleukin 1 receptor accessory protein-like | (RefSeq) IL1RAPL1; interleukin 1 receptor accessory protein like 1	--		--	--	TIR domain;; Immunoglobulin domain;; Immunoglobulin domain;; Immunoglobulin I-set domain;; Immunoglobulin domain;; Immunoglobulin V-set domain	Interleukin-1 receptor accessory protein-like 1 OS=Homo sapiens OX=9606 GN=IL1RAPL1 PE=1 SV=2	U	Intracellular trafficking, secretion, and vesicular transport	interleukin-1 receptor accessory protein-like 1 precursor [Homo sapiens]
X	3950000	29350000	loss	ENSG00000188158	--	--	Biological Process: lens development in camera-type eye (GO:0002088);; Cellular Component: cytoplasm (GO:0005737);; Cellular Component: bicellular tight junction (GO:0005923);; Cellular Component: focal adhesion (GO:0005925);; Cellular Component: apical plasma membrane (GO:0016324);; Cellular Component: lamellipodium (GO:0030027);; Biological Process: cell differentiation (GO:0030154);;	--	--	--	--	--	NHS-like	Nance-Horan syndrome protein OS=Homo sapiens OX=9606 GN=NHS PE=1 SV=2	S	Function unknown	Nance-Horan syndrome protein isoform 2 [Homo sapiens]
X	41000000	58450000	loss	ENSG00000215301	[L]	Replication, recombination and repair	Molecular Function: DNA binding (GO:0003677);; Molecular Function: GTPase activity (GO:0003924);; Molecular Function: ATP-dependent DNA helicase activity (GO:0004003);; Molecular Function: ATP-dependent RNA helicase activity (GO:0004004);; Molecular Function: ATP binding (GO:0005524);; Cellular Component: mitochondrial outer membrane (GO:0005741);; Cellular Component: eukaryotic translation initi…	K11594|0|cfa:480886|K11594 ATP-dependent RNA helicase DDX3X [EC:3.6.4.13] | (RefSeq) DDX3X; DEAD-box helicase 3, X-linked	Hepatitis B (ko05161);; Viral carcinogenesis (ko05203);; RIG-I-like receptor signaling pathway (ko04622)	ko04622:RIG-I-like receptor signaling pathway;ko05203:Viral carcinogenesis;ko05161:Hepatitis B	[A]	RNA processing and modification	DEAD/DEAH box helicase;; Helicase conserved C-terminal domain	ATP-dependent RNA helicase DDX3X OS=Homo sapiens OX=9606 GN=DDX3X PE=1 SV=3	L	Replication, recombination and repair	DEAD/H (Asp-Glu-Ala-Asp/His) box polypeptide 3 variant, partial [Homo sapiens]
X	30050000	39050000	loss	ENSG00000147036	[V]	Defense mechanisms	Molecular Function: catalytic activity (GO:0003824);;	--	--	--	[V]	Defense mechanisms	Lanthionine synthetase C-like protein	LanC-like protein 3 OS=Homo sapiens OX=9606 GN=LANCL3 PE=2 SV=2	S	Function unknown	lanC-like protein 3 isoform 1 [Homo sapiens]
X	3950000	29350000	loss	ENSG00000165186	--	--	--	--	--	--	[R]	General function prediction only	Patched family;; Sterol-sensing domain of SREBP cleavage-activation	Patched domain-containing protein 1 OS=Homo sapiens OX=9606 GN=PTCHD1 PE=2 SV=2	S	Function unknown	patched domain-containing protein 1 [Homo sapiens]
X	30050000	39050000	loss	ENSG00000156313	[DZ]	Cell cycle control, cell division, chromosome partitioning ;; Cytoskeleton	--	K19607|0|hsa:6103|K19607 X-linked retinitis pigmentosa GTPase regulator | (RefSeq) RPGR, COD1, CORDX1, CRD, PCDX, RP15, RP3, XLRP3, orf15; retinitis pigmentosa GTPase regulator	--		[S]	Function unknown	Regulator of chromosome condensation (RCC1) repeat;; Regulator of chromosome condensation (RCC1) repeat;; Galactose oxidase, central domain	X-linked retinitis pigmentosa GTPase regulator OS=Homo sapiens OX=9606 GN=RPGR PE=1 SV=2	DZ	--	TPA: RPGR ORF15 isoform [Homo sapiens]
X	41000000	58450000	loss	ENSG00000102055	--	--	Cellular Component: protein phosphatase type 1 complex (GO:0000164);; Molecular Function: protein phosphatase inhibitor activity (GO:0004864);; Biological Process: regulation of signal transduction (GO:0009966);; Biological Process: negative regulation of catalytic activity (GO:0043086);; Biological Process: regulation of phosphoprotein phosphatase activity (GO:0043666);;	--	--	--	[OT]	--	Protein phosphatase inhibitor 2 (IPP-2)	Protein phosphatase inhibitor 2 family member C OS=Homo sapiens OX=9606 GN=PPP1R2C PE=1 SV=1	T	Signal transduction mechanisms	putative type-1 protein phosphatase inhibitor 4 [Homo sapiens]
X	3950000	29350000	loss	ENSG00000046647	--	--	Biological Process: spliceosomal snRNP assembly (GO:0000387);; Molecular Function: protein binding (GO:0005515);; Cellular Component: cytosol (GO:0005829);; Cellular Component: SMN complex (GO:0032797);; Cellular Component: SMN-Sm protein complex (GO:0034719);; Cellular Component: Gemini of coiled bodies (GO:0097504);;	K13136|5.78975e-164|hsa:54960|K13136 gem associated protein 8 | (RefSeq) GEMIN8, FAM51A1; gem nuclear organelle associated protein 8	RNA transport (ko03013)	ko03013:RNA transport	--	--	Gemini of Cajal bodies-associated protein 8	Gem-associated protein 8 OS=Homo sapiens OX=9606 GN=GEMIN8 PE=1 SV=1	S	Function unknown	PREDICTED: gem-associated protein 8 isoform X1 [Homo sapiens]
X	3950000	29350000	loss	ENSG00000149970	--	--	Cellular Component: Golgi apparatus (GO:0005794);; Biological Process: regulation of signal transduction (GO:0009966);; Molecular Function: kinase activity (GO:0016301);; Biological Process: phosphorylation (GO:0016310);; Molecular Function: identical protein binding (GO:0042802);; Cellular Component: neuron projection (GO:0043005);; Cellular Component: neuronal cell body (GO:0043025);; Cellular …	K17536|0|pon:100173234|K17536 connector enhancer of kinase suppressor of Ras 2 | (RefSeq) CNKSR2; connector enhancer of kinase suppressor of Ras 2	--		[F]	Nucleotide transport and metabolism	Protein of unknown function (DUF1170);; Connector enhancer of kinase suppressor of ras;; SAM domain (Sterile alpha motif);; PH domain;; SAM domain (Sterile alpha motif)	Connector enhancer of kinase suppressor of ras 2 OS=Homo sapiens OX=9606 GN=CNKSR2 PE=1 SV=1	T	Signal transduction mechanisms	connector enhancer of kinase suppressor of ras 2 isoform X7 [Papio anubis]
X	39100000	40950000	loss	ENSG00000185753	--	--	--	--	--	--	--	--	Domain of unknown function (DUF4559);; Anti-Mullerian hormone, N terminal region;; Domain of unknown function (DUF4559)	Uncharacterized protein CXorf38 OS=Homo sapiens OX=9606 GN=CXorf38 PE=1 SV=1	S	Function unknown	uncharacterized protein CXorf38 isoform 1 [Homo sapiens]
X	39100000	40950000	loss	ENSG00000180182	--	--	Molecular Function: RNA polymerase II transcription cofactor activity (GO:0001104);; Molecular Function: receptor activity (GO:0004872);; Biological Process: transcription initiation from RNA polymerase II promoter (GO:0006367);; Cellular Component: membrane (GO:0016020);; Cellular Component: mediator complex (GO:0016592);; Biological Process: stem cell population maintenance (GO:0019827);; Molec…	K15156|0|hsa:9282|K15156 mediator of RNA polymerase II transcription subunit 14 | (RefSeq) MED14, CRSP150, CRSP2, CSRP, CXorf4, DRIP150, EXLM1, RGR1, TRAP170; mediator complex subunit 14	Thyroid hormone signaling pathway (ko04919)	ko04919:Thyroid hormone signaling pathway	[K]	Transcription	Mediator complex subunit MED14	Mediator of RNA polymerase II transcription subunit 14 OS=Homo sapiens OX=9606 GN=MED14 PE=1 SV=2	K	Transcription	mediator of RNA polymerase II transcription subunit 14 [Homo sapiens]
X	3950000	29350000	loss	ENSG00000285602	[E]	Amino acid transport and metabolism	Molecular Function: virus receptor activity (GO:0001618);; Biological Process: regulation of cytokine production (GO:0001817);; Molecular Function: protein binding (GO:0001948);; Biological Process: angiotensin maturation (GO:0002003);; Biological Process: angiotensin catabolic process in blood (GO:0002005);; Biological Process: angiotensin-mediated drinking behavior (GO:0003051);; Molecular Func…	K09708|0|ggo:101142534|K09708 angiotensin-converting enzyme 2 [EC:3.4.17.23] | (RefSeq) ACE2; angiotensin I converting enzyme 2	Protein digestion and absorption (ko04974);; Renin-angiotensin system (ko04614)	ko04974:Protein digestion and absorption;ko04614:Renin-angiotensin system	[E]	Amino acid transport and metabolism	Angiotensin-converting enzyme;; Renal amino acid transporter;; Renal amino acid transporter	Angiotensin-converting enzyme 2 OS=Homo sapiens OX=9606 GN=ACE2 PE=1 SV=2	S	Function unknown	PREDICTED: angiotensin-converting enzyme 2 isoform X3 [Homo sapiens]
X	3950000	29350000	loss	ENSG00000073464	[T]	Signal transduction mechanisms	Cellular Component: Golgi membrane (GO:0000139);; Molecular Function: voltage-gated chloride channel activity (GO:0005247);; Molecular Function: ATP binding (GO:0005524);; Cellular Component: synaptic vesicle (GO:0008021);; Cellular Component: external side of plasma membrane (GO:0009897);; Molecular Function: antiporter activity (GO:0015297);; Cellular Component: integral component of membrane (…	K05012|0|ptr:473516|K05012 chloride channel 3/4/5 | (RefSeq) CLCN4; chloride voltage-gated channel 4	--		[P]	Inorganic ion transport and metabolism	Voltage gated chloride channel;; CBS domain	H(+)/Cl(-) exchange transporter 4 OS=Homo sapiens OX=9606 GN=CLCN4 PE=1 SV=2	P	Inorganic ion transport and metabolism	PREDICTED: H(+)/Cl(-) exchange transporter 4 [Cebus capucinus imitator]
X	3950000	29350000	loss	ENSG00000184831	--	--	Cellular Component: Golgi membrane (GO:0000139);; Molecular Function: protein binding (GO:0005515);; Cellular Component: endoplasmic reticulum membrane (GO:0005789);; Biological Process: lipid transport (GO:0006869);; Cellular Component: very-low-density lipoprotein particle (GO:0034361);; Cellular Component: low-density lipoprotein particle (GO:0034362);; Cellular Component: high-density lipopro…	--	--	--	[S]	Function unknown	Apolipoprotein O	MICOS complex subunit MIC26 OS=Homo sapiens OX=9606 GN=APOO PE=1 SV=1	S	Function unknown	PREDICTED: apolipoprotein O isoform X1 [Mandrillus leucophaeus]
X	30050000	39050000	loss	ENSG00000130962	--	--	Molecular Function: calcium ion binding (GO:0005509);; Cellular Component: extracellular region (GO:0005576);; Cellular Component: integral component of plasma membrane (GO:0005887);;	--	--	--	--	--	Vitamin K-dependent carboxylation/gamma-carboxyglutamic (GLA) domain	Transmembrane gamma-carboxyglutamic acid protein 1 OS=Homo sapiens OX=9606 GN=PRRG1 PE=1 SV=1	U	Intracellular trafficking, secretion, and vesicular transport	PREDICTED: transmembrane gamma-carboxyglutamic acid protein 1 isoform X1 [Macaca fascicularis]
X	3950000	29350000	loss	ENSG00000101911	[FE]	Nucleotide transport and metabolism ;; Amino acid transport and metabolism	Molecular Function: magnesium ion binding (GO:0000287);; Cellular Component: ribose phosphate diphosphokinase complex (GO:0002189);; Molecular Function: ribose phosphate diphosphokinase activity (GO:0004749);; Molecular Function: ATP binding (GO:0005524);; Cellular Component: cytosol (GO:0005829);; Biological Process: 5-phosphoribose 1-diphosphate biosynthetic process (GO:0006015);; Biological Pr…	K00948|0|ptr:735422|K00948 ribose-phosphate pyrophosphokinase [EC:2.7.6.1] | (RefSeq) PRPS2; phosphoribosyl pyrophosphate synthetase 2	Biosynthesis of amino acids (ko01230);; Pentose phosphate pathway (ko00030);; Carbon metabolism (ko01200);; Purine metabolism (ko00230)	ko01230:Biosynthesis of amino acids;ko00030:Pentose phosphate pathway;ko01200:Carbon metabolism;ko00230:Purine metabolism	[FE]	--	N-terminal domain of ribose phosphate pyrophosphokinase;; Phosphoribosyl synthetase-associated domain;; Phosphoribosyl transferase domain	Ribose-phosphate pyrophosphokinase 2 OS=Homo sapiens OX=9606 GN=PRPS2 PE=1 SV=2	F	Nucleotide transport and metabolism	PRPS2 protein, partial [Homo sapiens]
X	3950000	29350000	loss	ENSG00000173674	[J]	Translation, ribosomal structure and biogenesis	Molecular Function: translation initiation factor activity (GO:0003743);; Molecular Function: protein binding (GO:0005515);; Cellular Component: cytosol (GO:0005829);; Biological Process: translational initiation (GO:0006413);; Molecular Function: RNA binding (GO:0044822);;	K03236|4.18688e-59|xtr:448063|K03236 translation initiation factor 1A | (RefSeq) eif1ax, eif-1a, eif-4c, eif1a, eif1ap1, eif4c, ipp; eukaryotic translation initiation factor 1A, X-linked	RNA transport (ko03013)	ko03013:RNA transport	[J]	Translation, ribosomal structure and biogenesis	Translation initiation factor 1A / IF-1	Eukaryotic translation initiation factor 1A, X-chromosomal OS=Homo sapiens OX=9606 GN=EIF1AX PE=1 SV=2	J	Translation, ribosomal structure and biogenesis	Eukaryotic translation initiation factor 1A, X-chromosomal, partial [Macaca mulatta]
X	3950000	29350000	loss	ENSG00000102054	[R]	General function prediction only	Biological Process: negative regulation of transcription from RNA polymerase II promoter (GO:0000122);; Molecular Function: RNA polymerase II core promoter proximal region sequence-specific DNA binding (GO:0000978);; Molecular Function: RNA polymerase II distal enhancer sequence-specific DNA binding (GO:0000980);; Molecular Function: RNA binding (GO:0003723);; Molecular Function: histone deacetyl…	K11659|0|rno:83712|K11659 histone-binding protein RBBP7 | (RefSeq) Rbbp7; RB binding protein 7, chromatin remodeling factor	--		[B]	Chromatin structure and dynamics	Histone-binding protein RBBP4 or subunit C of CAF1 complex;; WD domain, G-beta repeat;; Anaphase-promoting complex subunit 4 WD40 domain;; Eukaryotic translation initiation factor eIF2A	Histone-binding protein RBBP7 OS=Homo sapiens OX=9606 GN=RBBP7 PE=1 SV=1	S	Function unknown	histone-binding protein RBBP7 isoform 2 [Homo sapiens]
X	3950000	29350000	loss	ENSG00000004961	--	--	Molecular Function: holocytochrome-c synthase activity (GO:0004408);; Cellular Component: mitochondrial inner membrane (GO:0005743);; Biological Process: animal organ morphogenesis (GO:0009887);; Molecular Function: metal ion binding (GO:0046872);; Biological Process: oxidation-reduction process (GO:0055114);;	K01764|7.04102e-166|ptr:465489|K01764 cytochrome c heme-lyase [EC:4.4.1.17] | (RefSeq) HCCS; holocytochrome c synthase	Porphyrin and chlorophyll metabolism (ko00860)	ko00860:Porphyrin and chlorophyll metabolism	[CO]	--	Cytochrome c/c1 heme lyase	Cytochrome c-type heme lyase OS=Homo sapiens OX=9606 GN=HCCS PE=1 SV=1	O	Posttranslational modification, protein turnover, chaperones	cytochrome c-type heme lyase [Homo sapiens]
X	3950000	29350000	loss	ENSG00000012174	[OK]	Posttranslational modification, protein turnover, chaperones ;; Transcription	--	K07765|1.83625e-168|myb:102251140|K07765 S2P endopeptidase [EC:3.4.24.85] | (RefSeq) MBTPS2; membrane bound transcription factor peptidase, site 2	Protein processing in endoplasmic reticulum (ko04141)	ko04141:Protein processing in endoplasmic reticulum	[O]	Posttranslational modification, protein turnover, chaperones	Peptidase family M50	Membrane-bound transcription factor site-2 protease OS=Homo sapiens OX=9606 GN=MBTPS2 PE=1 SV=1	M	Cell wall/membrane/envelope biogenesis	membrane-bound transcription factor site-2 protease [Homo sapiens]
X	3950000	29350000	loss	ENSG00000123595	[R]	General function prediction only	--	K07899|5.65186e-129|pon:100455031|K07899 Ras-related protein Rab-9A | (RefSeq) RAB9A; RAB9A, member RAS oncogene family	Measles (ko05162)	ko05162:Measles	[R]	General function prediction only	Ras family;; Ras of Complex, Roc, domain of DAPkinase;; ADP-ribosylation factor family;; 50S ribosome-binding GTPase	Ras-related protein Rab-9A OS=Homo sapiens OX=9606 GN=RAB9A PE=1 SV=1	S	Function unknown	PREDICTED: ras-related protein Rab-9A [Rhinopithecus bieti]
X	30050000	39050000	loss	ENSG00000147041	--	--	Molecular Function: calcium ion binding (GO:0005509);; Molecular Function: calcium-dependent phospholipid binding (GO:0005544);; Cellular Component: plasma membrane (GO:0005886);; Biological Process: intracellular protein transport (GO:0006886);; Biological Process: vesicle fusion (GO:0006906);; Molecular Function: Rab GTPase binding (GO:0017137);; Biological Process: regulation of calcium ion-de…	K17598|0|hsa:94122|K17598 synaptotagmin-like protein | (RefSeq) SYTL5, slp5; synaptotagmin like 5	--		[TU]	--	C2 domain;; FYVE-type zinc finger	Synaptotagmin-like protein 5 OS=Homo sapiens OX=9606 GN=SYTL5 PE=1 SV=1	S	Function unknown	synaptotagmin-like protein 5 isoform 1 [Homo sapiens]
X	3950000	29350000	loss	ENSG00000102172	[E]	Amino acid transport and metabolism	Cellular Component: cytosol (GO:0005829);; Biological Process: methionine metabolic process (GO:0006555);; Biological Process: spermine biosynthetic process (GO:0006597);; Molecular Function: spermine synthase activity (GO:0016768);; Cellular Component: extracellular exosome (GO:0070062);;	K00802|0|pps:100974711|K00802 spermine synthase [EC:2.5.1.22] | (RefSeq) spermine synthase	Glutathione metabolism (ko00480);; Cysteine and methionine metabolism (ko00270);; Arginine and proline metabolism (ko00330);; beta-Alanine metabolism (ko00410)	ko00480:Glutathione metabolism;ko00410:beta-Alanine metabolism;ko00270:Cysteine and methionine metabolism;ko00330:Arginine and proline metabolism	[E]	Amino acid transport and metabolism	Spermine/spermidine synthase domain;; Spermidine synthase tetramerisation domain	Spermine synthase OS=Homo sapiens OX=9606 GN=SMS PE=1 SV=2	E	Amino acid transport and metabolism	spermine synthase isoform 1 [Homo sapiens]
X	41000000	58450000	loss	ENSG00000065923	[P]	Inorganic ion transport and metabolism	Cellular Component: Golgi membrane (GO:0000139);; Cellular Component: trans-Golgi network (GO:0005802);; Biological Process: regulation of pH (GO:0006885);; Molecular Function: sodium:proton antiporter activity (GO:0015385);; Molecular Function: potassium:proton antiporter activity (GO:0015386);; Cellular Component: integral component of membrane (GO:0016021);; Biological Process: sodium ion tran…	K12041|0|hsa:84679|K12041 solute carrier family 9 (sodium/hydrogen exchanger), member 6/7 | (RefSeq) SLC9A7, NHE-7, NHE7, SLC9A6; solute carrier family 9 member A7	--		[P]	Inorganic ion transport and metabolism	Sodium/hydrogen exchanger family	Sodium/hydrogen exchanger 7 OS=Homo sapiens OX=9606 GN=SLC9A7 PE=1 SV=1	P	Inorganic ion transport and metabolism	sodium/hydrogen exchanger 7 isoform 1 precursor [Homo sapiens]
X	41000000	58450000	loss	ENSG00000102218	--	--	Biological Process: cell morphogenesis (GO:0000902);; Molecular Function: actin binding (GO:0003779);; Molecular Function: GTPase activator activity (GO:0005096);; Molecular Function: GTP binding (GO:0005525);; Cellular Component: Golgi apparatus (GO:0005794);; Cellular Component: centriole (GO:0005814);; Biological Process: post-Golgi vesicle-mediated transport (GO:0006892);; Biological Process:…	K18272|0|hsa:6102|K18272 protein XRP2 | (RefSeq) RP2, DELXp11.3, NM23-H10, NME10, TBCCD2, XRP2; retinitis pigmentosa 2 (X-linked recessive)	--		[O]	Posttranslational modification, protein turnover, chaperones	Tubulin binding cofactor C;; Adenylate cyclase associated (CAP) C terminal	Protein XRP2 OS=Homo sapiens OX=9606 GN=RP2 PE=1 SV=4	O	Posttranslational modification, protein turnover, chaperones	protein XRP2 [Homo sapiens]
X	3950000	29350000	loss	ENSG00000102230	[M]	Cell wall/membrane/envelope biogenesis	Biological Process: ovarian follicle development (GO:0001541);; Molecular Function: choline-phosphate cytidylyltransferase activity (GO:0004105);; Cellular Component: endoplasmic reticulum membrane (GO:0005789);; Biological Process: CDP-choline pathway (GO:0006657);; Biological Process: spermatogenesis (GO:0007283);;	K00968|0|ptr:465542|K00968 choline-phosphate cytidylyltransferase [EC:2.7.7.15] | (RefSeq) PCYT1B; phosphate cytidylyltransferase 1, choline, beta	Glycerophospholipid metabolism (ko00564);; Choline metabolism in cancer (ko05231)	ko00564:Glycerophospholipid metabolism;ko05231:Choline metabolism in cancer	[I]	Lipid transport and metabolism	Cytidylyltransferase-like	Choline-phosphate cytidylyltransferase B OS=Homo sapiens OX=9606 GN=PCYT1B PE=1 SV=1	IM	--	choline-phosphate cytidylyltransferase B isoform 2 [Homo sapiens]
X	39100000	40950000	loss	ENSG00000238205	--	--	Cellular Component: mitochondrial inner membrane (GO:0005743);; Biological Process: mitochondrial pyruvate transport (GO:0006850);; Cellular Component: integral component of membrane (GO:0016021);;	--	--	--	[S]	Function unknown	Uncharacterised protein family (UPF0041)	Mitochondrial pyruvate carrier 1-like protein OS=Homo sapiens OX=9606 GN=MPC1L PE=2 SV=1	S	Function unknown	mitochondrial pyruvate carrier 1-like protein [Homo sapiens]
X	3950000	29350000	loss	ENSG00000101871	--	--	Molecular Function: damaged DNA binding (GO:0003684);; Cellular Component: nucleoplasm (GO:0005654);; Cellular Component: spindle (GO:0005819);; Cellular Component: cytosol (GO:0005829);; Cellular Component: microtubule associated complex (GO:0005875);; Cellular Component: cytoplasmic microtubule (GO:0005881);; Biological Process: DNA dealkylation involved in DNA repair (GO:0006307);; Biological …	K08285|0|pps:100970390|K08285 midline 1 [EC:2.3.2.27] | (RefSeq) MID1; midline 1	Ubiquitin mediated proteolysis (ko04120)	ko04120:Ubiquitin mediated proteolysis	[O]	Posttranslational modification, protein turnover, chaperones	SPRY domain;; SPRY-associated domain;; B-box zinc finger;; Fibronectin type III domain;; RING-type zinc-finger;; Zinc finger, C3HC4 type (RING finger);; Zinc finger, C3HC4 type (RING finger)	E3 ubiquitin-protein ligase Midline-1 OS=Homo sapiens OX=9606 GN=MID1 PE=1 SV=1	S	Function unknown	E3 ubiquitin-protein ligase Midline-1 isoform 1 [Homo sapiens]
X	3950000	29350000	loss	ENSG00000101849	[T]	Signal transduction mechanisms	Cellular Component: histone deacetylase complex (GO:0000118);; Biological Process: negative regulation of transcription from RNA polymerase II promoter (GO:0000122);; Molecular Function: chromatin binding (GO:0003682);; Molecular Function: transcription corepressor activity (GO:0003714);; Cellular Component: transcription factor complex (GO:0005667);; Cellular Component: spindle microtubule (GO:0…	K04508|0|hsa:6907|K04508 transducin (beta)-like 1 | (RefSeq) TBL1X, EBI, SMAP55, TBL1; transducin beta like 1X-linked	Wnt signaling pathway (ko04310)	ko04310:Wnt signaling pathway	[B]	Chromatin structure and dynamics	WD domain, G-beta repeat;; Anaphase-promoting complex subunit 4 WD40 domain;; Eukaryotic translation initiation factor eIF2A;; LisH	F-box-like/WD repeat-containing protein TBL1X OS=Homo sapiens OX=9606 GN=TBL1X PE=1 SV=3	S	Function unknown	F-box-like/WD repeat-containing protein TBL1X isoform a [Homo sapiens]
X	3950000	29350000	loss	ENSG00000169239	[P]	Inorganic ion transport and metabolism	--	K01672|0|ptr:737324|K01672 carbonic anhydrase [EC:4.2.1.1] | (RefSeq) CA5B; carbonic anhydrase 5B	Nitrogen metabolism (ko00910)	ko00910:Nitrogen metabolism	[R]	General function prediction only	Eukaryotic-type carbonic anhydrase	Carbonic anhydrase 5B, mitochondrial OS=Homo sapiens OX=9606 GN=CA5B PE=1 SV=1	P	Inorganic ion transport and metabolism	carbonic anhydrase 5B, mitochondrial precursor [Homo sapiens]
X	3950000	29350000	loss	ENSG00000046651	--	--	Biological Process: G2/M transition of mitotic cell cycle (GO:0000086);; Cellular Component: nucleus (GO:0005634);; Cellular Component: centriole (GO:0005814);; Cellular Component: cytosol (GO:0005829);; Biological Process: centriole replication (GO:0007099);; Cellular Component: integral component of membrane (GO:0016021);; Cellular Component: centriolar satellite (GO:0034451);; Cellular Compone…	K16480|0|hsa:8481|K16480 oral-facial-digital syndrome 1 protein | (RefSeq) OFD1, 71-7A, CXorf5, JBTS10, RP23, SGBS2; OFD1, centriole and centriolar satellite protein	--		--	--	LisH;; LisH	Oral-facial-digital syndrome 1 protein OS=Homo sapiens OX=9606 GN=OFD1 PE=1 SV=1	S	Function unknown	PREDICTED: oral-facial-digital syndrome 1 protein isoform X4 [Homo sapiens]
X	3950000	29350000	loss	ENSG00000173681	--	--	Cellular Component: mitochondrion (GO:0005739);;	--	--	--	--	--	THRAP3/BCLAF1 family	BCLAF1 and THRAP3 family member 3 OS=Homo sapiens OX=9606 GN=BCLAF3 PE=1 SV=1	S	Function unknown	BCLAF1 and THRAP3 family member 3 [Homo sapiens]
X	3950000	29350000	loss	ENSG00000180815	[R]	General function prediction only	Biological Process: activation of MAPKK activity (GO:0000186);; Molecular Function: MAP kinase kinase kinase activity (GO:0004709);; Molecular Function: ATP binding (GO:0005524);; Cellular Component: intracellular (GO:0005622);; Molecular Function: metal ion binding (GO:0046872);;	K13986|0|hsa:389840|K13986 mitogen-activated protein kinase kinase kinase 15 [EC:2.7.11.25] | (RefSeq) MAP3K15, ASK3, bA723P2.3; mitogen-activated protein kinase kinase kinase 15	--		[T]	Signal transduction mechanisms	Domain of unknown function (DUF4071);; Protein kinase domain;; Protein tyrosine kinase	Mitogen-activated protein kinase kinase kinase 15 OS=Homo sapiens OX=9606 GN=MAP3K15 PE=1 SV=2	T	Signal transduction mechanisms	mitogen-activated protein kinase kinase kinase 15 [Homo sapiens]
X	39100000	40950000	loss	ENSG00000182220	--	--	Biological Process: angiotensin maturation (GO:0002003);; Molecular Function: aspartic-type endopeptidase activity (GO:0004190);; Molecular Function: receptor activity (GO:0004872);; Cellular Component: external side of plasma membrane (GO:0009897);; Cellular Component: integral component of membrane (GO:0016021);; Molecular Function: enzyme binding (GO:0019899);; Biological Process: rostrocaudal…	K19514|0|myb:102240245|K19514 renin receptor | (RefSeq) IQCG; IQ motif containing G	Renin-angiotensin system (ko04614)	ko04614:Renin-angiotensin system	[C]	Energy production and conversion	Renin receptor-like protein	Renin receptor OS=Homo sapiens OX=9606 GN=ATP6AP2 PE=1 SV=2	U	Intracellular trafficking, secretion, and vesicular transport	PREDICTED: renin receptor [Pan paniscus]
X	3950000	29350000	loss	ENSG00000226372	[R]	General function prediction only	--	--	--	--	[R]	General function prediction only	WD domain, G-beta repeat	DDB1- and CUL4-associated factor 8-like protein 1 OS=Homo sapiens OX=9606 GN=DCAF8L1 PE=2 SV=1	S	Function unknown	DDB1- and CUL4-associated factor 8-like protein 1 [Homo sapiens]
X	30050000	39050000	loss	ENSG00000198814	[C]	Energy production and conversion	--	K00864|0|hsa:2710|K00864 glycerol kinase [EC:2.7.1.30] | (RefSeq) GK, GK1, GKD; glycerol kinase	PPAR signaling pathway (ko03320);; Glycerolipid metabolism (ko00561)	ko00561:Glycerolipid metabolism;ko03320:PPAR signaling pathway	[G]	Carbohydrate transport and metabolism	FGGY family of carbohydrate kinases, N-terminal domain;; FGGY family of carbohydrate kinases, C-terminal domain	Glycerol kinase OS=Homo sapiens OX=9606 GN=GK PE=1 SV=3	C	Energy production and conversion	glycerol kinase isoform d [Homo sapiens]
X	41000000	58450000	loss	ENSG00000189037	--	--	Biological Process: inactivation of MAPK activity (GO:0000188);; Molecular Function: protein tyrosine phosphatase activity (GO:0004725);; Molecular Function: protein binding (GO:0005515);; Cellular Component: nucleus (GO:0005634);; Cellular Component: mitochondrial matrix (GO:0005759);; Molecular Function: MAP kinase tyrosine/serine/threonine phosphatase activity (GO:0017017);; Cellular Component…	K14165|5.63332e-129|hsa:63904|K14165 atypical dual specificity phosphatase [EC:3.1.3.16 3.1.3.48] | (RefSeq) DUSP21, LMWDSP21; dual specificity phosphatase 21	--		[V]	Defense mechanisms	Dual specificity phosphatase, catalytic domain	Dual specificity protein phosphatase 21 OS=Homo sapiens OX=9606 GN=DUSP21 PE=1 SV=1	T	Signal transduction mechanisms	dual specificity protein phosphatase 21 [Homo sapiens]
X	3950000	29350000	loss	ENSG00000205642	--	--	--	--	--	--	--	--	Variable charge X/Y family	--	--	--	hCG1988454, isoform CRA_c, partial [Homo sapiens]
X	41000000	58450000	loss	ENSG00000124479	--	--	--	--	--	--	[WV]	--	Cystine-knot domain;; DAN domain	Norrin OS=Homo sapiens OX=9606 GN=NDP PE=1 SV=1	O	Posttranslational modification, protein turnover, chaperones	norrin precursor [Homo sapiens]
X	3950000	29350000	loss	ENSG00000130021	[GR]	Carbohydrate transport and metabolism ;; General function prediction only	Cellular Component: cytosol (GO:0005829);; Biological Process: nucleotide metabolic process (GO:0009117);; Biological Process: dephosphorylation (GO:0016311);; Biological Process: pyrimidine nucleoside salvage (GO:0043097);; Molecular Function: metal ion binding (GO:0046872);; Cellular Component: extracellular exosome (GO:0070062);; Molecular Function: pseudouridine 5'-phosphatase activity (GO:19…	K17623|1.03327e-158|hsa:8226|K17623 pseudouridine 5'-phosphatase [EC:3.1.3.96] | (RefSeq) PUDP, DXF68S1E, FAM16AX, GS1, HDHD1, HDHD1A; pseudouridine 5'-phosphatase	--		[R]	General function prediction only	Haloacid dehalogenase-like hydrolase;; haloacid dehalogenase-like hydrolase;; HAD-hyrolase-like	Pseudouridine-5&apos;-phosphatase OS=Homo sapiens OX=9606 GN=PUDP PE=1 SV=3	S	Function unknown	pseudouridine-5&apos;-phosphatase isoform b [Homo sapiens]
X	3950000	29350000	loss	ENSG00000047648	--	--	Molecular Function: SH3/SH2 adaptor activity (GO:0005070);; Molecular Function: GTPase activator activity (GO:0005096);; Cellular Component: cytosol (GO:0005829);; Cellular Component: actin filament (GO:0005884);; Biological Process: activation of phospholipase C activity (GO:0007202);; Biological Process: Rho protein signal transduction (GO:0007266);; Biological Process: positive regulation of s…	K20631|0|hsa:395|K20631 Rho GTPase-activating protein 6 | (RefSeq) ARHGAP6, RHOGAP6, RHOGAPX-1; Rho GTPase activating protein 6	--		[TZ]	--	RhoGAP domain	Rho GTPase-activating protein 6 OS=Homo sapiens OX=9606 GN=ARHGAP6 PE=1 SV=3	S	Function unknown	rho GTPase-activating protein 6 isoform 1 [Homo sapiens]
X	30050000	39050000	loss	ENSG00000165168	[T]	Signal transduction mechanisms	--	K08008|0|ptr:465566|K08008 NADPH oxidase | (RefSeq) CYBB; cytochrome b-245 beta chain	Osteoclast differentiation (ko04380);; Phagosome (ko04145);; Leukocyte transendothelial migration (ko04670);; HIF-1 signaling pathway (ko04066);; AGE-RAGE signaling pathway in diabetic complications (ko04933)	ko04145:Phagosome;ko04066:HIF-1 signaling pathway;ko04380:Osteoclast differentiation;ko04670:Leukocyte transendothelial migration;ko04933:AGE-RAGE signaling pathway in diabetic complications	[PQ]	--	Ferric reductase NAD binding domain;; Ferric reductase like transmembrane component;; FAD-binding domain;; Oxidoreductase FAD-binding domain	Cytochrome b-245 heavy chain OS=Homo sapiens OX=9606 GN=CYBB PE=1 SV=2	U	Intracellular trafficking, secretion, and vesicular transport	cytochrome b-245 heavy chain [Homo sapiens]
X	41000000	58450000	loss	ENSG00000102221	--	--	Cellular Component: histone acetyltransferase complex (GO:0000123);; Molecular Function: protein binding (GO:0005515);; Molecular Function: zinc ion binding (GO:0008270);; Biological Process: histone H3 acetylation (GO:0043966);; Biological Process: histone H4-K5 acetylation (GO:0043981);; Biological Process: histone H4-K8 acetylation (GO:0043982);; Biological Process: histone H4-K12 acetylation …	--	--	--	[R]	General function prediction only	PHD-zinc-finger like domain;; PHD-like zinc-binding domain;; PHD-finger;; PHD-finger;; Enhancer of polycomb-like	Protein Jade-3 OS=Homo sapiens OX=9606 GN=JADE3 PE=1 SV=1	S	Function unknown	protein Jade-3 [Homo sapiens]
X	3950000	29350000	loss	ENSG00000146950	--	--	Biological Process: cell morphogenesis (GO:0000902);; Biological Process: lens morphogenesis in camera-type eye (GO:0002089);; Cellular Component: microtubule (GO:0005874);; Cellular Component: cell-cell adherens junction (GO:0005913);; Cellular Component: bicellular tight junction (GO:0005923);; Biological Process: brain development (GO:0007420);; Molecular Function: beta-catenin binding (GO:000…	K18625|0|hsa:357|K18625 protein Shroom | (RefSeq) SHROOM2, APXL, HSAPXL; shroom family member 2	Tight junction (ko04530)	ko04530:Tight junction	--	--	Apx/Shroom domain ASD2;; Apx/Shroom domain ASD1;; PDZ domain (Also known as DHR or GLGF)	Protein Shroom2 OS=Homo sapiens OX=9606 GN=SHROOM2 PE=1 SV=1	Z	Cytoskeleton	apical protein-like (Xenopus laevis) [Homo sapiens]
X	3950000	29350000	loss	ENSG00000177504	--	--	--	--	--	--	--	--	Variable charge X/Y family	--	--	--	hCG1988454, isoform CRA_c, partial [Homo sapiens]
X	41000000	58450000	loss	ENSG00000102226	--	--	Molecular Function: cysteine-type endopeptidase activity (GO:0004197);; Molecular Function: thiol-dependent ubiquitin-specific protease activity (GO:0004843);; Molecular Function: protein binding (GO:0005515);; Cellular Component: nucleus (GO:0005634);; Cellular Component: cytoplasm (GO:0005737);; Biological Process: ubiquitin-dependent protein catabolic process (GO:0006511);; Biological Process:…	K11835|0|hsa:8237|K11835 ubiquitin carboxyl-terminal hydrolase 4/11/15 [EC:3.4.19.12] | (RefSeq) USP11, UHX1; ubiquitin specific peptidase 11	--		[O]	Posttranslational modification, protein turnover, chaperones	Ubiquitin carboxyl-terminal hydrolase;; Ubiquitin carboxyl-terminal hydrolase;; DUSP domain;; Ubiquitin-like domain;; Ubiquitin-specific protease C-terminal	Ubiquitin carboxyl-terminal hydrolase 11 OS=Homo sapiens OX=9606 GN=USP11 PE=1 SV=3	O	Posttranslational modification, protein turnover, chaperones	PREDICTED: ubiquitin carboxyl-terminal hydrolase 11 [Gorilla gorilla gorilla]
X	3950000	29350000	loss	ENSG00000046653	--	--	Cellular Component: plasma membrane (GO:0005886);; Biological Process: nervous system development (GO:0007399);; Biological Process: protein transport (GO:0015031);; Cellular Component: integral component of membrane (GO:0016021);; Biological Process: cell differentiation (GO:0030154);; Biological Process: positive regulation of bone mineralization (GO:0030501);; Biological Process: regulation of…	--	--	--	[X]	--	Myelin proteolipid protein (PLP or lipophilin)	Neuronal membrane glycoprotein M6-b OS=Homo sapiens OX=9606 GN=GPM6B PE=1 SV=2	U	Intracellular trafficking, secretion, and vesicular transport	M6b, partial [Homo sapiens]
X	41000000	58450000	loss	ENSG00000182872	--	--	Biological Process: negative regulation of transcription from RNA polymerase II promoter (GO:0000122);; Molecular Function: nucleotide binding (GO:0000166);; Biological Process: regulation of alternative mRNA splicing, via spliceosome (GO:0000381);; Cellular Component: nucleoplasm (GO:0005654);; Molecular Function: zinc ion binding (GO:0008270);; Biological Process: negative regulation of cell pr…	K13094|0|aml:100469281|K13094 RNA-binding protein 5/10 | (RefSeq) RBM10; RNA binding motif protein 10	--		[R]	General function prediction only	G-patch domain;; RNA recognition motif. (a.k.a. RRM, RBD, or RNP domain);; G-patch domain;; Zn-finger in Ran binding protein and others	RNA-binding protein 10 OS=Homo sapiens OX=9606 GN=RBM10 PE=1 SV=3	S	Function unknown	RNA-binding protein 10 isoform X1 [Microcebus murinus]
X	154150000	154300000	loss	ENSG00000269433	--	--	Biological Process: retinoid metabolic process (GO:0001523);; Cellular Component: integral component of plasma membrane (GO:0005887);; Biological Process: G-protein coupled receptor signaling pathway (GO:0007186);; Biological Process: visual perception (GO:0007601);; Biological Process: phototransduction (GO:0007602);; Molecular Function: G-protein coupled photoreceptor activity (GO:0008020);; Bi…	K04251|0|pon:100445186|K04251 long/medium wavelength-sensitive opsin | (RefSeq) OPN1MW; medium-wave-sensitive opsin 1	--		[R]	General function prediction only	7 transmembrane receptor (rhodopsin family);; Serpentine type 7TM GPCR chemoreceptor Srw;; Serpentine type 7TM GPCR chemoreceptor Srsx;; Predicted transmembrane and coiled-coil 2 protein	Medium-wave-sensitive opsin 1 OS=Homo sapiens OX=9606 GN=OPN1MW PE=1 SV=1	U	Intracellular trafficking, secretion, and vesicular transport	hCG41347 [Homo sapiens]
X	41000000	58450000	loss	ENSG00000171657	--	--	--	K08420|0|hsa:27197|K08420 G protein-coupled receptor 82 | (RefSeq) GPR82; G protein-coupled receptor 82	--		--	--	7 transmembrane receptor (rhodopsin family)	Probable G-protein coupled receptor 82 OS=Homo sapiens OX=9606 GN=GPR82 PE=2 SV=1	U	Intracellular trafficking, secretion, and vesicular transport	probable G-protein coupled receptor 82 [Homo sapiens]
X	3950000	29350000	loss	ENSG00000183304	--	--	Molecular Function: protein binding (GO:0005515);; Cellular Component: nucleolus (GO:0005730);; Biological Process: spermatid development (GO:0007286);;	--	--	--	--	--	Cor1/Xlr/Xmr conserved region	Protein FAM9A OS=Homo sapiens OX=9606 GN=FAM9A PE=1 SV=1	S	Function unknown	protein FAM9A [Homo sapiens]
X	3950000	29350000	loss	ENSG00000184735	[L]	Replication, recombination and repair	Molecular Function: RNA binding (GO:0003723);; Molecular Function: ATP-dependent RNA helicase activity (GO:0004004);; Molecular Function: ATP binding (GO:0005524);; Cellular Component: nucleus (GO:0005634);; Biological Process: RNA secondary structure unwinding (GO:0010501);;	--	--	--	[A]	RNA processing and modification	DEAD/DEAH box helicase;; Helicase conserved C-terminal domain;; KH domain;; Type III restriction enzyme, res subunit	Probable ATP-dependent RNA helicase DDX53 OS=Homo sapiens OX=9606 GN=DDX53 PE=1 SV=3	L	Replication, recombination and repair	DEAD box protein 53 [Homo sapiens]
X	30050000	39050000	loss	ENSG00000169297	--	--	--	K08562|0|hsa:190|K08562 nuclear receptor subfamily 0 group B member 1 | (RefSeq) NR0B1, AHC, AHCH, AHX, DAX-1, DAX1, DSS, GTD, HHG, NROB1, SRXY2; nuclear receptor subfamily 0 group B member 1	--		[T]	Signal transduction mechanisms	Nuclear receptor repeat;; Ligand-binding domain of nuclear hormone receptor	Nuclear receptor subfamily 0 group B member 1 OS=Homo sapiens OX=9606 GN=NR0B1 PE=1 SV=2	K	Transcription	nuclear receptor subfamily 0 group B member 1 [Homo sapiens]
X	3950000	29350000	loss	ENSG00000101850	--	--	Molecular Function: protein binding (GO:0005515);; Cellular Component: lysosomal membrane (GO:0005765);; Cellular Component: Golgi apparatus (GO:0005794);; Biological Process: eye pigment biosynthetic process (GO:0006726);; Biological Process: neuropeptide signaling pathway (GO:0007218);; Biological Process: visual perception (GO:0007601);; Cellular Component: integral component of membrane (GO:0…	K08470|0|hsa:4935|K08470 Ocular albinism type 1 protein | (RefSeq) GPR143, NYS6, OA1; G protein-coupled receptor 143	--		--	--	Ocular albinism type 1 protein;; 7 transmembrane receptor (Secretin family)	G-protein coupled receptor 143 OS=Homo sapiens OX=9606 GN=GPR143 PE=1 SV=2	U	Intracellular trafficking, secretion, and vesicular transport	OA1 [Homo sapiens]
X	3950000	29350000	loss	ENSG00000165197	--	--	--	K05449|0|hsa:2277|K05449 vascular endothelial growth factor C/D | (RefSeq) VEGFD, FIGF, VEGF-D; vascular endothelial growth factor D	PI3K-Akt signaling pathway (ko04151);; Rap1 signaling pathway (ko04015);; Cytokine-cytokine receptor interaction (ko04060);; Pathways in cancer (ko05200);; Ras signaling pathway (ko04014);; Focal adhesion (ko04510);; AGE-RAGE signaling pathway in diabetic complications (ko04933);; TNF signaling pathway (ko04668)	ko04060:Cytokine-cytokine receptor interaction;ko04014:Ras signaling pathway;ko05200:Pathways in cancer;ko04015:Rap1 signaling pathway;ko04510:Focal adhesion;ko04668:TNF signaling pathway;ko04151:PI3K-Akt signaling pathway;ko04933:AGE-RAGE signaling pathway in diabetic complications	--	--	PDGF/VEGF domain	Vascular endothelial growth factor D OS=Homo sapiens OX=9606 GN=VEGFD PE=1 SV=1	A	RNA processing and modification	vascular endothelial growth factor D preproprotein [Homo sapiens]
X	3950000	29350000	loss	ENSG00000205542	--	--	Biological Process: osteoblast differentiation (GO:0001649);; Biological Process: platelet degranulation (GO:0002576);; Molecular Function: actin monomer binding (GO:0003785);; Cellular Component: extracellular region (GO:0005576);; Cellular Component: nucleus (GO:0005634);; Cellular Component: cytosol (GO:0005829);; Cellular Component: cytoskeleton (GO:0005856);; Biological Process: regulation o…	K05764|9.15984e-22|cjc:100399195|K05764 thymosin, beta 4 | (RefSeq) TMSB4X; thymosin beta 4, X-linked	Regulation of actin cytoskeleton (ko04810)	ko04810:Regulation of actin cytoskeleton	[N]	Cell motility	--	Thymosin beta-4 OS=Homo sapiens OX=9606 GN=TMSB4X PE=1 SV=2	O	Posttranslational modification, protein turnover, chaperones	thymosin, beta 4, Y-linked, partial [Homo sapiens]
X	41000000	58450000	loss	ENSG00000147119	--	--	Cellular Component: Golgi membrane (GO:0000139);; Molecular Function: N-acetylglucosamine 6-O-sulfotransferase activity (GO:0001517);; Biological Process: polysaccharide metabolic process (GO:0005976);; Biological Process: N-acetylglucosamine metabolic process (GO:0006044);; Molecular Function: chondroitin 6-sulfotransferase activity (GO:0008459);; Cellular Component: integral component of membra…	K04743|0|ptr:744227|K04743 chondroitin 6-sulfotransferase 7 [EC:2.8.2.17] | (RefSeq) CHST7; carbohydrate sulfotransferase 7	Glycosaminoglycan biosynthesis - chondroitin sulfate / dermatan sulfate (ko00532)	ko00532:Glycosaminoglycan biosynthesis - chondroitin sulfate / dermatan sulfate	--	--	Sulfotransferase domain;; Sulfotransferase family	Carbohydrate sulfotransferase 7 OS=Homo sapiens OX=9606 GN=CHST7 PE=1 SV=2	U	Intracellular trafficking, secretion, and vesicular transport	PREDICTED: carbohydrate sulfotransferase 7 isoform X2 [Pan paniscus]
X	3950000	29350000	loss	ENSG00000185915	[M]	Cell wall/membrane/envelope biogenesis	Molecular Function: ubiquitin-protein transferase activity (GO:0004842);; Cellular Component: extracellular space (GO:0005615);; Biological Process: protein ubiquitination (GO:0016567);; Cellular Component: Cul3-RING ubiquitin ligase complex (GO:0031463);;	K10469|0|hsa:257240|K10469 kelch-like protein 34 | (RefSeq) KLHL34; kelch like family member 34	--		[TR]	--	Kelch motif;; BTB/POZ domain;; Galactose oxidase, central domain;; Kelch motif;; Kelch motif;; Galactose oxidase, central domain;; Kelch motif;; BTB And C-terminal Kelch	Kelch-like protein 34 OS=Homo sapiens OX=9606 GN=KLHL34 PE=2 SV=1	S	Function unknown	kelch-like protein 34 [Homo sapiens]
X	3950000	29350000	loss	ENSG00000086712	--	--	--	--	--	--	[Z]	Cytoskeleton	Myosin-like coiled-coil protein	Gamma-taxilin OS=Homo sapiens OX=9606 GN=TXLNG PE=1 SV=2	S	Function unknown	PREDICTED: gamma-taxilin isoform X1 [Chlorocebus sabaeus]
X	3950000	29350000	loss	ENSG00000169906	--	--	--	K14734|7.5439e-47|rro:104667065|K14734 S100 calcium binding protein G | (RefSeq) S100G; S100 calcium binding protein G	Mineral absorption (ko04978)	ko04978:Mineral absorption	--	--	S-100/ICaBP type calcium binding domain;; EF hand;; EF hand;; EF-hand domain pair;; EF-hand domain;; EF-hand domain pair	Protein S100-G OS=Homo sapiens OX=9606 GN=S100G PE=3 SV=2	S	Function unknown	protein S100-G [Homo sapiens]
X	30050000	39050000	loss	ENSG00000132446	--	--	Cellular Component: cell (GO:0005623);; Biological Process: iron ion transport (GO:0006826);; Biological Process: cellular iron ion homeostasis (GO:0006879);; Molecular Function: ferric iron binding (GO:0008199);;	--	--	--	[P]	Inorganic ion transport and metabolism	Ferritin-like domain	Ferritin heavy polypeptide-like 17 OS=Homo sapiens OX=9606 GN=FTHL17 PE=2 SV=1	P	Inorganic ion transport and metabolism	ferritin heavy polypeptide-like 17 [Homo sapiens]
X	3950000	29350000	loss	ENSG00000182583	--	--	--	--	--	--	--	--	Variable charge X/Y family	--	--	--	hCG1988454, isoform CRA_c, partial [Homo sapiens]
X	3950000	29350000	loss	ENSG00000047644	--	--	Biological Process: negative regulation of transcription from RNA polymerase II promoter (GO:0000122);; Cellular Component: cytosol (GO:0005829);; Molecular Function: kinase binding (GO:0019900);; Molecular Function: protein complex scaffold activity (GO:0032947);; Biological Process: negative regulation of hippo signaling (GO:0035331);; Biological Process: negative regulation of organ growth (GO…	--	--	--	--	--	WW domain	Protein WWC3 OS=Homo sapiens OX=9606 GN=WWC3 PE=1 SV=3	S	Function unknown	WWC family member 3 [Homo sapiens]
X	30050000	39050000	loss	ENSG00000036473	[E]	Amino acid transport and metabolism	Biological Process: urea cycle (GO:0000050);; Biological Process: liver development (GO:0001889);; Molecular Function: ornithine carbamoyltransferase activity (GO:0004585);; Molecular Function: phospholipid binding (GO:0005543);; Cellular Component: mitochondrial inner membrane (GO:0005743);; Cellular Component: mitochondrial matrix (GO:0005759);; Biological Process: ornithine catabolic process (…	K00611|0|hsa:5009|K00611 ornithine carbamoyltransferase [EC:2.1.3.3] | (RefSeq) OTC, OCTD; ornithine carbamoyltransferase	Arginine biosynthesis (ko00220);; Biosynthesis of amino acids (ko01230)	ko00220:Arginine biosynthesis;ko01230:Biosynthesis of amino acids	[E]	Amino acid transport and metabolism	Aspartate/ornithine carbamoyltransferase, Asp/Orn binding domain;; Aspartate/ornithine carbamoyltransferase, carbamoyl-P binding domain	Ornithine carbamoyltransferase, mitochondrial OS=Homo sapiens OX=9606 GN=OTC PE=1 SV=3	E	Amino acid transport and metabolism	ornithine carbamoyltransferase, mitochondrial precursor [Homo sapiens]
X	30050000	39050000	loss	ENSG00000120280	--	--	--	--	--	--	--	--	Domain of unknown function (DUF4569)	Uncharacterized protein CXorf21 OS=Homo sapiens OX=9606 GN=CXorf21 PE=2 SV=1	S	Function unknown	uncharacterized protein CXorf21 [Homo sapiens]
X	3950000	29350000	loss	ENSG00000102104	--	--	Molecular Function: phosphatidylserine binding (GO:0001786);; Molecular Function: phosphatidylinositol-4,5-bisphosphate binding (GO:0005546);; Molecular Function: phosphatidylinositol-3,4,5-trisphosphate binding (GO:0005547);; Cellular Component: extracellular space (GO:0005615);; Biological Process: phagocytosis (GO:0006909);; Biological Process: cell adhesion (GO:0007155);; Biological Process: …	--	--	--	--	--	F5/8 type C domain	Retinoschisin OS=Homo sapiens OX=9606 GN=RS1 PE=1 SV=2	O	Posttranslational modification, protein turnover, chaperones	retinoschisin precursor [Homo sapiens]
X	3950000	29350000	loss	ENSG00000176896	--	--	Molecular Function: DNA binding (GO:0003677);; Molecular Function: protein binding (GO:0005515);; Cellular Component: nucleus (GO:0005634);; Biological Process: regulation of transcription from RNA polymerase II promoter (GO:0006357);; Biological Process: regulation of DNA-templated transcription, elongation (GO:0032784);;	--	--	--	[K]	Transcription	Transcription factor S-II (TFIIS), central domain;; TFIIS helical bundle-like domain	Transcription elongation factor A N-terminal and central domain-containing protein OS=Homo sapiens OX=9606 GN=TCEANC PE=1 SV=2	K	Transcription	transcription elongation factor A N-terminal and central domain-containing protein isoform 1 [Homo sapiens]
X	41000000	58450000	loss	ENSG00000147124	[R]	General function prediction only	Molecular Function: DNA binding (GO:0003677);; Molecular Function: transcription factor activity, sequence-specific DNA binding (GO:0003700);; Molecular Function: protein binding (GO:0005515);; Cellular Component: nucleus (GO:0005634);; Biological Process: regulation of transcription, DNA-templated (GO:0006355);; Molecular Function: metal ion binding (GO:0046872);;	K09228|0|hsa:7592|K09228 KRAB domain-containing zinc finger protein | (RefSeq) ZNF41, MRX89; zinc finger protein 41	--		[R]	General function prediction only	Zinc-finger double domain;; Zinc finger, C2H2 type;; C2H2-type zinc finger;; KRAB box;; Zinc ribbon domain;; C2H2-type zinc finger;; Adenylate kinase, active site lid;; Probable zinc-ribbon domain;; zinc-finger-containing domain;; Double zinc ribbon;; TFIIH C1-like domain;; XPA protein N-terminal	Zinc finger protein 41 OS=Homo sapiens OX=9606 GN=ZNF41 PE=1 SV=2	S	Function unknown	zinc finger protein 41 isoform a [Homo sapiens]
X	3950000	29350000	loss	ENSG00000230797	[R]	General function prediction only	Biological Process: negative regulation of transcription from RNA polymerase II promoter (GO:0000122);; Molecular Function: metalloendopeptidase activity (GO:0004222);; Cellular Component: transcription factor complex (GO:0005667);; Cellular Component: cytoplasm (GO:0005737);; Biological Process: cholesterol metabolic process (GO:0008203);; Cellular Component: integral component of membrane (GO:0…	K09201|0|hsa:404281|K09201 transcription factor YY | (RefSeq) YY2, ZNF631; YY2 transcription factor	--		[R]	General function prediction only	Zinc-finger double domain;; Zinc finger, C2H2 type;; C2H2-type zinc finger	Transcription factor YY2 OS=Homo sapiens OX=9606 GN=YY2 PE=2 SV=1	S	Function unknown	transcription factor yin yang 2 [Homo sapiens]
X	41000000	58450000	loss	ENSG00000147123	--	--	Molecular Function: protein binding (GO:0005515);; Cellular Component: mitochondrial respiratory chain complex I (GO:0005747);; Biological Process: mitochondrial electron transport, NADH to ubiquinone (GO:0006120);; Cellular Component: integral component of membrane (GO:0016021);; Biological Process: mitochondrial respiratory chain complex I assembly (GO:0032981);;	K11351|2.70553e-119|rro:104664585|K11351 NADH dehydrogenase (ubiquinone) 1 beta subcomplex subunit 11 | (RefSeq) NDUFB11; NADH:ubiquinone oxidoreductase subunit B11	Parkinson's disease (ko05012);; Huntington's disease (ko05016);; Non-alcoholic fatty liver disease (NAFLD) (ko04932);; Alzheimer's disease (ko05010);; Oxidative phosphorylation (ko00190)	ko00190:Oxidative phosphorylation;ko05016:Huntington's disease;ko04932:Non-alcoholic fatty liver disease (NAFLD);ko05010:Alzheimer's disease;ko05012:Parkinson's disease	[S]	Function unknown	ESSS subunit of NADH:ubiquinone oxidoreductase (complex I)	NADH dehydrogenase [ubiquinone] 1 beta subcomplex subunit 11, mitochondrial OS=Homo sapiens OX=9606 GN=NDUFB11 PE=1 SV=1	U	Intracellular trafficking, secretion, and vesicular transport	PREDICTED: NADH dehydrogenase [ubiquinone] 1 beta subcomplex subunit 11, mitochondrial [Rhinopithecus roxellana]
X	3950000	29350000	loss	ENSG00000004848	--	--	Biological Process: negative regulation of transcription from RNA polymerase II promoter (GO:0000122);; Molecular Function: RNA polymerase II distal enhancer sequence-specific DNA binding (GO:0000980);; Molecular Function: transcriptional repressor activity, RNA polymerase II distal enhancer sequence-specific binding (GO:0001206);; Molecular Function: chromatin binding (GO:0003682);; Cellular Com…	K09452|8.26169e-138|ggo:101147736|K09452 homeobox protein aristaless-related | (RefSeq) ARX; aristaless related homeobox	--		[R]	General function prediction only	Homeobox domain;; OAR domain	Homeobox protein ARX OS=Homo sapiens OX=9606 GN=ARX PE=1 SV=1	K	Transcription	homeobox protein ARX [Piliocolobus tephrosceles]
X	3950000	29350000	loss	ENSG00000101846	[P]	Inorganic ion transport and metabolism	Molecular Function: steryl-sulfatase activity (GO:0004773);; Cellular Component: nuclear envelope (GO:0005635);; Cellular Component: lysosome (GO:0005764);; Cellular Component: endosome (GO:0005768);; Cellular Component: endoplasmic reticulum lumen (GO:0005788);; Cellular Component: endoplasmic reticulum membrane (GO:0005789);; Cellular Component: Golgi apparatus (GO:0005794);; Cellular Component…	K01131|0|hsa:412|K01131 steryl-sulfatase [EC:3.1.6.2] | (RefSeq) STS, ARSC, ARSC1, ASC, ES, SSDD, XLI; steroid sulfatase (microsomal), isozyme S	Steroid hormone biosynthesis (ko00140)	ko00140:Steroid hormone biosynthesis	[R]	General function prediction only	Sulfatase;; C-terminal region of aryl-sulfatase;; Type I phosphodiesterase / nucleotide pyrophosphatase	Steryl-sulfatase OS=Homo sapiens OX=9606 GN=STS PE=1 SV=2	P	Inorganic ion transport and metabolism	steryl-sulfatase isoform 1 precursor [Homo sapiens]
X	30050000	39050000	loss	ENSG00000189023	--	--	--	--	--	--	[S]	Function unknown	Melanoma associated antigen family N terminal;; MAGE family	Melanoma-associated antigen B16 OS=Homo sapiens OX=9606 GN=MAGEB16 PE=4 SV=2	S	Function unknown	melanoma-associated antigen B16 [Homo sapiens]
X	41000000	58450000	loss	ENSG00000171659	--	--	--	K08383|0|ptr:473572|K08383 G protein-coupled receptor 34 | (RefSeq) GPR34; G protein-coupled receptor 34	--		--	--	7 transmembrane receptor (rhodopsin family)	Probable G-protein coupled receptor 34 OS=Homo sapiens OX=9606 GN=GPR34 PE=2 SV=2	U	Intracellular trafficking, secretion, and vesicular transport	probable G-protein coupled receptor 34 [Homo sapiens]
X	3950000	29350000	loss	ENSG00000175809	--	--	Cellular Component: cytoplasm (GO:0005737);; Molecular Function: zinc ion binding (GO:0008270);; Biological Process: protein ubiquitination (GO:0016567);; Molecular Function: ligase activity (GO:0016874);; Biological Process: regulation of cell adhesion (GO:0030155);; Molecular Function: ubiquitin protein ligase activity (GO:0061630);;	K15714|0|hsa:158506|K15714 E3 ubiquitin-protein ligase ZNF645 [EC:2.3.2.27] | (RefSeq) ZNF645, CT138, HAKAIL; zinc finger protein 645	--		[O]	Posttranslational modification, protein turnover, chaperones	--	E3 ubiquitin-protein ligase CBLL2 OS=Homo sapiens OX=9606 GN=CBLL2 PE=1 SV=1	O	Posttranslational modification, protein turnover, chaperones	E3 ubiquitin-protein ligase ZNF645 [Homo sapiens]
X	3950000	29350000	loss	ENSG00000091482	--	--	--	--	--	--	--	--	Stretch-responsive small skeletal muscle X protein, Chisel	Small muscular protein OS=Homo sapiens OX=9606 GN=SMPX PE=2 SV=3	S	Function unknown	small muscular protein [Homo sapiens]
X	3950000	29350000	loss	ENSG00000147003	--	--	Molecular Function: protein binding (GO:0005515);; Cellular Component: cytoplasm (GO:0005737);; Biological Process: proteolysis (GO:0006508);; Molecular Function: metallopeptidase activity (GO:0008237);; Molecular Function: peptidyl-dipeptidase activity (GO:0008241);; Cellular Component: integral component of membrane (GO:0016021);; Cellular Component: brush border membrane (GO:0031526);; Biologi…	K20004|3.33001e-146|pon:100435255|K20004 collectrin | (RefSeq) TMEM27; transmembrane protein 27	--		--	--	Renal amino acid transporter	Collectrin OS=Homo sapiens OX=9606 GN=TMEM27 PE=1 SV=1	S	Function unknown	PREDICTED: collectrin [Pan troglodytes]
X	30050000	39050000	loss	ENSG00000185448	--	--	--	--	--	--	--	--	FAM47 family	Protein FAM47A OS=Homo sapiens OX=9606 GN=FAM47A PE=2 SV=3	S	Function unknown	protein FAM47A [Homo sapiens]
X	3950000	29350000	loss	ENSG00000176746	--	--	Molecular Function: protein binding (GO:0005515);;	--	--	--	[S]	Function unknown	Melanoma associated antigen family N terminal;; MAGE family;; Domain of unknown function (DUF3409)	Melanoma-associated antigen B6 OS=Homo sapiens OX=9606 GN=MAGEB6 PE=1 SV=2	S	Function unknown	melanoma-associated antigen B6 [Homo sapiens]
X	41000000	58450000	loss	ENSG00000188937	--	--	Molecular Function: protein kinase inhibitor activity (GO:0004860);; Cellular Component: proteinaceous extracellular matrix (GO:0005578);; Cellular Component: cytoplasm (GO:0005737);; Biological Process: negative regulation of protein kinase activity (GO:0006469);; Biological Process: visual perception (GO:0007601);; Biological Process: cytokine-mediated signaling pathway (GO:0019221);; Biologica…	K08129|0|ptr:473571|K08129 nyctalopin | (RefSeq) NYX; nyctalopin	--		[WT]	--	Leucine rich repeat;; Leucine Rich repeats (2 copies);; Leucine-rich repeat;; Leucine rich repeats (6 copies);; Leucine Rich Repeat	Nyctalopin OS=Homo sapiens OX=9606 GN=NYX PE=1 SV=1	S	Function unknown	nyctalopin precursor [Homo sapiens]
X	3950000	29350000	loss	ENSG00000177189	[T]	Signal transduction mechanisms	Molecular Function: magnesium ion binding (GO:0000287);; Biological Process: skeletal system development (GO:0001501);; Biological Process: toll-like receptor signaling pathway (GO:0002224);; Molecular Function: protein serine/threonine kinase activity (GO:0004674);; Molecular Function: ATP binding (GO:0005524);; Cellular Component: nucleoplasm (GO:0005654);; Cellular Component: cytosol (GO:00058…	K04373|0|pps:100986115|K04373 ribosomal protein S6 kinase alpha-1/2/3/6 [EC:2.7.11.1] | (RefSeq) RPS6KA3; ribosomal protein S6 kinase A3	Insulin resistance (ko04931);; Oocyte meiosis (ko04114);; Progesterone-mediated oocyte maturation (ko04914);; Long-term potentiation (ko04720);; MAPK signaling pathway (ko04010);; Neurotrophin signaling pathway (ko04722);; mTOR signaling pathway (ko04150)	ko04931:Insulin resistance;ko04722:Neurotrophin signaling pathway;ko04720:Long-term potentiation;ko04010:MAPK signaling pathway;ko04914:Progesterone-mediated oocyte maturation;ko04150:mTOR signaling pathway;ko04114:Oocyte meiosis	[T]	Signal transduction mechanisms	Protein kinase domain;; Protein tyrosine kinase;; Kinase-like;; Lipopolysaccharide kinase (Kdo/WaaP) family;; Protein kinase C terminal domain;; Haspin like kinase domain;; Phosphotransferase enzyme family	Ribosomal protein S6 kinase alpha-3 OS=Homo sapiens OX=9606 GN=RPS6KA3 PE=1 SV=1	T	Signal transduction mechanisms	ribosomal protein S6 kinase alpha-3 [Homo sapiens]
X	3950000	29350000	loss	ENSG00000169891	--	--	--	K20068|0|hsa:9185|K20068 RalBP1-associated Eps domain-containing protein | (RefSeq) REPS2, POB1; RALBP1 associated Eps domain containing 2	--		[U]	Intracellular trafficking, secretion, and vesicular transport	Cytoskeletal-regulatory complex EF hand	RalBP1-associated Eps domain-containing protein 2 OS=Homo sapiens OX=9606 GN=REPS2 PE=1 SV=2	S	Function unknown	ralBP1-associated Eps domain-containing protein 2 isoform 1 [Homo sapiens]
X	3950000	29350000	loss	ENSG00000188408	--	--	--	--	--	--	[S]	Function unknown	MAGE family	Melanoma-associated antigen B5 OS=Homo sapiens OX=9606 GN=MAGEB5 PE=2 SV=2	S	Function unknown	PREDICTED: melanoma-associated antigen B5 [Pan paniscus]
X	30050000	39050000	loss	ENSG00000165169	--	--	--	K10420|4.47612e-78|ocu:100340863|K10420 dynein light chain Tctex-type 1 | (RefSeq) DYNLT3; dynein light chain Tctex-type 3	--		[N]	Cell motility	Tctex-1 family	Dynein light chain Tctex-type 3 OS=Homo sapiens OX=9606 GN=DYNLT3 PE=1 SV=1	S	Function unknown	dynein light chain Tctex-type 3 [Homo sapiens]
X	41000000	58450000	loss	ENSG00000147044	[T]	Signal transduction mechanisms	Biological Process: negative regulation of cell-matrix adhesion (GO:0001953);; Molecular Function: guanylate kinase activity (GO:0004385);; Molecular Function: protein serine/threonine kinase activity (GO:0004674);; Molecular Function: calmodulin binding (GO:0005516);; Molecular Function: ATP binding (GO:0005524);; Cellular Component: basement membrane (GO:0005604);; Cellular Component: extracell…	K06103|0|pps:100995623|K06103 calcium/calmodulin-dependent serine protein kinase [EC:2.7.11.1] | (RefSeq) CASK; calcium/calmodulin dependent serine protein kinase	Tight junction (ko04530)	ko04530:Tight junction	[T]	Signal transduction mechanisms	Protein kinase domain;; Guanylate kinase;; Protein tyrosine kinase;; L27 domain;; PDZ domain (Also known as DHR or GLGF);; Variant SH3 domain;; SH3 domain	Peripheral plasma membrane protein CASK OS=Homo sapiens OX=9606 GN=CASK PE=1 SV=3	F	Nucleotide transport and metabolism	peripheral plasma membrane protein CASK isoform 3 [Homo sapiens]
X	3950000	29350000	loss	ENSG00000234469	--	--	Molecular Function: structural molecule activity (GO:0005198);; Cellular Component: plasma membrane (GO:0005886);; Cellular Component: bicellular tight junction (GO:0005923);; Cellular Component: integral component of membrane (GO:0016021);;	--	--	--	--	--	--	Claudin-34 OS=Homo sapiens OX=9606 GN=CLDN34 PE=3 SV=2	S	Function unknown	claudin-34 [Homo sapiens]
X	3950000	29350000	loss	ENSG00000067992	--	--	Molecular Function: protein serine/threonine kinase activity (GO:0004674);; Molecular Function: pyruvate dehydrogenase (acetyl-transferring) kinase activity (GO:0004740);; Molecular Function: protein binding (GO:0005515);; Molecular Function: ATP binding (GO:0005524);; Cellular Component: mitochondrial matrix (GO:0005759);; Biological Process: regulation of acetyl-CoA biosynthetic process from py…	K00898|0|chx:102180838|K00898 pyruvate dehydrogenase kinase 2/3/4 [EC:2.7.11.2] | (RefSeq) PDK3; pyruvate dehydrogenase kinase 3	--		[T]	Signal transduction mechanisms	Mitochondrial branched-chain alpha-ketoacid dehydrogenase kinase;; Histidine kinase-, DNA gyrase B-, and HSP90-like ATPase	[Pyruvate dehydrogenase (acetyl-transferring)] kinase isozyme 3, mitochondrial OS=Homo sapiens OX=9606 GN=PDK3 PE=1 SV=1	T	Signal transduction mechanisms	pyruvate dehydrogenase kinase, isozyme 3 isoform 2 precursor [Homo sapiens]
X	3950000	29350000	loss	ENSG00000123131	[V]	Defense mechanisms	--	K03386|8.53121e-178|pps:100991501|K03386 peroxiredoxin (alkyl hydroperoxide reductase subunit C) [EC:1.11.1.15] | (RefSeq) PRDX4; peroxiredoxin 4	--		[O]	Posttranslational modification, protein turnover, chaperones	AhpC/TSA family;; C-terminal domain of 1-Cys peroxiredoxin;; Redoxin	Peroxiredoxin-4 OS=Homo sapiens OX=9606 GN=PRDX4 PE=1 SV=1	O	Posttranslational modification, protein turnover, chaperones	peroxiredoxin-4 precursor [Homo sapiens]
X	154150000	154300000	loss	ENSG00000007350	[G]	Carbohydrate transport and metabolism	--	K00615|0|hsa:8277|K00615 transketolase [EC:2.2.1.1] | (RefSeq) TKTL1, TKR, TKT2; transketolase like 1	Pentose phosphate pathway (ko00030);; Carbon metabolism (ko01200);; Biosynthesis of amino acids (ko01230)	ko00030:Pentose phosphate pathway;ko01200:Carbon metabolism;ko01230:Biosynthesis of amino acids	[G]	Carbohydrate transport and metabolism	Transketolase, pyrimidine binding domain;; Transketolase, C-terminal domain;; Transketolase, thiamine diphosphate binding domain;; Dehydrogenase E1 component	Transketolase-like protein 1 OS=Homo sapiens OX=9606 GN=TKTL1 PE=1 SV=2	G	Carbohydrate transport and metabolism	transketolase-like protein 1 isoform a [Homo sapiens]
X	3950000	29350000	loss	ENSG00000147010	--	--	Cellular Component: cytosol (GO:0005829);; Cellular Component: cytoskeleton (GO:0005856);; Cellular Component: plasma membrane (GO:0005886);; Cellular Component: cell-cell junction (GO:0005911);; Cellular Component: focal adhesion (GO:0005925);; Biological Process: endocytosis (GO:0006897);; Biological Process: apoptotic process (GO:0006915);; Biological Process: cytoskeleton organization (GO:000…	K12470|0|hsa:30011|K12470 SH3 domain-containing kinase-binding protein 1 | (RefSeq) SH3KBP1, CD2BP3, CIN85, GIG10, HSB-1, HSB1, MIG18; SH3 domain containing kinase binding protein 1	Endocytosis (ko04144)	ko04144:Endocytosis	[T]	Signal transduction mechanisms	Variant SH3 domain;; SH3 domain;; Variant SH3 domain	SH3 domain-containing kinase-binding protein 1 OS=Homo sapiens OX=9606 GN=SH3KBP1 PE=1 SV=2	S	Function unknown	SH3 domain-containing kinase-binding protein 1 isoform a [Homo sapiens]
X	30050000	39050000	loss	ENSG00000101955	--	--	Biological Process: phagolysosome assembly (GO:0001845);; Cellular Component: autophagosome (GO:0005776);; Cellular Component: endoplasmic reticulum (GO:0005783);; Biological Process: autophagy (GO:0006914);; Biological Process: cell adhesion (GO:0007155);; Cellular Component: cell surface (GO:0009986);; Cellular Component: membrane (GO:0016020);; Biological Process: response to endoplasmic retic…	--	--	--	--	--	Domain of unknown function (DUF4174);; HYR domain;; Sushi repeat (SCR repeat)	Sushi repeat-containing protein SRPX OS=Homo sapiens OX=9606 GN=SRPX PE=1 SV=1	S	Function unknown	sushi repeat-containing protein SRPX isoform 1 precursor [Homo sapiens]
X	3950000	29350000	loss	ENSG00000044446	[G]	Carbohydrate transport and metabolism	Molecular Function: phosphorylase kinase activity (GO:0004689);; Molecular Function: calmodulin binding (GO:0005516);; Cellular Component: cytosol (GO:0005829);; Cellular Component: plasma membrane (GO:0005886);; Cellular Component: phosphorylase kinase complex (GO:0005964);; Biological Process: glycogen catabolic process (GO:0005980);; Biological Process: protein phosphorylation (GO:0006468);;	K07190|0|hsa:5256|K07190 phosphorylase kinase alpha/beta subunit | (RefSeq) PHKA2, GSD9A, PHK, PYK, PYKL, XLG, XLG2; phosphorylase kinase regulatory subunit alpha 2	Calcium signaling pathway (ko04020);; Insulin signaling pathway (ko04910);; Glucagon signaling pathway (ko04922)	ko04922:Glucagon signaling pathway;ko04020:Calcium signaling pathway;ko04910:Insulin signaling pathway	[G]	Carbohydrate transport and metabolism	Glycosyl hydrolases family 15	Phosphorylase b kinase regulatory subunit alpha, liver isoform OS=Homo sapiens OX=9606 GN=PHKA2 PE=1 SV=1	T	Signal transduction mechanisms	phosphorylase b kinase regulatory subunit alpha, liver isoform [Homo sapiens]
X	3950000	29350000	loss	ENSG00000184368	--	--	Biological Process: microtubule cytoskeleton organization (GO:0000226);; Molecular Function: structural molecule activity (GO:0005198);; Cellular Component: microtubule cytoskeleton (GO:0015630);;	--	--	--	--	--	MAP7 (E-MAP-115) family	MAP7 domain-containing protein 2 OS=Homo sapiens OX=9606 GN=MAP7D2 PE=1 SV=2	S	Function unknown	MAP7 domain-containing protein 2 isoform 2 [Homo sapiens]
X	3950000	29350000	loss	ENSG00000232030	--	--	Molecular Function: protein binding (GO:0005515);;	--	--	--	[S]	Function unknown	Melanoma associated antigen family N terminal;; MAGE family	Melanoma-associated antigen B6 OS=Homo sapiens OX=9606 GN=MAGEB6 PE=1 SV=2	S	Function unknown	PREDICTED: melanoma-associated antigen B6-like [Pan paniscus]
X	3950000	29350000	loss	ENSG00000102010	--	;;	Biological Process: NK T cell differentiation (GO:0001865);; Molecular Function: non-membrane spanning protein tyrosine kinase activity (GO:0004715);; Molecular Function: signal transducer activity (GO:0004871);; Molecular Function: receptor binding (GO:0005102);; Molecular Function: ATP binding (GO:0005524);; Cellular Component: cytosol (GO:0005829);; Biological Process: cellular component disas…	K08896|0|pps:100968853|K08896 cytoplasmic tyrosine-protein kinase BMX [EC:2.7.10.2] | (RefSeq) BMX; BMX non-receptor tyrosine kinase	--		[T]	Signal transduction mechanisms	Protein tyrosine kinase;; Protein kinase domain;; SH2 domain;; PH domain;; BTK motif	Cytoplasmic tyrosine-protein kinase BMX OS=Homo sapiens OX=9606 GN=BMX PE=1 SV=1	T	Signal transduction mechanisms	Etk/Bmx cytosolic tyrosine kinase [Homo sapiens]
X	154150000	154300000	loss	ENSG00000278057	--	--	Cellular Component: integral component of membrane (GO:0016021);;	--	--	--	[S]	Function unknown	Predicted transmembrane and coiled-coil 2 protein	Testis-specific protein TEX28 OS=Homo sapiens OX=9606 GN=TEX28 PE=2 SV=1	S	Function unknown	PREDICTED: testis-specific protein TEX28 isoform X1 [Homo sapiens]
X	3950000	29350000	loss	ENSG00000047230	[F]	Nucleotide transport and metabolism	Molecular Function: CTP synthase activity (GO:0003883);; Molecular Function: protein binding (GO:0005515);; Molecular Function: ATP binding (GO:0005524);; Cellular Component: mitochondrion (GO:0005739);; Cellular Component: cytosol (GO:0005829);; Biological Process: glutamine metabolic process (GO:0006541);; Biological Process: nucleobase-containing small molecule interconversion (GO:0015949);; B…	K01937|0|hsa:56474|K01937 CTP synthase [EC:6.3.4.2] | (RefSeq) CTPS2; CTP synthase 2	Pyrimidine metabolism (ko00240)	ko00240:Pyrimidine metabolism	[F]	Nucleotide transport and metabolism	CTP synthase N-terminus;; Glutamine amidotransferase class-I;; Peptidase C26	CTP synthase 2 OS=Homo sapiens OX=9606 GN=CTPS2 PE=1 SV=1	F	Nucleotide transport and metabolism	PREDICTED: CTP synthase 2 isoform X1 [Homo sapiens]
X	2800000	3850000	loss	ENSG00000183943	[M]	Cell wall/membrane/envelope biogenesis	Biological Process: angiogenesis (GO:0001525);; Biological Process: endothelial cell proliferation (GO:0001935);; Molecular Function: cAMP-dependent protein kinase activity (GO:0004691);; Molecular Function: protein binding (GO:0005515);; Molecular Function: ATP binding (GO:0005524);; Cellular Component: nucleus (GO:0005634);; Cellular Component: cytoplasm (GO:0005737);; Biological Process: pepti…	--	--	--	[T]	Signal transduction mechanisms	Protein kinase domain;; Protein tyrosine kinase;; Kinase-like	cAMP-dependent protein kinase catalytic subunit PRKX OS=Homo sapiens OX=9606 GN=PRKX PE=1 SV=1	T	Signal transduction mechanisms	LOW QUALITY PROTEIN: cAMP-dependent protein kinase catalytic subunit PRKX-like [Piliocolobus tephrosceles]
X	41000000	58450000	loss	ENSG00000147050	[R]	General function prediction only	Molecular Function: RNA polymerase II core promoter proximal region sequence-specific DNA binding (GO:0000978);; Biological Process: in utero embryonic development (GO:0001701);; Biological Process: neural tube closure (GO:0001843);; Biological Process: heart morphogenesis (GO:0003007);; Biological Process: respiratory system process (GO:0003016);; Molecular Function: methyltransferase activity (…	K11447|0|mcf:102122893|K11447 histone demethylase [EC:1.14.11.-] | (RefSeq) KDM6A, UTX; lysine demethylase 6A	Transcriptional misregulation in cancer (ko05202)	ko05202:Transcriptional misregulation in cancer	[R]	General function prediction only	JmjC domain, hydroxylase;; Tetratricopeptide repeat;; Tetratricopeptide repeat;; Tetratricopeptide repeat;; Tetratricopeptide repeat;; Tetratricopeptide repeat;; Tetratricopeptide repeat;; Tetratricopeptide repeat;; Tetratricopeptide repeat	Lysine-specific demethylase 6A OS=Homo sapiens OX=9606 GN=KDM6A PE=1 SV=2	S	Function unknown	lysine-specific demethylase 6A isoform 1 [Homo sapiens]
X	41000000	58450000	loss	ENSG00000147121	--	--	Molecular Function: DNA binding (GO:0003677);; Cellular Component: nucleus (GO:0005634);; Biological Process: regulation of transcription, DNA-templated (GO:0006355);; Molecular Function: metal ion binding (GO:0046872);;	K09228|0|nle:100599600|K09228 KRAB domain-containing zinc finger protein | (RefSeq) zinc finger protein 674-like	--		[R]	General function prediction only	KRAB box	Zinc finger protein 674 OS=Homo sapiens OX=9606 GN=ZNF674 PE=2 SV=1	S	Function unknown	PREDICTED: LOW QUALITY PROTEIN: zinc finger protein 674-like [Nomascus leucogenys]
X	3950000	29350000	loss	ENSG00000177138	--	--	Molecular Function: protein binding (GO:0005515);; Cellular Component: nucleoplasm (GO:0005654);; Biological Process: spermatid development (GO:0007286);;	K19528|5.71726e-107|pps:100974846|K19528 synaptonemal complex protein 3 | (RefSeq) FAM9B; family with sequence similarity 9 member B	Homologous recombination (ko03440)	ko03440:Homologous recombination	--	--	Cor1/Xlr/Xmr conserved region	Protein FAM9B OS=Homo sapiens OX=9606 GN=FAM9B PE=1 SV=1	S	Function unknown	unnamed protein product [Homo sapiens]
X	3950000	29350000	loss	ENSG00000176774	--	--	Molecular Function: protein binding (GO:0005515);; Cellular Component: cytoplasm (GO:0005737);;	--	--	--	[S]	Function unknown	Melanoma associated antigen family N terminal;; MAGE family	Melanoma-associated antigen B18 OS=Homo sapiens OX=9606 GN=MAGEB18 PE=1 SV=2	S	Function unknown	RecName: Full=Melanoma-associated antigen B18; AltName: Full=MAGE-B18 antigen
X	3950000	29350000	loss	ENSG00000008086	[T]	Signal transduction mechanisms	--	K08824|0|nle:100583908|K08824 cyclin-dependent kinase-like [EC:2.7.11.22] | (RefSeq) CDKL5; cyclin dependent kinase like 5	--		[R]	General function prediction only	Protein kinase domain;; Protein tyrosine kinase	Cyclin-dependent kinase-like 5 OS=Homo sapiens OX=9606 GN=CDKL5 PE=1 SV=1	T	Signal transduction mechanisms	cyclin-dependent kinase-like 5 isoform 2 [Homo sapiens]
X	41000000	58450000	loss	ENSG00000147117	[R]	General function prediction only	Biological Process: negative regulation of transcription from RNA polymerase II promoter (GO:0000122);; Molecular Function: DNA binding (GO:0003677);; Molecular Function: transcription factor activity, sequence-specific DNA binding (GO:0003700);; Cellular Component: nucleus (GO:0005634);; Molecular Function: metal ion binding (GO:0046872);;	K09228|0|cjc:100386525|K09228 KRAB domain-containing zinc finger protein | (RefSeq) ZNF157; zinc finger protein 157	--		[R]	General function prediction only	Zinc-finger double domain;; Zinc finger, C2H2 type;; C2H2-type zinc finger;; C2H2-type zinc finger;; KRAB box;; Zinc-finger double-stranded RNA-binding;; Zinc ribbon domain;; AN1-like Zinc finger	Zinc finger protein 157 OS=Homo sapiens OX=9606 GN=ZNF157 PE=2 SV=2	S	Function unknown	PREDICTED: zinc finger protein 157 isoform X1 [Cebus capucinus imitator]
X	3950000	29350000	loss	ENSG00000101916	[K]	Transcription	Cellular Component: Golgi membrane (GO:0000139);; Biological Process: microglial cell activation (GO:0001774);; Biological Process: regulation of protein phosphorylation (GO:0001932);; Biological Process: MyD88-dependent toll-like receptor signaling pathway (GO:0002755);; Molecular Function: DNA binding (GO:0003677);; Molecular Function: double-stranded RNA binding (GO:0003725);; Molecular Functi…	K10170|0|hsa:51311|K10170 toll-like receptor 8 | (RefSeq) TLR8, CD288; toll like receptor 8	Toll-like receptor signaling pathway (ko04620)	ko04620:Toll-like receptor signaling pathway	[T]	Signal transduction mechanisms	Leucine rich repeat;; Leucine Rich repeats (2 copies);; TIR domain;; Leucine Rich Repeat;; Leucine rich repeats (6 copies);; TIR domain	Toll-like receptor 8 OS=Homo sapiens OX=9606 GN=TLR8 PE=1 SV=1	S	Function unknown	toll-like receptor 8 isoform 1 [Homo sapiens]
X	3950000	29350000	loss	ENSG00000101958	[X]	Mobilome: prophages, transposons	Cellular Component: integral component of plasma membrane (GO:0005887);; Biological Process: neuropeptide signaling pathway (GO:0007218);; Biological Process: synapse assembly (GO:0007416);; Molecular Function: glycine binding (GO:0016594);; Molecular Function: extracellular-glycine-gated chloride channel activity (GO:0016934);; Biological Process: spinal cord development (GO:0021510);; Molecular…	K05194|0|hsa:2742|K05194 glycine receptor alpha-2 | (RefSeq) GLRA2, GLR; glycine receptor alpha 2	Neuroactive ligand-receptor interaction (ko04080)	ko04080:Neuroactive ligand-receptor interaction	[T]	Signal transduction mechanisms	Neurotransmitter-gated ion-channel ligand binding domain;; Neurotransmitter-gated ion-channel transmembrane region	Glycine receptor subunit alpha-2 OS=Homo sapiens OX=9606 GN=GLRA2 PE=1 SV=1	U	Intracellular trafficking, secretion, and vesicular transport	glycine receptor subunit alpha-2 isoform A precursor [Homo sapiens]
X	3950000	29350000	loss	ENSG00000006757	--	--	--	K11157|1.92452e-164|hsa:8228|K11157 patatin-like phospholipase domain-containing protein 4 [EC:3.1.1.-] | (RefSeq) PNPLA4, DXS1283E, GS2, iPLA2eta; patatin like phospholipase domain containing 4	Retinol metabolism (ko00830)	ko00830:Retinol metabolism	[U]	Intracellular trafficking, secretion, and vesicular transport	Patatin-like phospholipase	Patatin-like phospholipase domain-containing protein 4 OS=Homo sapiens OX=9606 GN=PNPLA4 PE=2 SV=3	S	Function unknown	patatin-like phospholipase domain-containing protein 4 isoform X4 [Papio anubis]
X	154150000	154300000	loss	ENSG00000166160	--	--	Biological Process: retinoid metabolic process (GO:0001523);; Cellular Component: integral component of plasma membrane (GO:0005887);; Biological Process: G-protein coupled receptor signaling pathway (GO:0007186);; Biological Process: visual perception (GO:0007601);; Biological Process: phototransduction (GO:0007602);; Molecular Function: G-protein coupled photoreceptor activity (GO:0008020);; Bi…	K04251|0|pon:100445186|K04251 long/medium wavelength-sensitive opsin | (RefSeq) OPN1MW; medium-wave-sensitive opsin 1	--		[R]	General function prediction only	7 transmembrane receptor (rhodopsin family);; Serpentine type 7TM GPCR chemoreceptor Srw;; Serpentine type 7TM GPCR chemoreceptor Srsx	Medium-wave-sensitive opsin 1 OS=Homo sapiens OX=9606 GN=OPN1MW PE=1 SV=1	U	Intracellular trafficking, secretion, and vesicular transport	hCG41347 [Homo sapiens]
X	41000000	58450000	loss	ENSG00000124486	--	--	--	K11840|0|hsa:8239|K11840 ubiquitin carboxyl-terminal hydrolase 9/24 [EC:3.4.19.12] | (RefSeq) USP9X, DFFRX, FAF, FAM, MRX99, MRXS99F; ubiquitin specific peptidase 9, X-linked	--		[O]	Posttranslational modification, protein turnover, chaperones	Ubiquitin carboxyl-terminal hydrolase;; Ubiquitin carboxyl-terminal hydrolase	Probable ubiquitin carboxyl-terminal hydrolase FAF-X OS=Homo sapiens OX=9606 GN=USP9X PE=1 SV=3	O	Posttranslational modification, protein turnover, chaperones	probable ubiquitin carboxyl-terminal hydrolase FAF-X isoform 3 [Homo sapiens]
X	3950000	29350000	loss	ENSG00000187268	--	--	Molecular Function: protein binding (GO:0005515);; Cellular Component: nucleus (GO:0005634);; Biological Process: spermatid development (GO:0007286);; Cellular Component: integral component of membrane (GO:0016021);;	--	--	--	--	--	--	Protein FAM9C OS=Homo sapiens OX=9606 GN=FAM9C PE=1 SV=1	--	--	family with sequence similarity 9, member C, isoform CRA_a [Homo sapiens]
X	30050000	39050000	loss	ENSG00000214107	--	--	--	--	--	--	[S]	Function unknown	Melanoma associated antigen family N terminal;; MAGE family	Melanoma-associated antigen B1 OS=Homo sapiens OX=9606 GN=MAGEB1 PE=1 SV=2	S	Function unknown	DAM10=DSS-AHC critical interval MAGE superfamily protein [Homo sapiens]
X	30050000	39050000	loss	ENSG00000099399	--	--	--	--	--	--	[S]	Function unknown	Melanoma associated antigen family N terminal;; MAGE family	Melanoma-associated antigen B2 OS=Homo sapiens OX=9606 GN=MAGEB2 PE=1 SV=3	S	Function unknown	melanoma-associated antigen B2 [Homo sapiens]
X	3950000	29350000	loss	ENSG00000169895	--	--	--	--	--	--	[U]	Intracellular trafficking, secretion, and vesicular transport	BSD domain	Synapse-associated protein 1 OS=Homo sapiens OX=9606 GN=SYAP1 PE=1 SV=1	S	Function unknown	unnamed protein product [Homo sapiens]
X	41000000	58450000	loss	ENSG00000147113	--	--	Cellular Component: extracellular region (GO:0005576);; Biological Process: regulation of signal transduction (GO:0009966);;	--	--	--	--	--	Protein-kinase domain of FAM69	Deleted in autism-related protein 1 OS=Homo sapiens OX=9606 GN=CXorf36 PE=2 SV=3	S	Function unknown	deleted in autism-related protein 1 isoform 1 precursor [Homo sapiens]
X	3950000	29350000	loss	ENSG00000165192	[T]	Signal transduction mechanisms	--	K10333|0|hsa:140456|K10333 ankyrin repeat and SOCS box protein 11 | (RefSeq) ASB11; ankyrin repeat and SOCS box containing 11	--		[R]	General function prediction only	Ankyrin repeats (3 copies);; Ankyrin repeat;; Ankyrin repeats (many copies);; Ankyrin repeats (many copies);; Ankyrin repeat;; SOCS box	Ankyrin repeat and SOCS box protein 11 OS=Homo sapiens OX=9606 GN=ASB11 PE=1 SV=1	S	Function unknown	ankyrin repeat and SOCS box protein 11 isoform c [Homo sapiens]
X	41000000	58450000	loss	ENSG00000130988	[G]	Carbohydrate transport and metabolism	Biological Process: kidney development (GO:0001822);; Molecular Function: gluconolactonase activity (GO:0004341);; Molecular Function: calcium ion binding (GO:0005509);; Cellular Component: nucleoplasm (GO:0005654);; Cellular Component: cytosol (GO:0005829);; Biological Process: negative regulation of protein kinase activity (GO:0006469);; Biological Process: cellular calcium ion homeostasis (GO:…	K01053|0|hsa:9104|K01053 gluconolactonase [EC:3.1.1.17] | (RefSeq) RGN, GNL, HEL-S-41, RC, SMP30; regucalcin	Pentose phosphate pathway (ko00030);; Ascorbate and aldarate metabolism (ko00053);; Carbon metabolism (ko01200)	ko01200:Carbon metabolism;ko00053:Ascorbate and aldarate metabolism;ko00030:Pentose phosphate pathway	[PT]	--	SMP-30/Gluconolaconase/LRE-like region	Regucalcin OS=Homo sapiens OX=9606 GN=RGN PE=1 SV=1	G	Carbohydrate transport and metabolism	regucalcin isoform 1 [Homo sapiens]
X	3950000	29350000	loss	ENSG00000130066	[J]	Translation, ribosomal structure and biogenesis	Biological Process: neurotransmitter uptake (GO:0001504);; Biological Process: angiogenesis (GO:0001525);; Molecular Function: diamine N-acetyltransferase activity (GO:0004145);; Molecular Function: chloride channel activity (GO:0005254);; Molecular Function: sodium:amino acid symporter activity (GO:0005283);; Molecular Function: L-histidine transmembrane transporter activity (GO:0005290);; Molec…	K00657|5.96954e-122|ptr:465538|K00657 diamine N-acetyltransferase [EC:2.3.1.57] | (RefSeq) SAT; diamine acetyltransferase 1	Arginine and proline metabolism (ko00330)	ko00330:Arginine and proline metabolism	[E]	Amino acid transport and metabolism	Acetyltransferase (GNAT) family;; Acetyltransferase (GNAT) domain;; Acetyltransferase (GNAT) domain	Diamine acetyltransferase 1 OS=Homo sapiens OX=9606 GN=SAT1 PE=1 SV=1	K	Transcription	diamine acetyltransferase 1 [Homo sapiens]
X	3950000	29350000	loss	ENSG00000087842	[R]	General function prediction only	--	K06911|0|hsa:8544|K06911 uncharacterized protein | (RefSeq) PIR; pirin	--		--	--	Pirin C-terminal cupin domain;; Pirin	Pirin OS=Homo sapiens OX=9606 GN=PIR PE=1 SV=1	S	Function unknown	pirin [Homo sapiens]
X	41000000	58450000	loss	ENSG00000130985	[O]	Posttranslational modification, protein turnover, chaperones	Cellular Component: heterochromatin (GO:0000792);; Molecular Function: ubiquitin activating enzyme activity (GO:0004839);; Molecular Function: ubiquitin-protein transferase activity (GO:0004842);; Molecular Function: protein binding (GO:0005515);; Molecular Function: ATP binding (GO:0005524);; Cellular Component: nucleus (GO:0005634);; Cellular Component: mitochondrion (GO:0005739);; Cellular Com…	K03178|0|hsa:7317|K03178 ubiquitin-activating enzyme E1 [EC:6.2.1.45] | (RefSeq) UBA1, A1S9, A1S9T, A1ST, AMCX1, CFAP124, GXP1, POC20, SMAX2, UBA1A, UBE1, UBE1X; ubiquitin like modifier activating enzyme 1	Parkinson's disease (ko05012);; Ubiquitin mediated proteolysis (ko04120)	ko05012:Parkinson's disease;ko04120:Ubiquitin mediated proteolysis	[O]	Posttranslational modification, protein turnover, chaperones	ThiF family;; Ubiquitin-activating enzyme active site;; Ubiquitin fold domain;; Ubiquitin-activating enzyme E1 FCCH domain;; Ubiquitin-activating enzyme E1 four-helix bundle	Ubiquitin-like modifier-activating enzyme 1 OS=Homo sapiens OX=9606 GN=UBA1 PE=1 SV=3	H	Coenzyme transport and metabolism	ubiquitin-like modifier-activating enzyme 1 [Homo sapiens]
X	30050000	39050000	loss	ENSG00000147027	--	--	Cellular Component: plasma membrane (GO:0005886);; Cellular Component: cell-cell junction (GO:0005911);; Cellular Component: adherens junction (GO:0005912);; Cellular Component: integral component of membrane (GO:0016021);; Biological Process: single-organism cellular process (GO:0044763);; Biological Process: regulation of cellular process (GO:0050794);; Biological Process: cell-cell adhesion (G…	--	--	--	[R]	General function prediction only	--	Transmembrane protein 47 OS=Homo sapiens OX=9606 GN=TMEM47 PE=1 SV=1	S	Function unknown	transmembrane protein 47 [Homo sapiens]
X	3950000	29350000	loss	ENSG00000125363	--	--	Biological Process: osteoblast differentiation (GO:0001649);; Biological Process: epithelial to mesenchymal transition (GO:0001837);; Biological Process: chondrocyte differentiation (GO:0002062);; Cellular Component: proteinaceous extracellular matrix (GO:0005578);; Biological Process: cell adhesion (GO:0007155);; Biological Process: signal transduction (GO:0007165);; Molecular Function: growth f…	--	--	--	--	--	Amelogenin	Amelogenin, X isoform OS=Homo sapiens OX=9606 GN=AMELX PE=1 SV=1	O	Posttranslational modification, protein turnover, chaperones	PREDICTED: amelogenin, X isoform isoform X1 [Rhinopithecus roxellana]
X	2800000	3850000	loss	ENSG00000124343	--	--	--	--	--	--	--	--	CD99 antigen like protein 2	Glycoprotein Xg OS=Homo sapiens OX=9606 GN=XG PE=2 SV=1	S	Function unknown	unnamed protein product [Homo sapiens]
X	3950000	29350000	loss	ENSG00000169249	--	--	--	--	--	--	[A]	RNA processing and modification	Zinc finger C-x8-C-x5-C-x3-H type (and similar);; RNA recognition motif. (a.k.a. RRM, RBD, or RNP domain)	U2 small nuclear ribonucleoprotein auxiliary factor 35 kDa subunit-related protein 2 OS=Homo sapiens OX=9606 GN=ZRSR2 PE=1 SV=2	S	Function unknown	PREDICTED: U2 small nuclear ribonucleoprotein auxiliary factor 35 kDa subunit-related protein 2 [Cercocebus atys]
X	3950000	29350000	loss	ENSG00000131831	--	--	--	--	--	--	--	--	Sine oculis-binding protein	Retinoic acid-induced protein 2 OS=Homo sapiens OX=9606 GN=RAI2 PE=1 SV=2	O	Posttranslational modification, protein turnover, chaperones	PREDICTED: retinoic acid-induced protein 2 isoform X2 [Pan paniscus]
X	3950000	29350000	loss	ENSG00000174010	[M]	Cell wall/membrane/envelope biogenesis	Molecular Function: ubiquitin-protein transferase activity (GO:0004842);; Cellular Component: Cul3-RING ubiquitin ligase complex (GO:0031463);; Biological Process: protein ubiquitination involved in ubiquitin-dependent protein catabolic process (GO:0042787);;	K10452|0|hsa:80311|K10452 kelch-like protein 15 | (RefSeq) KLHL15, HEL-S-305; kelch like family member 15	--		[TR]	--	Kelch motif;; Kelch motif;; BTB/POZ domain;; Galactose oxidase, central domain;; Galactose oxidase, central domain;; BTB And C-terminal Kelch;; Kelch motif;; Kelch motif	Kelch-like protein 15 OS=Homo sapiens OX=9606 GN=KLHL15 PE=1 SV=2	S	Function unknown	kelch-like protein 15 [Homo sapiens]
X	3950000	29350000	loss	ENSG00000123130	[I]	Lipid transport and metabolism	--	K17361|0|mcf:102145163|K17361 acyl-coenzyme A thioesterase 9 [EC:3.1.2.-] | (RefSeq) ACOT9; acyl-CoA thioesterase 9	--		[I]	Lipid transport and metabolism	Thioesterase superfamily	Acyl-coenzyme A thioesterase 9, mitochondrial OS=Homo sapiens OX=9606 GN=ACOT9 PE=1 SV=2	S	Function unknown	acyl-coenzyme A thioesterase 9, mitochondrial isoform a precursor [Homo sapiens]
X	2800000	3850000	loss	ENSG00000056998	[M]	Cell wall/membrane/envelope biogenesis	Cellular Component: cytosol (GO:0005829);; Biological Process: glycogen biosynthetic process (GO:0005978);; Biological Process: glycogen catabolic process (GO:0005980);; Molecular Function: glycogenin glucosyltransferase activity (GO:0008466);; Cellular Component: lysosomal lumen (GO:0043202);;	K00750|0|hsa:8908|K00750 glycogenin [EC:2.4.1.186] | (RefSeq) GYG2, GN-2, GN2; glycogenin 2	--		[G]	Carbohydrate transport and metabolism	Glycosyl transferase family 8	Glycogenin-2 OS=Homo sapiens OX=9606 GN=GYG2 PE=1 SV=2	O	Posttranslational modification, protein turnover, chaperones	glycogenin-2 isoform b [Homo sapiens]
X	41000000	58450000	loss	ENSG00000251192	[R]	General function prediction only	Molecular Function: DNA binding (GO:0003677);; Cellular Component: nucleus (GO:0005634);; Biological Process: regulation of transcription, DNA-templated (GO:0006355);; Molecular Function: metal ion binding (GO:0046872);;	K09228|0|hsa:641339|K09228 KRAB domain-containing zinc finger protein | (RefSeq) ZNF674, MRX92, ZNF673B; zinc finger protein 674	--		[R]	General function prediction only	Zinc-finger double domain;; Zinc finger, C2H2 type;; C2H2-type zinc finger;; KRAB box;; C2H2-type zinc finger;; Zinc-finger double-stranded RNA-binding;; Zinc ribbon domain	Zinc finger protein 674 OS=Homo sapiens OX=9606 GN=ZNF674 PE=2 SV=1	S	Function unknown	hCG15400, isoform CRA_a [Homo sapiens]
X	3950000	29350000	loss	ENSG00000102048	[T]	Signal transduction mechanisms	Molecular Function: protein binding (GO:0005515);; Cellular Component: mitochondrion (GO:0005739);; Biological Process: protein ubiquitination (GO:0016567);; Biological Process: intracellular signal transduction (GO:0035556);; Biological Process: positive regulation of protein catabolic process (GO:0045732);;	K10331|5.5285e-180|ggo:101135801|K10331 ankyrin repeat and SOCS box protein 9 | (RefSeq) ASB9; ankyrin repeat and SOCS box containing 9	--		[R]	General function prediction only	Ankyrin repeats (3 copies);; Ankyrin repeat;; Ankyrin repeat;; Ankyrin repeats (many copies);; Ankyrin repeats (many copies);; SOCS box	Ankyrin repeat and SOCS box protein 9 OS=Homo sapiens OX=9606 GN=ASB9 PE=1 SV=1	S	Function unknown	hypothetical protein, partial [Homo sapiens]
X	2800000	3850000	loss	ENSG00000101825	[K]	Transcription	Cellular Component: extracellular exosome (GO:0070062);;	--	--	--	[R]	General function prediction only	Immunoglobulin I-set domain;; Immunoglobulin domain;; Immunoglobulin domain;; Immunoglobulin domain;; Immunoglobulin V-set domain;; Leucine rich repeat;; Izumo-like Immunoglobulin domain;; Ig-like domain on T-cell surface glycoprotein CD3 epsilon chain;; Leucine Rich repeats (2 copies);; Natural killer cell receptor 2B4	Matrix-remodeling-associated protein 5 OS=Homo sapiens OX=9606 GN=MXRA5 PE=1 SV=3	S	Function unknown	PREDICTED: matrix-remodeling-associated protein 5 [Pan paniscus]
X	3950000	29350000	loss	ENSG00000101868	[L]	Replication, recombination and repair	Biological Process: regulation of transcription involved in G1/S transition of mitotic cell cycle (GO:0000083);; Molecular Function: nucleotide binding (GO:0000166);; Biological Process: telomere maintenance via recombination (GO:0000722);; Biological Process: DNA synthesis involved in DNA repair (GO:0000731);; Cellular Component: chromatin (GO:0000785);; Molecular Function: nucleoside binding (G…	K02320|0|hsa:5422|K02320 DNA polymerase alpha subunit A [EC:2.7.7.7] | (RefSeq) POLA1, NSX, POLA, p180; DNA polymerase alpha 1, catalytic subunit	Pyrimidine metabolism (ko00240);; DNA replication (ko03030);; Purine metabolism (ko00230)	ko00230:Purine metabolism;ko00240:Pyrimidine metabolism;ko03030:DNA replication	[L]	Replication, recombination and repair	DNA polymerase family B;; DNA polymerase family B, exonuclease domain;; DNA Polymerase alpha zinc finger;; DNA polymerase alpha subunit p180 N terminal	DNA polymerase alpha catalytic subunit OS=Homo sapiens OX=9606 GN=POLA1 PE=1 SV=2	L	Replication, recombination and repair	DNA polymerase alpha catalytic subunit isoform 1 [Homo sapiens]
X	30050000	39050000	loss	ENSG00000198798	--	--	--	--	--	--	[S]	Function unknown	Melanoma associated antigen family N terminal;; MAGE family	Melanoma-associated antigen B3 OS=Homo sapiens OX=9606 GN=MAGEB3 PE=2 SV=2	S	Function unknown	melanoma-associated antigen B3 [Homo sapiens]
X	3950000	29350000	loss	ENSG00000177689	--	--	--	--	--	--	[S]	Function unknown	Melanoma associated antigen family N terminal;; MAGE family	Melanoma-associated antigen B10 OS=Homo sapiens OX=9606 GN=MAGEB10 PE=1 SV=4	S	Function unknown	melanoma-associated antigen B10 [Homo sapiens]
X	39100000	40950000	loss	ENSG00000183337	[D]	Cell cycle control, cell division, chromosome partitioning	Biological Process: negative regulation of transcription from RNA polymerase II promoter (GO:0000122);; Biological Process: negative regulation of histone H3-K36 methylation (GO:0000415);; Molecular Function: transcription corepressor activity (GO:0003714);; Molecular Function: ubiquitin-protein transferase activity (GO:0004842);; Cellular Component: mitochondrion (GO:0005739);; Biological Proces…	--	--	--	--	--	BCL-6 co-repressor, non-ankyrin-repeat region;; BCORL-PCGF1-binding domain;; Ankyrin repeats (3 copies);; Ankyrin repeat;; Ankyrin repeats (many copies);; Ankyrin repeats (many copies);; Ankyrin repeat	BCL-6 corepressor OS=Homo sapiens OX=9606 GN=BCOR PE=1 SV=1	S	Function unknown	BCL6 corepressor-cyclin B3 fusion protein [Homo sapiens]
X	30050000	39050000	loss	ENSG00000047597	--	--	Molecular Function: transporter activity (GO:0005215);; Molecular Function: protein binding (GO:0005515);; Cellular Component: plasma membrane (GO:0005886);; Biological Process: amino acid transport (GO:0006865);; Biological Process: cellular calcium ion homeostasis (GO:0006874);; Biological Process: regulation of cell size (GO:0008361);; Biological Process: cellular magnesium ion homeostasis (GO…	K19522|0|pps:100983067|K19522 membrane transport protein XK | (RefSeq) XK; X-linked Kx blood group	--		--	--	XK-related protein	Membrane transport protein XK OS=Homo sapiens OX=9606 GN=XK PE=1 SV=5	U	Intracellular trafficking, secretion, and vesicular transport	membrane transport protein XK precursor [Homo sapiens]
X	41000000	58450000	loss	ENSG00000189221	[E]	Amino acid transport and metabolism	Cellular Component: mitochondrial outer membrane (GO:0005741);; Molecular Function: primary amine oxidase activity (GO:0008131);; Cellular Component: integral component of membrane (GO:0016021);; Biological Process: neurotransmitter catabolic process (GO:0042135);; Biological Process: dopamine catabolic process (GO:0042420);; Biological Process: serotonin metabolic process (GO:0042428);; Biologic…	K00274|0|mcc:708371|K00274 monoamine oxidase [EC:1.4.3.4] | (RefSeq) MAOA; amine oxidase [flavin-containing] A	Arginine and proline metabolism (ko00330);; Histidine metabolism (ko00340);; Dopaminergic synapse (ko04728);; Glycine, serine and threonine metabolism (ko00260);; Tryptophan metabolism (ko00380);; Tyrosine metabolism (ko00350);; Amphetamine addiction (ko05031);; Drug metabolism - cytochrome P450 (ko00982);; Alcoholism (ko05034);; Serotonergic synapse (ko04726);; Cocaine addiction (ko05030);; Phen…	ko00340:Histidine metabolism;ko00350:Tyrosine metabolism;ko05034:Alcoholism;ko00380:Tryptophan metabolism;ko04726:Serotonergic synapse;ko00260:Glycine, serine and threonine metabolism;ko00360:Phenylalanine metabolism;ko00982:Drug metabolism - cytochrome P450;ko05031:Amphetamine addiction;ko00330:Arginine and proline metabolism;ko05030:Cocaine addiction;ko04728:Dopaminergic synapse	[Q]	Secondary metabolites biosynthesis, transport and catabolism	Flavin containing amine oxidoreductase	Amine oxidase [flavin-containing] A OS=Homo sapiens OX=9606 GN=MAOA PE=1 SV=1	S	Function unknown	PREDICTED: amine oxidase [flavin-containing] A [Pan troglodytes]
X	30050000	39050000	loss	ENSG00000198947	--	--	--	K10366|0|hsa:1756|K10366 dystrophin | (RefSeq) DMD, BMD, CMD3B, DXS142, DXS164, DXS206, DXS230, DXS239, DXS268, DXS269, DXS270, DXS272, MRX85; dystrophin	Arrhythmogenic right ventricular cardiomyopathy (ARVC) (ko05412);; Viral myocarditis (ko05416);; Hypertrophic cardiomyopathy (HCM) (ko05410);; Dilated cardiomyopathy (ko05414)	ko05414:Dilated cardiomyopathy;ko05410:Hypertrophic cardiomyopathy (HCM);ko05416:Viral myocarditis;ko05412:Arrhythmogenic right ventricular cardiomyopathy (ARVC)	[NTZ]	--	Spectrin repeat;; Calponin homology (CH) domain;; EF hand;; EF-hand;; Zinc finger, ZZ type;; WW domain;; CAMSAP CH domain	Dystrophin OS=Homo sapiens OX=9606 GN=DMD PE=1 SV=3	Z	Cytoskeleton	RecName: Full=Dystrophin
X	41000000	58450000	loss	ENSG00000183690	--	--	Molecular Function: calcium ion binding (GO:0005509);; Molecular Function: protein binding (GO:0005515);;	--	--	--	[S]	Function unknown	DUF1126 PH-like domain	EF-hand domain-containing family member C2 OS=Homo sapiens OX=9606 GN=EFHC2 PE=1 SV=2	S	Function unknown	EF-hand domain-containing family member C2 [Homo sapiens]
X	3950000	29350000	loss	ENSG00000102174	[O]	Posttranslational modification, protein turnover, chaperones	Biological Process: skeletal system development (GO:0001501);; Molecular Function: aminopeptidase activity (GO:0004177);; Molecular Function: metalloendopeptidase activity (GO:0004222);; Cellular Component: endoplasmic reticulum (GO:0005783);; Cellular Component: Golgi apparatus (GO:0005794);; Cellular Component: integral component of plasma membrane (GO:0005887);; Biological Process: cellular pr…	K08636|0|hsa:5251|K08636 phosphate-regulating neutral endopeptidase [EC:3.4.24.-] | (RefSeq) PHEX, HPDR, HPDR1, HYP, HYP1, LXHR, PEX, XLH; phosphate regulating endopeptidase homolog, X-linked	--		[E]	Amino acid transport and metabolism	Peptidase family M13;; Peptidase family M13	Phosphate-regulating neutral endopeptidase OS=Homo sapiens OX=9606 GN=PHEX PE=1 SV=1	O	Posttranslational modification, protein turnover, chaperones	phosphate-regulating neutral endopeptidase isoform 1 [Homo sapiens]
X	154150000	154300000	loss	ENSG00000268221	--	--	Biological Process: retinoid metabolic process (GO:0001523);; Cellular Component: integral component of plasma membrane (GO:0005887);; Biological Process: G-protein coupled receptor signaling pathway (GO:0007186);; Biological Process: visual perception (GO:0007601);; Biological Process: phototransduction (GO:0007602);; Molecular Function: G-protein coupled photoreceptor activity (GO:0008020);; Bi…	K04251|0|pon:100445186|K04251 long/medium wavelength-sensitive opsin | (RefSeq) OPN1MW; medium-wave-sensitive opsin 1	--		[R]	General function prediction only	7 transmembrane receptor (rhodopsin family);; Serpentine type 7TM GPCR chemoreceptor Srw;; Serpentine type 7TM GPCR chemoreceptor Srsx	Medium-wave-sensitive opsin 1 OS=Homo sapiens OX=9606 GN=OPN1MW PE=1 SV=1	U	Intracellular trafficking, secretion, and vesicular transport	hCG41347 [Homo sapiens]
X	30050000	39050000	loss	ENSG00000156298	--	--	--	K06571|1.06403e-179|chx:102174376|K06571 tetraspanin-7 | (RefSeq) TSPAN7; tetraspanin 7	Transcriptional misregulation in cancer (ko05202)	ko05202:Transcriptional misregulation in cancer	[R]	General function prediction only	Tetraspanin family	Tetraspanin-7 OS=Homo sapiens OX=9606 GN=TSPAN7 PE=1 SV=2	S	Function unknown	tetraspanin-7 [Homo sapiens]
X	3950000	29350000	loss	ENSG00000165182	--	--	--	--	--	--	--	--	--	Putative uncharacterized protein CXorf58 OS=Homo sapiens OX=9606 GN=CXorf58 PE=2 SV=2	S	Function unknown	putative uncharacterized protein CXorf58 isoform 1 [Homo sapiens]
X	30050000	39050000	loss	ENSG00000229674	--	--	Biological Process: DNA damage checkpoint (GO:0000077);; Cellular Component: nuclear chromosome (GO:0000228);; Cellular Component: chromosome, telomeric region (GO:0000781);; Cellular Component: chromatin (GO:0000785);; Molecular Function: DNA binding (GO:0003677);; Molecular Function: calcium ion binding (GO:0005509);; Molecular Function: calcium-dependent phospholipid binding (GO:0005544);; Cel…	K11251|1.02925e-43|pps:103786978|K11251 histone H2A | (RefSeq) histone H2A-Bbd type 1	Alcoholism (ko05034);; Systemic lupus erythematosus (ko05322)	ko05034:Alcoholism;ko05322:Systemic lupus erythematosus	[B]	Chromatin structure and dynamics	--	Histone H2A.J OS=Homo sapiens OX=9606 GN=H2AFJ PE=1 SV=1	B	Chromatin structure and dynamics	synaptotagmin-like 5, isoform CRA_c [Homo sapiens]
X	2800000	3850000	loss	ENSG00000205667	[P]	Inorganic ion transport and metabolism	Molecular Function: arylsulfatase activity (GO:0004065);; Cellular Component: endoplasmic reticulum lumen (GO:0005788);; Biological Process: glycosphingolipid metabolic process (GO:0006687);; Cellular Component: integral component of membrane (GO:0016021);; Biological Process: post-translational protein modification (GO:0043687);; Molecular Function: metal ion binding (GO:0046872);;	K12374|0|hsa:347527|K12374 arylsulfatase D/F/H [EC:3.1.6.-] | (RefSeq) ARSH, sulfatase; arylsulfatase family member H	--		[R]	General function prediction only	Sulfatase;; C-terminal region of aryl-sulfatase;; Type I phosphodiesterase / nucleotide pyrophosphatase	Arylsulfatase H OS=Homo sapiens OX=9606 GN=ARSH PE=2 SV=1	P	Inorganic ion transport and metabolism	arylsulfatase H [Homo sapiens]
X	3950000	29350000	loss	ENSG00000182287	--	--	Molecular Function: protein binding (GO:0005515);; Cellular Component: lysosomal membrane (GO:0005765);; Cellular Component: cytosol (GO:0005829);; Cellular Component: clathrin-coated pit (GO:0005905);; Biological Process: intracellular protein transport (GO:0006886);; Biological Process: visual learning (GO:0008542);; Molecular Function: protein transporter activity (GO:0008565);; Biological Pro…	K12394|2.75664e-98|rro:104657300|K12394 AP-1 complex subunit sigma 1/2 | (RefSeq) AP1S2; adaptor related protein complex 1 sigma 2 subunit	Lysosome (ko04142)	ko04142:Lysosome	[U]	Intracellular trafficking, secretion, and vesicular transport	Clathrin adaptor complex small chain	AP-1 complex subunit sigma-2 OS=Homo sapiens OX=9606 GN=AP1S2 PE=1 SV=1	U	Intracellular trafficking, secretion, and vesicular transport	PREDICTED: AP-1 complex subunit sigma-2 isoform X2 [Pan troglodytes]
X	3950000	29350000	loss	ENSG00000146938	[I]	Lipid transport and metabolism	Biological Process: brainstem development (GO:0003360);; Molecular Function: receptor activity (GO:0004872);; Cellular Component: extracellular space (GO:0005615);; Cellular Component: integral component of plasma membrane (GO:0005887);; Biological Process: neuron cell-cell adhesion (GO:0007158);; Biological Process: learning (GO:0007612);; Cellular Component: cell surface (GO:0009986);; Cellular…	K07378|0|ptr:465474|K07378 neuroligin | (RefSeq) NLGN4X; neuroligin 4, X-linked	Cell adhesion molecules (CAMs) (ko04514)	ko04514:Cell adhesion molecules (CAMs)	[R]	General function prediction only	Carboxylesterase family;; alpha/beta hydrolase fold	Neuroligin-4, X-linked OS=Homo sapiens OX=9606 GN=NLGN4X PE=1 SV=1	I	Lipid transport and metabolism	unnamed protein product [Homo sapiens]
X	3950000	29350000	loss	ENSG00000196664	[K]	Transcription	--	K05404|0|hsa:51284|K05404 toll-like receptor 7 | (RefSeq) TLR7, TLR7-like; toll like receptor 7	Influenza A (ko05164);; Toll-like receptor signaling pathway (ko04620);; Measles (ko05162)	ko05164:Influenza A;ko04620:Toll-like receptor signaling pathway;ko05162:Measles	[T]	Signal transduction mechanisms	Leucine rich repeat;; Leucine Rich repeats (2 copies);; Leucine rich repeats (6 copies);; TIR domain;; Leucine-rich repeat;; Leucine Rich Repeat	Toll-like receptor 7 OS=Homo sapiens OX=9606 GN=TLR7 PE=2 SV=1	S	Function unknown	toll-like receptor 7 precursor [Homo sapiens]
X	2800000	3850000	loss	ENSG00000062096	[P]	Inorganic ion transport and metabolism	Molecular Function: arylsulfatase activity (GO:0004065);; Cellular Component: endoplasmic reticulum lumen (GO:0005788);; Biological Process: glycosphingolipid metabolic process (GO:0006687);; Cellular Component: integral component of membrane (GO:0016021);; Biological Process: post-translational protein modification (GO:0043687);; Molecular Function: metal ion binding (GO:0046872);; Cellular Comp…	K12374|0|hsa:416|K12374 arylsulfatase D/F/H [EC:3.1.6.-] | (RefSeq) ARSF, ASF; arylsulfatase F	--		[R]	General function prediction only	Sulfatase;; C-terminal region of aryl-sulfatase;; Type I phosphodiesterase / nucleotide pyrophosphatase	Arylsulfatase F OS=Homo sapiens OX=9606 GN=ARSF PE=1 SV=4	P	Inorganic ion transport and metabolism	PREDICTED: arylsulfatase F isoform X1 [Homo sapiens]
X	3950000	29350000	loss	ENSG00000005302	--	--	Molecular Function: DNA binding (GO:0003677);; Biological Process: chromatin remodeling (GO:0006338);; Biological Process: chromatin silencing (GO:0006342);; Biological Process: histone deacetylation (GO:0016575);; Molecular Function: methylated histone binding (GO:0035064);; Cellular Component: NuA4 histone acetyltransferase complex (GO:0035267);; Biological Process: histone H2A acetylation (GO:…	K18403|4.42958e-121|ptr:465491|K18403 male-specific lethal 3 | (RefSeq) MSL3, MSL3L1; male-specific lethal 3 homolog (Drosophila)	--		[BK]	--	MRG;; RNA binding activity-knot of a chromodomain	Male-specific lethal 3 homolog OS=Homo sapiens OX=9606 GN=MSL3 PE=1 SV=1	K	Transcription	MSL3 isoform 9 [Pongo abelii]
X	3950000	29350000	loss	ENSG00000130741	[J]	Translation, ribosomal structure and biogenesis	Biological Process: formation of translation preinitiation complex (GO:0001731);; Molecular Function: translation initiation factor activity (GO:0003743);; Molecular Function: GTPase activity (GO:0003924);; Molecular Function: protein binding (GO:0005515);; Molecular Function: GTP binding (GO:0005525);; Cellular Component: nucleus (GO:0005634);; Cellular Component: cytosol (GO:0005829);; Biologic…	K03242|0|ocu:100344607|K03242 translation initiation factor 2 subunit 3 | (RefSeq) EIF2S3, EIF2G; eukaryotic translation initiation factor 2 subunit gamma	RNA transport (ko03013)	ko03013:RNA transport	[J]	Translation, ribosomal structure and biogenesis	Initiation factor eIF2 gamma, C terminal;; Elongation factor Tu GTP binding domain;; Elongation factor Tu domain 2	Eukaryotic translation initiation factor 2 subunit 3 OS=Homo sapiens OX=9606 GN=EIF2S3 PE=1 SV=3	J	Translation, ribosomal structure and biogenesis	eukaryotic translation initiation factor 2 subunit 3 [Carlito syrichta]
X	3950000	29350000	loss	ENSG00000165195	[M]	Cell wall/membrane/envelope biogenesis	--	K03857|2.79409e-158|hsa:5277|K03857 phosphatidylinositol glycan, class A [EC:2.4.1.198] | (RefSeq) PIGA, GPI3, MCAHS2, PIG-A, PNH1; phosphatidylinositol glycan anchor biosynthesis class A	Glycosylphosphatidylinositol(GPI)-anchor biosynthesis (ko00563)	ko00563:Glycosylphosphatidylinositol(GPI)-anchor biosynthesis	[MOI]	--	PIGA (GPI anchor biosynthesis);; Glycosyltransferase Family 4;; Glycosyl transferase 4-like domain	Phosphatidylinositol N-acetylglucosaminyltransferase subunit A OS=Homo sapiens OX=9606 GN=PIGA PE=1 SV=1	M	Cell wall/membrane/envelope biogenesis	PIGA isoform 11 [Pan troglodytes]
X	3950000	29350000	loss	ENSG00000123594	--	--	--	K11863|0|hsa:92552|K11863 Ataxin-3 [EC:3.4.22.-] | (RefSeq) ATXN3L, MJDL; ataxin 3 like	Protein processing in endoplasmic reticulum (ko04141)	ko04141:Protein processing in endoplasmic reticulum	[R]	General function prediction only	Josephin;; Unstructured region C-term to UIM in Ataxin3	Ataxin-3-like protein OS=Homo sapiens OX=9606 GN=ATXN3L PE=1 SV=2	O	Posttranslational modification, protein turnover, chaperones	ataxin-3-like protein [Homo sapiens]
X	3950000	29350000	loss	ENSG00000173698	--	--	Molecular Function: G-protein coupled receptor activity (GO:0004930);; Cellular Component: integral component of plasma membrane (GO:0005887);; Biological Process: cell surface receptor signaling pathway (GO:0007166);; Biological Process: G-protein coupled receptor signaling pathway (GO:0007186);; Biological Process: spermatogenesis (GO:0007283);; Cellular Component: cell surface (GO:0009986);; C…	K08451|0|hsa:10149|K08451 G protein-coupled receptor 64 | (RefSeq) ADGRG2, CBAVDX, EDDM6, GPR64, HE6, TM7LN2; adhesion G protein-coupled receptor G2	--		[T]	Signal transduction mechanisms	7 transmembrane receptor (Secretin family);; GPCR proteolysis site, GPS, motif	Adhesion G-protein coupled receptor G2 OS=Homo sapiens OX=9606 GN=ADGRG2 PE=1 SV=2	S	Function unknown	PREDICTED: adhesion G-protein coupled receptor G2 isoform X4 [Pan troglodytes]
X	3950000	29350000	loss	ENSG00000189186	[M]	Cell wall/membrane/envelope biogenesis	--	--	--	--	[R]	General function prediction only	WD domain, G-beta repeat	DDB1- and CUL4-associated factor 8-like protein 2 OS=Homo sapiens OX=9606 GN=DCAF8L2 PE=2 SV=2	S	Function unknown	DDB1- and CUL4-associated factor 8-like protein 2 [Homo sapiens]
X	3950000	29350000	loss	ENSG00000086717	[T]	Signal transduction mechanisms	--	K13807|0|hsa:5475|K13807 serine/threonine-protein phosphatase with EF-hands [EC:3.1.3.16] | (RefSeq) PPEF1, PP7, PPEF, PPP7C, PPP7CA; protein phosphatase with EF-hand domain 1	--		[T]	Signal transduction mechanisms	Calcineurin-like phosphoesterase;; EF-hand domain pair;; EF hand;; EF-hand domain pair;; EF-hand domain;; EF hand;; PPP5 TPR repeat region;; IQ calmodulin-binding motif	Serine/threonine-protein phosphatase with EF-hands 1 OS=Homo sapiens OX=9606 GN=PPEF1 PE=1 SV=1	T	Signal transduction mechanisms	serine/threonine-protein phosphatase with EF-hands 1 isoform 1 [Homo sapiens]
X	3950000	29350000	loss	ENSG00000130150	--	--	Cellular Component: integral component of membrane (GO:0016021);;	--	--	--	--	--	CRAL/TRIO domain;; MSP (Major sperm protein) domain	Motile sperm domain-containing protein 2 OS=Homo sapiens OX=9606 GN=MOSPD2 PE=1 SV=1	S	Function unknown	motile sperm domain-containing protein 2 isoform 1 [Homo sapiens]
X	41000000	58450000	loss	ENSG00000069509	[S]	Function unknown	Biological Process: autophagy of mitochondrion (GO:0000422);; Biological Process: response to hypoxia (GO:0001666);; Molecular Function: protein binding (GO:0005515);; Cellular Component: nucleus (GO:0005634);; Cellular Component: integral component of mitochondrial outer membrane (GO:0031307);;	K17986|1.10747e-97|ptr:740893|K17986 FUN14 domain-containing protein 1 | (RefSeq) FUNDC1; FUN14 domain containing 1	--		[S]	Function unknown	FUN14 family	FUN14 domain-containing protein 1 OS=Homo sapiens OX=9606 GN=FUNDC1 PE=1 SV=1	S	Function unknown	FUN14 domain-containing protein 1 [Homo sapiens]
X	3950000	29350000	loss	ENSG00000169059	--	--	--	--	--	--	--	--	Variable charge X/Y family	--	--	--	hCG1988454, isoform CRA_c, partial [Homo sapiens]
X	30050000	39050000	loss	ENSG00000198173	[Q]	Secondary metabolites biosynthesis, transport and catabolism	--	--	--	--	--	--	FAM47 family;; Formin Homology Region 1;; Domain of unknown function (DUF1610)	Putative protein FAM47C OS=Homo sapiens OX=9606 GN=FAM47C PE=2 SV=1	S	Function unknown	putative protein FAM47C [Homo sapiens]
X	154150000	154300000	loss	ENSG00000102076	--	--	Biological Process: retinoid metabolic process (GO:0001523);; Cellular Component: integral component of plasma membrane (GO:0005887);; Biological Process: G-protein coupled receptor signaling pathway (GO:0007186);; Biological Process: visual perception (GO:0007601);; Biological Process: phototransduction (GO:0007602);; Molecular Function: G-protein coupled photoreceptor activity (GO:0008020);; Bi…	K04251|0|ptr:741998|K04251 long/medium wavelength-sensitive opsin | (RefSeq) OPN1LW; opsin 1 (cone pigments), long-wave-sensitive	--		[R]	General function prediction only	7 transmembrane receptor (rhodopsin family);; Serpentine type 7TM GPCR chemoreceptor Srw	Long-wave-sensitive opsin 1 OS=Homo sapiens OX=9606 GN=OPN1LW PE=1 SV=1	U	Intracellular trafficking, secretion, and vesicular transport	PREDICTED: long-wave-sensitive opsin 1 [Chlorocebus sabaeus]
X	3950000	29350000	loss	ENSG00000169933	--	--	--	--	--	--	[R]	General function prediction only	FERM central domain;; PDZ domain (Also known as DHR or GLGF)	FERM and PDZ domain-containing protein 4 OS=Homo sapiens OX=9606 GN=FRMPD4 PE=1 SV=1	S	Function unknown	FERM and PDZ domain-containing protein 4 [Homo sapiens]
X	3950000	29350000	loss	ENSG00000198759	--	--	--	--	--	--	[T]	Signal transduction mechanisms	Calcium-binding EGF domain;; MAM domain, meprin/A5/mu;; Complement Clr-like EGF-like;; Coagulation Factor Xa inhibitory site;; EGF domain;; EGF-like domain;; MSP1 EGF domain 1	Epidermal growth factor-like protein 6 OS=Homo sapiens OX=9606 GN=EGFL6 PE=2 SV=1	U	Intracellular trafficking, secretion, and vesicular transport	epidermal growth factor-like protein 6 isoform 1 precursor [Homo sapiens]
X	3950000	29350000	loss	ENSG00000224960	--	--	--	K17491|0|pps:100970683|K17491 protein phosphatase 4 regulatory subunit 3 | (RefSeq) putative SMEK homolog 3	Glucagon signaling pathway (ko04922)	ko04922:Glucagon signaling pathway	[G]	Carbohydrate transport and metabolism	Component of IIS longevity pathway SMK-1	Protein PPP4R3C OS=Homo sapiens OX=9606 GN=PPP4R3C PE=2 SV=3	S	Function unknown	protein PPP4R3C [Homo sapiens]
X	3950000	29350000	loss	ENSG00000102098	--	--	Molecular Function: DNA binding (GO:0003677);; Molecular Function: transcription factor activity, sequence-specific DNA binding (GO:0003700);; Biological Process: regulation of transcription, DNA-templated (GO:0006355);; Biological Process: anatomical structure morphogenesis (GO:0009653);; Cellular Component: PcG protein complex (GO:0031519);;	K11465|0|hsa:10389|K11465 sex comb on midleg-like protein 2 | (RefSeq) SCML2; sex comb on midleg-like 2 (Drosophila)	--		[K]	Transcription	mbt repeat;; SLED domain;; SAM domain (Sterile alpha motif);; RNA binding Region;; Sterile alpha motif (SAM)/Pointed domain	Sex comb on midleg-like protein 2 OS=Homo sapiens OX=9606 GN=SCML2 PE=1 SV=1	S	Function unknown	SCML2 protein, partial [Homo sapiens]
X	41000000	58450000	loss	ENSG00000102225	[T]	Signal transduction mechanisms	Molecular Function: cyclin-dependent protein serine/threonine kinase activity (GO:0004693);; Molecular Function: protein binding (GO:0005515);; Molecular Function: ATP binding (GO:0005524);; Biological Process: protein phosphorylation (GO:0006468);; Biological Process: exocytosis (GO:0006887);; Biological Process: spermatogenesis (GO:0007283);; Cellular Component: synaptic vesicle (GO:0008021);; …	K08820|0|ptr:465602|K08820 cyclin-dependent kinase 16 [EC:2.7.11.22] | (RefSeq) CDK16, PCTK1; cyclin dependent kinase 16	--		[R]	General function prediction only	Protein kinase domain;; Protein tyrosine kinase;; Haspin like kinase domain;; Kinase-like	Cyclin-dependent kinase 16 OS=Homo sapiens OX=9606 GN=CDK16 PE=1 SV=1	T	Signal transduction mechanisms	cyclin-dependent kinase 16 isoform 2 [Homo sapiens]
X	3950000	29350000	loss	ENSG00000196459	--	--	--	K20301|1.40784e-115|nle:100594086|K20301 trafficking protein particle complex subunit 2 | (RefSeq) TRAPPC2; trafficking protein particle complex 2	--		[U]	Intracellular trafficking, secretion, and vesicular transport	Sedlin, N-terminal conserved region;; Sybindin-like family	Trafficking protein particle complex subunit 2B OS=Homo sapiens OX=9606 GN=TRAPPC2B PE=1 SV=1	U	Intracellular trafficking, secretion, and vesicular transport	trafficking protein particle complex subunit 2 isoform X1 [Pongo abelii]
Y	0	9300000	loss	ENSG00000184895	--	--	Biological Process: negative regulation of transcription from RNA polymerase II promoter (GO:0000122);; Molecular Function: transcription factor activity, RNA polymerase II distal enhancer sequence-specific binding (GO:0003705);; Molecular Function: calmodulin binding (GO:0005516);; Cellular Component: cytoplasm (GO:0005737);; Molecular Function: transcription factor binding (GO:0008134);; Molecu…	K09266|1.48224e-150|hsa:6736|K09266 sex-determining region Y protein (SOX group A) | (RefSeq) SRY, SRXX1, SRXY1, TDF, TDY; sex determining region Y	--		[K]	Transcription	HMG (high mobility group) box;; HMG-box domain	Sex-determining region Y protein OS=Homo sapiens OX=9606 GN=SRY PE=1 SV=1	B	Chromatin structure and dynamics	RecName: Full=Sex-determining region Y protein; AltName: Full=Testis-determining factor
Y	12400000	17100000	loss	ENSG00000129864	--	--	--	--	--	--	--	--	Variable charge X/Y family	Testis-specific basic protein Y 1 OS=Homo sapiens OX=9606 GN=VCY PE=2 SV=1	--	--	hCG1988454, isoform CRA_c, partial [Homo sapiens]
Y	22550000	57227415	loss	ENSG00000205944	--	--	Molecular Function: nucleotide binding (GO:0000166);; Molecular Function: RNA binding (GO:0003723);; Molecular Function: protein binding (GO:0005515);; Cellular Component: nucleus (GO:0005634);; Cellular Component: cytoplasm (GO:0005737);; Biological Process: multicellular organism development (GO:0007275);; Biological Process: spermatogenesis (GO:0007283);; Biological Process: single fertilizati…	--	--	--	[R]	General function prediction only	RNA recognition motif. (a.k.a. RRM, RBD, or RNP domain)	Deleted in azoospermia protein 2 OS=Homo sapiens OX=9606 GN=DAZ2 PE=1 SV=3	S	Function unknown	unnamed protein product [Homo sapiens]
Y	22550000	57227415	loss	ENSG00000187191	--	--	Molecular Function: nucleotide binding (GO:0000166);; Molecular Function: RNA binding (GO:0003723);; Molecular Function: protein binding (GO:0005515);; Cellular Component: nucleus (GO:0005634);; Cellular Component: cytoplasm (GO:0005737);; Biological Process: multicellular organism development (GO:0007275);; Biological Process: spermatogenesis (GO:0007283);; Biological Process: single fertilizati…	--	--	--	[R]	General function prediction only	RNA recognition motif. (a.k.a. RRM, RBD, or RNP domain)	Deleted in azoospermia protein 3 OS=Homo sapiens OX=9606 GN=DAZ3 PE=1 SV=1	S	Function unknown	deleted in azoospermia protein 3 [Homo sapiens]
Y	12400000	17100000	loss	ENSG00000154620	--	--	--	K05764|6.07071e-19|hsa:9087|K05764 thymosin, beta 4 | (RefSeq) TMSB4Y, TB4Y; thymosin beta 4, Y-linked	Regulation of actin cytoskeleton (ko04810)	ko04810:Regulation of actin cytoskeleton	[N]	Cell motility	--	Thymosin beta-4, Y-chromosomal OS=Homo sapiens OX=9606 GN=TMSB4Y PE=1 SV=3	O	Posttranslational modification, protein turnover, chaperones	thymosin, beta 4, Y-linked, partial [Homo sapiens]
Y	12400000	17100000	loss	ENSG00000183878	[R]	General function prediction only	--	K11447|0|mcc:100270704|K11447 histone demethylase [EC:1.14.11.-] | (RefSeq) UTY; ubiquitously transcribed tetratricopeptide repeat containing, Y-linked	Transcriptional misregulation in cancer (ko05202)	ko05202:Transcriptional misregulation in cancer	[R]	General function prediction only	JmjC domain, hydroxylase;; Tetratricopeptide repeat;; Tetratricopeptide repeat;; Tetratricopeptide repeat;; Tetratricopeptide repeat;; Tetratricopeptide repeat;; Tetratricopeptide repeat;; Tetratricopeptide repeat;; Tetratricopeptide repeat	Lysine-specific demethylase 6A OS=Homo sapiens OX=9606 GN=KDM6A PE=1 SV=2	S	Function unknown	histone demethylase UTY isoform 4 [Homo sapiens]
Y	22550000	57227415	loss	ENSG00000172352	[I]	Lipid transport and metabolism	Molecular Function: histone acetyltransferase activity (GO:0004402);; Cellular Component: nucleus (GO:0005634);; Biological Process: spermatogenesis (GO:0007283);; Biological Process: histone acetylation (GO:0016573);; Molecular Function: methylated histone binding (GO:0035064);;	K00653|0|hsa:253175|K00653 chromodomain protein Y [EC:2.3.1.48] | (RefSeq) CDY1B, CDY; chromodomain Y-linked 1B	--		[I]	Lipid transport and metabolism	Enoyl-CoA hydratase/isomerase;; Enoyl-CoA hydratase/isomerase;; Chromo (CHRromatin Organisation MOdifier) domain	Testis-specific chromodomain protein Y 1 OS=Homo sapiens OX=9606 GN=CDY1 PE=1 SV=1	I	Lipid transport and metabolism	testis-specific chromodomain protein Y 1 isoform b [Homo sapiens]
Y	17100000	22550000	loss	ENSG00000234414	[J]	Translation, ribosomal structure and biogenesis	Molecular Function: nucleotide binding (GO:0000166);; Biological Process: regulation of alternative mRNA splicing, via spliceosome (GO:0000381);; Molecular Function: mRNA binding (GO:0003729);; Molecular Function: protein binding (GO:0005515);; Cellular Component: nucleus (GO:0005634);; Biological Process: spermatogenesis (GO:0007283);; Biological Process: male gonad development (GO:0008584);;	--	--	--	--	--	RBM1CTR (NUC064) family;; RNA recognition motif. (a.k.a. RRM, RBD, or RNP domain)	RNA-binding motif protein, Y chromosome, family 1 member A1 OS=Homo sapiens OX=9606 GN=RBMY1A1 PE=1 SV=1	K	Transcription	RNA-binding motif protein, Y chromosome, family 1 member A1 isoform 1 [Homo sapiens]
Y	0	9300000	loss	ENSG00000099721	--	--	--	--	--	--	--	--	Amelogenin	Amelogenin, Y isoform OS=Homo sapiens OX=9606 GN=AMELY PE=2 SV=2	O	Posttranslational modification, protein turnover, chaperones	amelogenin, Y isoform precursor [Homo sapiens]
Y	17100000	22550000	loss	ENSG00000169789	--	--	--	--	--	--	--	--	--	PTPN13-like protein, Y-linked OS=Homo sapiens OX=9606 GN=PRY PE=1 SV=2	S	Function unknown	PTPN13-like protein, Y-linked [Homo sapiens]
Y	17100000	22550000	loss	ENSG00000183146	--	--	Molecular Function: G-protein coupled receptor activity (GO:0004930);; Molecular Function: olfactory receptor activity (GO:0004984);; Cellular Component: plasma membrane (GO:0005886);; Biological Process: G-protein coupled receptor signaling pathway (GO:0007186);; Cellular Component: integral component of membrane (GO:0016021);; Biological Process: detection of chemical stimulus involved in senso…	--	--	--	--	--	Protein of unknown function (DUF1725)	Proline-rich protein, Y-linked OS=Homo sapiens OX=9606 GN=PRORY PE=2 SV=1	S	Function unknown	proline-rich protein, Y-linked [Homo sapiens]
Y	17100000	22550000	loss	ENSG00000244395	[J]	Translation, ribosomal structure and biogenesis	Molecular Function: nucleotide binding (GO:0000166);; Biological Process: regulation of alternative mRNA splicing, via spliceosome (GO:0000381);; Molecular Function: mRNA binding (GO:0003729);; Molecular Function: protein binding (GO:0005515);; Cellular Component: nucleus (GO:0005634);; Biological Process: spermatogenesis (GO:0007283);; Biological Process: male gonad development (GO:0008584);;	--	--	--	--	--	RBM1CTR (NUC064) family;; RNA recognition motif. (a.k.a. RRM, RBD, or RNP domain)	RNA-binding motif protein, Y chromosome, family 1 member D OS=Homo sapiens OX=9606 GN=RBMY1D PE=2 SV=1	K	Transcription	RNA-binding motif protein, Y chromosome, family 1 member D isoform 1 [Homo sapiens]
Y	12400000	17100000	loss	ENSG00000165246	[I]	Lipid transport and metabolism	--	K07378|0|ptr:449030|K07378 neuroligin | (RefSeq) NLGN4Y; neuroligin 4, Y-linked	Cell adhesion molecules (CAMs) (ko04514)	ko04514:Cell adhesion molecules (CAMs)	[R]	General function prediction only	Carboxylesterase family;; alpha/beta hydrolase fold	Neuroligin-4, Y-linked OS=Homo sapiens OX=9606 GN=NLGN4Y PE=2 SV=1	I	Lipid transport and metabolism	PREDICTED: neuroligin-4, Y-linked isoform X1 [Homo sapiens]
Y	0	9300000	loss	ENSG00000067646	--	--	Molecular Function: RNA polymerase II regulatory region sequence-specific DNA binding (GO:0000977);; Molecular Function: transcription factor activity, sequence-specific DNA binding (GO:0003700);; Cellular Component: nucleus (GO:0005634);; Biological Process: regulation of transcription, DNA-templated (GO:0006355);; Biological Process: multicellular organism development (GO:0007275);; Molecular F…	--	--	--	[R]	General function prediction only	Zfx / Zfy transcription activation region;; Zinc finger, C2H2 type;; Zinc-finger double domain;; C2H2-type zinc finger;; C2H2-type zinc-finger domain;; Zinc-finger double-stranded RNA-binding;; zinc-ribbon family	Zinc finger Y-chromosomal protein OS=Homo sapiens OX=9606 GN=ZFY PE=1 SV=3	S	Function unknown	zinc finger Y-chromosomal protein isoform 1 [Homo sapiens]
Y	22550000	57227415	loss	ENSG00000183753	--	--	Cellular Component: nucleus (GO:0005634);; Biological Process: spermatogenesis (GO:0007283);; Biological Process: single fertilization (GO:0007338);; Molecular Function: HECT domain binding (GO:0032399);;	--	--	--	--	--	--	Testis-specific basic protein Y 2 OS=Homo sapiens OX=9606 GN=BPY2 PE=1 SV=2	O	Posttranslational modification, protein turnover, chaperones	testis-specific basic protein Y 2 [Homo sapiens]
Y	17100000	22550000	loss	ENSG00000198692	[J]	Translation, ribosomal structure and biogenesis	--	K03236|8.2679e-62|fpg:101914848|K03236 translation initiation factor 1A | (RefSeq) EIF1AX; eukaryotic translation initiation factor 1A, X-linked	RNA transport (ko03013)	ko03013:RNA transport	[J]	Translation, ribosomal structure and biogenesis	Translation initiation factor 1A / IF-1	Eukaryotic translation initiation factor 1A, Y-chromosomal OS=Homo sapiens OX=9606 GN=EIF1AY PE=1 SV=4	J	Translation, ribosomal structure and biogenesis	eukaryotic translation initiation factor 1A, Y-chromosomal [Pan troglodytes]
Y	17100000	22550000	loss	ENSG00000226941	[J]	Translation, ribosomal structure and biogenesis	Molecular Function: nucleotide binding (GO:0000166);; Biological Process: regulation of alternative mRNA splicing, via spliceosome (GO:0000381);; Molecular Function: mRNA binding (GO:0003729);; Molecular Function: protein binding (GO:0005515);; Cellular Component: nucleus (GO:0005634);; Biological Process: spermatogenesis (GO:0007283);; Biological Process: male gonad development (GO:0008584);;	--	--	--	--	--	RBM1CTR (NUC064) family;; RNA recognition motif. (a.k.a. RRM, RBD, or RNP domain)	RNA-binding motif protein, Y chromosome, family 1 member F/J OS=Homo sapiens OX=9606 GN=RBMY1F PE=1 SV=2	K	Transcription	RNA-binding motif protein, Y chromosome, family 1 member F/J isoform 1 [Homo sapiens]
Y	22550000	57227415	loss	ENSG00000205916	--	--	Molecular Function: nucleotide binding (GO:0000166);; Molecular Function: RNA binding (GO:0003723);; Molecular Function: protein binding (GO:0005515);; Cellular Component: nucleus (GO:0005634);; Cellular Component: cytoplasm (GO:0005737);; Biological Process: multicellular organism development (GO:0007275);; Biological Process: spermatogenesis (GO:0007283);; Biological Process: single fertilizati…	--	--	--	[R]	General function prediction only	RNA recognition motif. (a.k.a. RRM, RBD, or RNP domain);; RNA recognition motif;; RNA recognition motif. (a.k.a. RRM, RBD, or RNP domain)	Deleted in azoospermia protein 4 OS=Homo sapiens OX=9606 GN=DAZ4 PE=1 SV=2	S	Function unknown	deleted in azoospermia protein 4 isoform 1 [Homo sapiens]
Y	17100000	22550000	loss	ENSG00000129873	[I]	Lipid transport and metabolism	Molecular Function: histone acetyltransferase activity (GO:0004402);; Cellular Component: nucleus (GO:0005634);; Biological Process: spermatogenesis (GO:0007283);; Biological Process: histone acetylation (GO:0016573);; Molecular Function: methylated histone binding (GO:0035064);;	K00653|0|hsa:203611|K00653 chromodomain protein Y [EC:2.3.1.48] | (RefSeq) CDY2B, CDY; chromodomain Y-linked 2B	--		[I]	Lipid transport and metabolism	Enoyl-CoA hydratase/isomerase;; Enoyl-CoA hydratase/isomerase;; Chromo (CHRromatin Organisation MOdifier) domain	Testis-specific chromodomain protein Y 2 OS=Homo sapiens OX=9606 GN=CDY2A PE=1 SV=1	I	Lipid transport and metabolism	PREDICTED: LOW QUALITY PROTEIN: testis-specific chromodomain protein Y 1 [Pan troglodytes]
Y	22550000	57227415	loss	ENSG00000172288	[I]	Lipid transport and metabolism	Molecular Function: histone acetyltransferase activity (GO:0004402);; Cellular Component: nucleus (GO:0005634);; Biological Process: spermatogenesis (GO:0007283);; Biological Process: histone acetylation (GO:0016573);; Molecular Function: methylated histone binding (GO:0035064);;	K00653|0|hsa:253175|K00653 chromodomain protein Y [EC:2.3.1.48] | (RefSeq) CDY1B, CDY; chromodomain Y-linked 1B	--		[I]	Lipid transport and metabolism	Enoyl-CoA hydratase/isomerase;; Enoyl-CoA hydratase/isomerase;; Chromo (CHRromatin Organisation MOdifier) domain	Testis-specific chromodomain protein Y 1 OS=Homo sapiens OX=9606 GN=CDY1 PE=1 SV=1	I	Lipid transport and metabolism	testis-specific chromodomain protein Y 1 isoform b [Homo sapiens]
Y	12400000	17100000	loss	ENSG00000114374	--	--	--	K11840|0|hsa:8287|K11840 ubiquitin carboxyl-terminal hydrolase 9/24 [EC:3.4.19.12] | (RefSeq) USP9Y, DFFRY, SPGFY2; ubiquitin specific peptidase 9, Y-linked	--		[O]	Posttranslational modification, protein turnover, chaperones	Ubiquitin carboxyl-terminal hydrolase;; Ubiquitin carboxyl-terminal hydrolase	Probable ubiquitin carboxyl-terminal hydrolase FAF-Y OS=Homo sapiens OX=9606 GN=USP9Y PE=2 SV=2	O	Posttranslational modification, protein turnover, chaperones	probable ubiquitin carboxyl-terminal hydrolase FAF-Y [Homo sapiens]
Y	12400000	17100000	loss	ENSG00000129862	--	--	--	--	--	--	--	--	Variable charge X/Y family	Testis-specific basic protein Y 1 OS=Homo sapiens OX=9606 GN=VCY PE=2 SV=1	--	--	hCG1988454, isoform CRA_c, partial [Homo sapiens]
Y	0	9300000	loss	ENSG00000129824	[J]	Translation, ribosomal structure and biogenesis	Biological Process: nuclear-transcribed mRNA catabolic process, nonsense-mediated decay (GO:0000184);; Molecular Function: structural constituent of ribosome (GO:0003735);; Cellular Component: nucleoplasm (GO:0005654);; Cellular Component: polysome (GO:0005844);; Cellular Component: focal adhesion (GO:0005925);; Biological Process: rRNA processing (GO:0006364);; Biological Process: translational …	K02987|0|hsa:6192|K02987 small subunit ribosomal protein S4e | (RefSeq) RPS4Y1, RPS4Y, S4; ribosomal protein S4, Y-linked 1	Ribosome (ko03010)	ko03010:Ribosome	[J]	Translation, ribosomal structure and biogenesis	Ribosomal family S4e;; 40S ribosomal protein S4 C-terminus;; RS4NT (NUC023) domain;; KOW motif;; S4 domain	40S ribosomal protein S4, Y isoform 1 OS=Homo sapiens OX=9606 GN=RPS4Y1 PE=1 SV=2	J	Translation, ribosomal structure and biogenesis	40S ribosomal protein S4, Y isoform 1 [Homo sapiens]
Y	0	9300000	loss	ENSG00000168757	--	--	--	--	--	--	[L]	Replication, recombination and repair	Nucleosome assembly protein (NAP)	Testis-specific Y-encoded protein 2 OS=Homo sapiens OX=9606 GN=TSPY2 PE=3 SV=1	S	Function unknown	testis-specific Y-encoded protein 2 [Homo sapiens]
Y	17100000	22550000	loss	ENSG00000242875	[J]	Translation, ribosomal structure and biogenesis	Molecular Function: nucleotide binding (GO:0000166);; Biological Process: regulation of alternative mRNA splicing, via spliceosome (GO:0000381);; Molecular Function: mRNA binding (GO:0003729);; Molecular Function: protein binding (GO:0005515);; Cellular Component: nucleus (GO:0005634);; Biological Process: spermatogenesis (GO:0007283);; Biological Process: male gonad development (GO:0008584);;	--	--	--	--	--	RBM1CTR (NUC064) family;; RNA recognition motif. (a.k.a. RRM, RBD, or RNP domain)	RNA-binding motif protein, Y chromosome, family 1 member B OS=Homo sapiens OX=9606 GN=RBMY1B PE=2 SV=2	K	Transcription	RNA-binding motif protein, Y chromosome, family 1 member B isoform 1 [Homo sapiens]
Y	17100000	22550000	loss	ENSG00000182415	[I]	Lipid transport and metabolism	Molecular Function: histone acetyltransferase activity (GO:0004402);; Cellular Component: nucleus (GO:0005634);; Biological Process: spermatogenesis (GO:0007283);; Biological Process: histone acetylation (GO:0016573);; Molecular Function: methylated histone binding (GO:0035064);;	K00653|0|hsa:203611|K00653 chromodomain protein Y [EC:2.3.1.48] | (RefSeq) CDY2B, CDY; chromodomain Y-linked 2B	--		[I]	Lipid transport and metabolism	Enoyl-CoA hydratase/isomerase;; Enoyl-CoA hydratase/isomerase;; Chromo (CHRromatin Organisation MOdifier) domain	Testis-specific chromodomain protein Y 2 OS=Homo sapiens OX=9606 GN=CDY2A PE=1 SV=1	I	Lipid transport and metabolism	PREDICTED: LOW QUALITY PROTEIN: testis-specific chromodomain protein Y 1 [Pan troglodytes]
Y	17100000	22550000	loss	ENSG00000172468	--	--	Molecular Function: transcription factor activity, sequence-specific DNA binding (GO:0003700);; Molecular Function: protein binding (GO:0005515);; Cellular Component: nucleus (GO:0005634);; Cellular Component: cytoplasm (GO:0005737);; Biological Process: regulation of transcription, DNA-templated (GO:0006355);; Molecular Function: sequence-specific DNA binding (GO:0043565);;	--	--	--	[K]	Transcription	HSF-type DNA-binding	Heat shock transcription factor, Y-linked OS=Homo sapiens OX=9606 GN=HSFY1 PE=1 SV=1	K	Transcription	PREDICTED: heat shock transcription factor, Y-linked isoform X3 [Homo sapiens]
Y	22550000	57227415	loss	ENSG00000183795	--	--	--	--	--	--	--	--	--	Testis-specific basic protein Y 2 OS=Homo sapiens OX=9606 GN=BPY2 PE=1 SV=2	O	Posttranslational modification, protein turnover, chaperones	testis-specific basic protein Y 2 [Homo sapiens]
Y	22550000	57227415	loss	ENSG00000185894	--	--	Cellular Component: nucleus (GO:0005634);; Biological Process: spermatogenesis (GO:0007283);; Biological Process: single fertilization (GO:0007338);; Molecular Function: HECT domain binding (GO:0032399);;	--	--	--	--	--	--	Testis-specific basic protein Y 2 OS=Homo sapiens OX=9606 GN=BPY2 PE=1 SV=2	O	Posttranslational modification, protein turnover, chaperones	testis-specific basic protein Y 2 [Homo sapiens]
Y	17100000	22550000	loss	ENSG00000169807	--	--	--	--	--	--	--	--	--	PTPN13-like protein, Y-linked OS=Homo sapiens OX=9606 GN=PRY PE=1 SV=2	S	Function unknown	PTPN13-like protein, Y-linked [Homo sapiens]
Y	0	9300000	loss	ENSG00000092377	[T]	Signal transduction mechanisms	--	K04508|0|hsa:90665|K04508 transducin (beta)-like 1 | (RefSeq) TBL1Y, TBL1; transducin beta like 1, Y-linked	Wnt signaling pathway (ko04310)	ko04310:Wnt signaling pathway	[B]	Chromatin structure and dynamics	WD domain, G-beta repeat;; Anaphase-promoting complex subunit 4 WD40 domain;; Eukaryotic translation initiation factor eIF2A;; LisH	F-box-like/WD repeat-containing protein TBL1Y OS=Homo sapiens OX=9606 GN=TBL1Y PE=2 SV=1	S	Function unknown	F-box-like/WD repeat-containing protein TBL1Y [Homo sapiens]
Y	17100000	22550000	loss	ENSG00000242389	[J]	Translation, ribosomal structure and biogenesis	Molecular Function: nucleotide binding (GO:0000166);; Biological Process: regulation of alternative mRNA splicing, via spliceosome (GO:0000381);; Molecular Function: mRNA binding (GO:0003729);; Molecular Function: protein binding (GO:0005515);; Cellular Component: nucleus (GO:0005634);; Biological Process: spermatogenesis (GO:0007283);; Biological Process: male gonad development (GO:0008584);;	--	--	--	--	--	RBM1CTR (NUC064) family;; RNA recognition motif. (a.k.a. RRM, RBD, or RNP domain)	RNA-binding motif protein, Y chromosome, family 1 member E OS=Homo sapiens OX=9606 GN=RBMY1E PE=2 SV=1	K	Transcription	RNA-binding motif protein, Y chromosome, family 1 member E [Homo sapiens]
Y	17100000	22550000	loss	ENSG00000169953	--	--	--	--	--	--	[K]	Transcription	HSF-type DNA-binding	Heat shock transcription factor, Y-linked OS=Homo sapiens OX=9606 GN=HSFY1 PE=1 SV=1	K	Transcription	heat shock transcription factor, Y-linked isoform 1 [Homo sapiens]
Y	17100000	22550000	loss	ENSG00000169800	[J]	Translation, ribosomal structure and biogenesis	--	--	--	--	--	--	RBM1CTR (NUC064) family;; RNA recognition motif. (a.k.a. RRM, RBD, or RNP domain)	RNA-binding motif protein, Y chromosome, family 1 member F/J OS=Homo sapiens OX=9606 GN=RBMY1F PE=1 SV=2	K	Transcription	RNA-binding motif protein, Y chromosome, family 1 member F/J isoform 1 [Homo sapiens]
Y	0	9300000	loss	ENSG00000176679	--	--	Molecular Function: DNA binding (GO:0003677);; Molecular Function: protein binding (GO:0005515);; Cellular Component: nucleus (GO:0005634);; Biological Process: regulation of transcription, DNA-templated (GO:0006355);;	K19554|2.03297e-133|hsa:90655|K19554 homeobox protein TGIF2L | (RefSeq) TGIF2LY, TGIFLY; TGFB induced factor homeobox 2 like, Y-linked	--		[K]	Transcription	Homeobox KN domain;; Homeobox domain	Homeobox protein TGIF2LY OS=Homo sapiens OX=9606 GN=TGIF2LY PE=1 SV=1	K	Transcription	homeobox protein TGIF2LY [Homo sapiens]
Y	17100000	22550000	loss	ENSG00000280969	[J]	Translation, ribosomal structure and biogenesis	Biological Process: nuclear-transcribed mRNA catabolic process, nonsense-mediated decay (GO:0000184);; Molecular Function: structural constituent of ribosome (GO:0003735);; Cellular Component: nucleoplasm (GO:0005654);; Cellular Component: polysome (GO:0005844);; Cellular Component: focal adhesion (GO:0005925);; Biological Process: rRNA processing (GO:0006364);; Biological Process: translational …	K02987|0|hsa:140032|K02987 small subunit ribosomal protein S4e | (RefSeq) RPS4Y2, RPS4Y2P; ribosomal protein S4, Y-linked 2	Ribosome (ko03010)	ko03010:Ribosome	[J]	Translation, ribosomal structure and biogenesis	Ribosomal family S4e;; 40S ribosomal protein S4 C-terminus;; RS4NT (NUC023) domain;; KOW motif	40S ribosomal protein S4, Y isoform 2 OS=Homo sapiens OX=9606 GN=RPS4Y2 PE=2 SV=3	J	Translation, ribosomal structure and biogenesis	40S ribosomal protein S4, Y isoform 2 [Homo sapiens]
Y	17100000	22550000	loss	ENSG00000012817	--	--	--	K11446|0|hsa:8284|K11446 histone demethylase JARID1 [EC:1.14.11.-] | (RefSeq) KDM5D, HY, HYA, JARID1D, SMCY; lysine demethylase 5D	--		[R]	General function prediction only	PLU-1-like protein;; JmjC domain, hydroxylase;; ARID/BRIGHT DNA binding domain;; jmjN domain;; C5HC2 zinc finger;; PHD-finger	Lysine-specific demethylase 5D OS=Homo sapiens OX=9606 GN=KDM5D PE=1 SV=2	S	Function unknown	lysine-specific demethylase 5D isoform 1 [Homo sapiens]
Y	0	9300000	loss	ENSG00000099715	[U]	Intracellular trafficking, secretion, and vesicular transport	--	K16498|0|hsa:83259|K16498 protocadherin delta 1 | (RefSeq) PCDH11Y, PCDH-PC, PCDH22, PCDHX, PCDHY; protocadherin 11 Y-linked	--		--	--	Cadherin domain;; Protocadherin;; Cadherin-like;; Cadherin-like	Protocadherin-11 Y-linked OS=Homo sapiens OX=9606 GN=PCDH11Y PE=1 SV=1	U	Intracellular trafficking, secretion, and vesicular transport	protocadherin-11 Y-linked isoform c precursor [Homo sapiens]
Y	22550000	57227415	loss	ENSG00000188120	--	--	Molecular Function: nucleotide binding (GO:0000166);; Molecular Function: RNA binding (GO:0003723);; Molecular Function: protein binding (GO:0005515);; Cellular Component: nucleus (GO:0005634);; Cellular Component: cytoplasm (GO:0005737);; Biological Process: multicellular organism development (GO:0007275);; Biological Process: spermatogenesis (GO:0007283);; Biological Process: single fertilizati…	--	--	--	[R]	General function prediction only	RNA recognition motif. (a.k.a. RRM, RBD, or RNP domain);; RNA recognition motif;; RNA recognition motif. (a.k.a. RRM, RBD, or RNP domain)	Deleted in azoospermia protein 1 OS=Homo sapiens OX=9606 GN=DAZ1 PE=1 SV=2	S	Function unknown	deleted in azoospermia protein 1 [Homo sapiens]
Y	12400000	17100000	loss	ENSG00000067048	[L]	Replication, recombination and repair	--	K17642|0|hsa:8653|K17642 ATP-dependent RNA helicase DDX3Y [EC:3.6.4.13] | (RefSeq) DDX3Y, DBY; DEAD-box helicase 3, Y-linked	--		[A]	RNA processing and modification	DEAD/DEAH box helicase;; Helicase conserved C-terminal domain	ATP-dependent RNA helicase DDX3Y OS=Homo sapiens OX=9606 GN=DDX3Y PE=1 SV=2	L	Replication, recombination and repair	ATP-dependent RNA helicase DDX3Y isoform 1 [Homo sapiens]
