# Supplementary material for: The 3D genome of plasma cells in multiple myeloma
Source: Research Square preprint supplement (doi:10.21203/rs.3.rs-5663072/v1), 2025-04-10
Supplement: Supplementary file 1 [file 55d8eb6eae425ae01134b6d3.pdf]

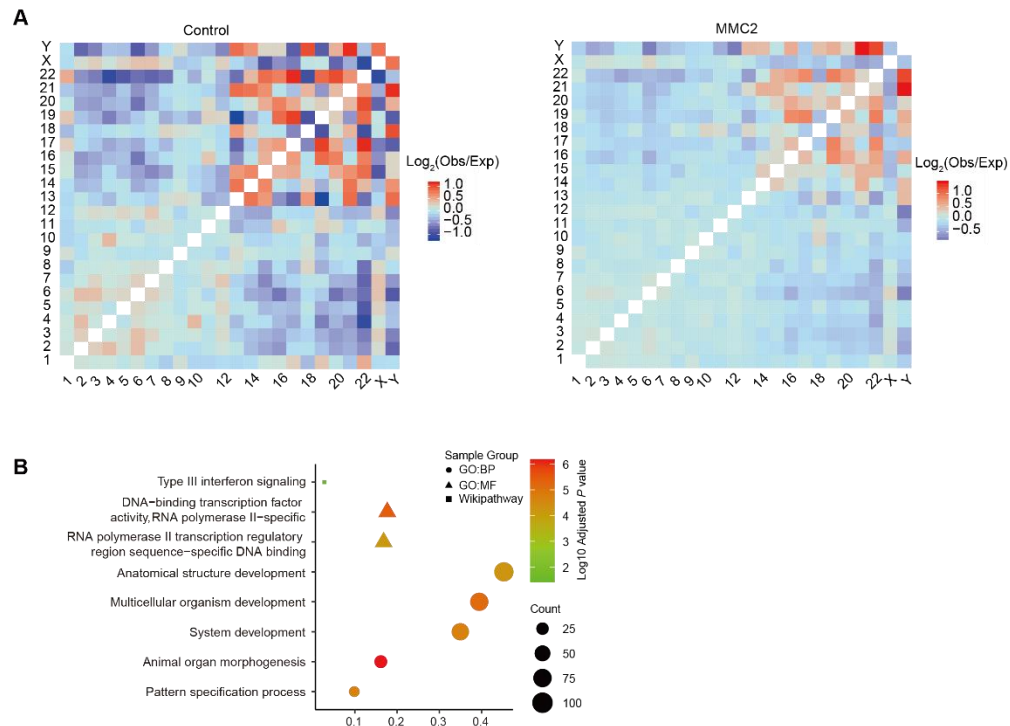

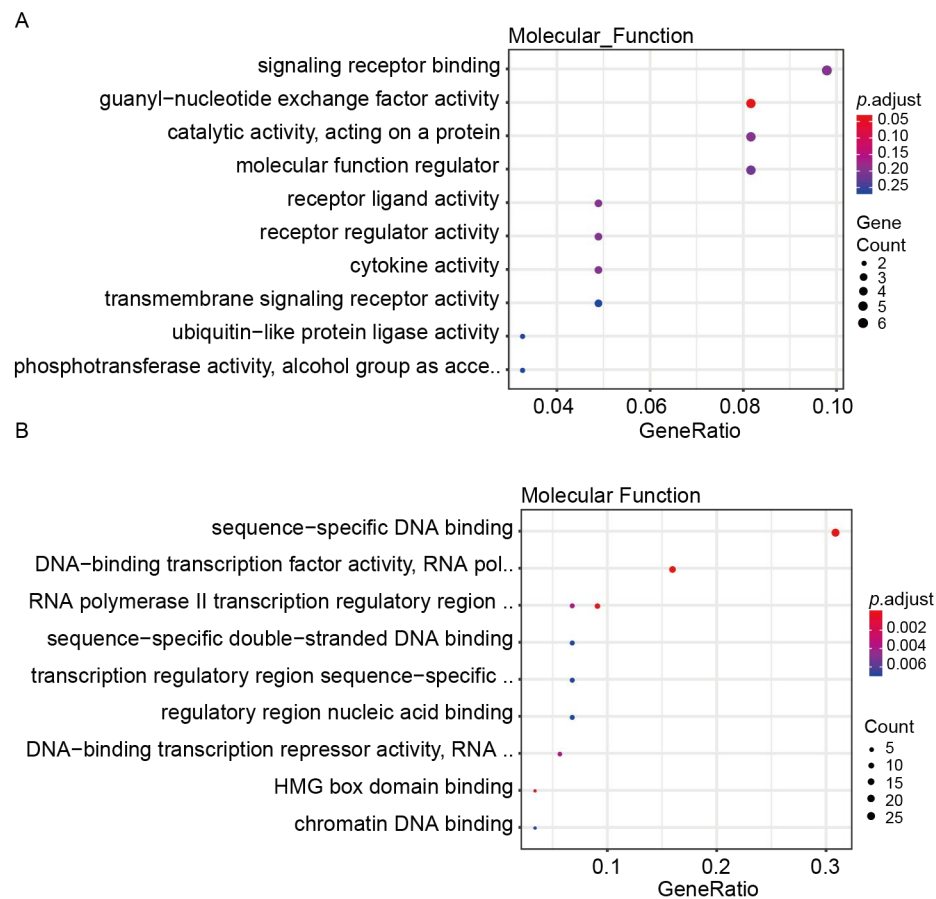

**Figure S2** GO enrichment molecular function (MF) analysis of genes with TAD boundary of difference (**A**) and loop difference associated genes (**B**).

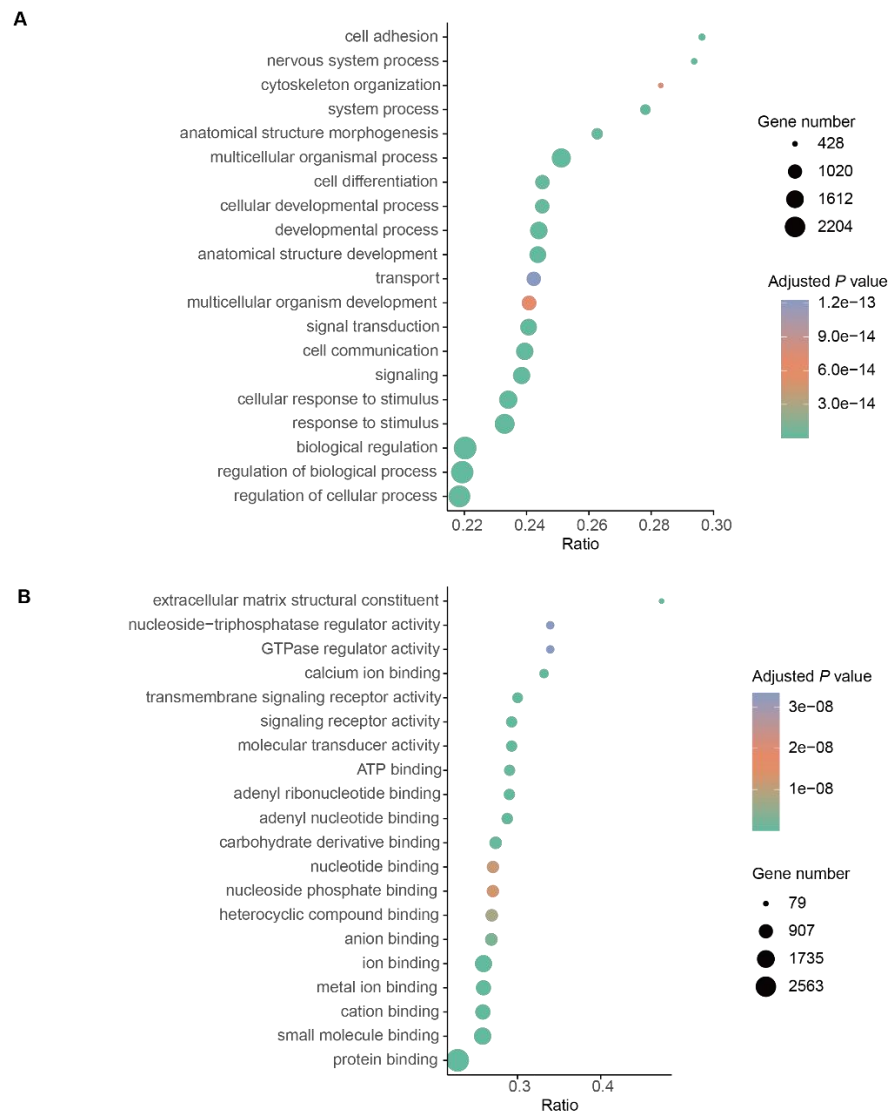

**Figure S3** GO enrichment biological process (BP) (**A**) and molecular function (MF) (**B**) and analysis of genes with variations in the CDS region.

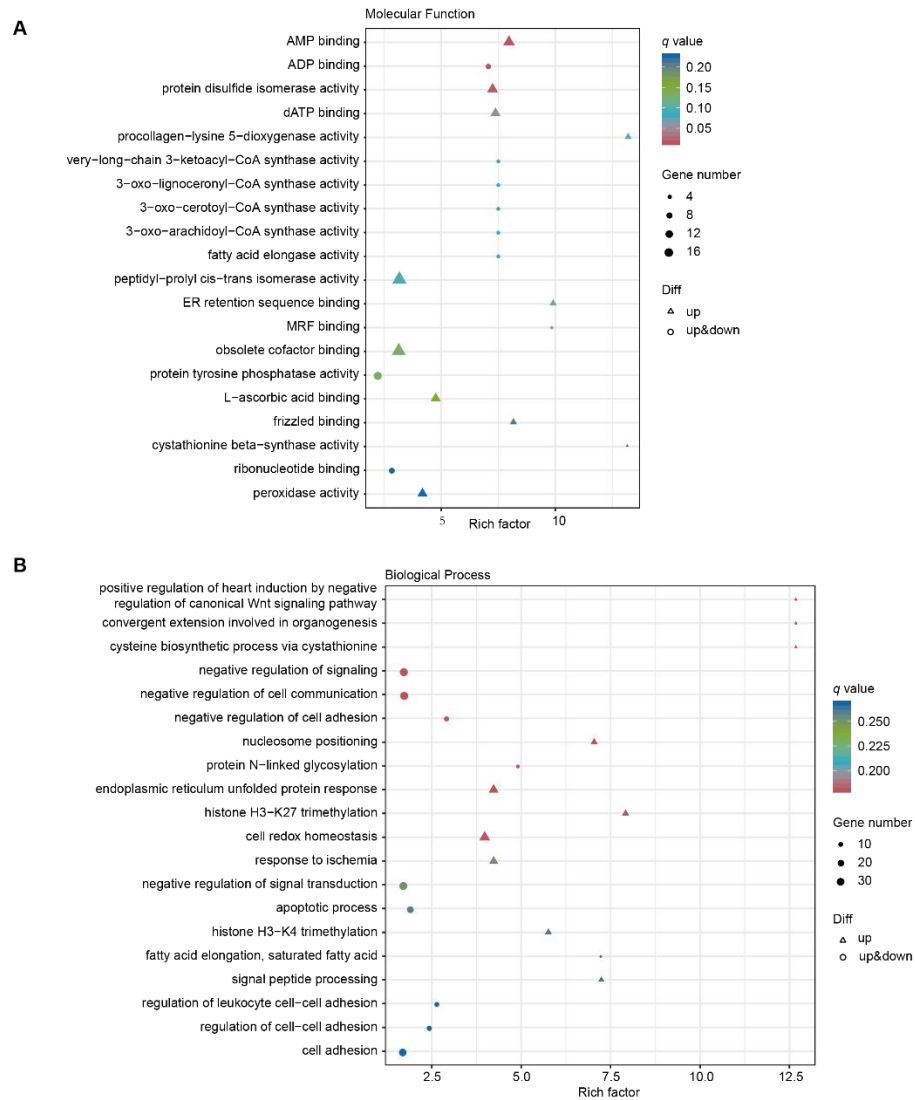

**Figure S4** GO Enrichment Analysis on DEGs. Bubble chart of GO Molecular Function (**A**) and Biological Process (**B**) enrichment on DEGs. The top 20 enriched pathways (with the smallest Q-value) were shown.
